# Supplementary material for: Distribution and Conservation of Plants in the Northeastern Qinghai–Tibet Plateau under Climate Change
Source: MDPI journal article supplement (doi:10.3390/d14110956), 2022-11-07
Supplement: s1 [file s1]

## Supplementary Materials

**Table S1.** List of woody and herbaceous plants in Qinghai Province.

| Species                                               | Types      |
|-------------------------------------------------------|------------|
| <i>Acanthocalyx alba</i>                              | Herbaceous |
| <i>Achnatherum breviaristatum</i>                     | Herbaceous |
| <i>Achnatherum inebrians</i>                          | Herbaceous |
| <i>Achnatherum psilanthrum</i>                        | Herbaceous |
| <i>Achnatherum sibiricum</i>                          | Herbaceous |
| <i>Achnatherum splendens</i>                          | Herbaceous |
| <i>Aconitum flavum</i>                                | Herbaceous |
| <i>Aconitum gymnandrum</i>                            | Herbaceous |
| <i>Aconitum pendulum</i>                              | Herbaceous |
| <i>Aconitum sinomontanum</i>                          | Herbaceous |
| <i>Aconitum tanguticum</i>                            | Herbaceous |
| <i>Acronema chinense</i>                              | Herbaceous |
| <i>Actinocarya tibetica</i>                           | Herbaceous |
| <i>Adenophora himalayana</i>                          | Herbaceous |
| <i>Adenophora liliifolioides</i>                      | Herbaceous |
| <i>Adenophora potaninii</i>                           | Herbaceous |
| <i>Adenophora stenanthina</i>                         | Herbaceous |
| <i>Adenophora stenanthina</i> subsp. <i>sylvatica</i> | Herbaceous |
| <i>Adonis bobroviana</i>                              | Herbaceous |
| <i>Adonis coerulea</i>                                | Herbaceous |
| <i>Agrimonia pilosa</i>                               | Herbaceous |
| <i>Agriophyllum squarrosum</i>                        | Herbaceous |
| <i>Agropyron cristatum</i>                            | Herbaceous |
| <i>Agropyron desertorum</i>                           | Herbaceous |
| <i>Agrostis gigantea</i>                              | Herbaceous |
| <i>Agrostis sozanensis</i>                            | Herbaceous |
| <i>Ajania fruticulosa</i>                             | Herbaceous |
| <i>Ajania khartensis</i>                              | Herbaceous |
| <i>Ajania przewalskii</i>                             | Herbaceous |
| <i>Ajania ramosa</i>                                  | Woody      |
| <i>Ajania tenuifolia</i>                              | Herbaceous |
| <i>Ajuga lupulina</i>                                 | Herbaceous |
| <i>Aleuritopteris argentea</i>                        | Herbaceous |
| <i>Allium aciphyllum</i>                              | Herbaceous |
| <i>Allium atrosanguineum</i>                          | Herbaceous |
| <i>Allium carolinianum</i>                            | Herbaceous |
| <i>Allium chrysanthum</i>                             | Herbaceous |
| <i>Allium chrysocephalum</i>                          | Herbaceous |
| <i>Allium cyaneum</i>                                 | Herbaceous |
| <i>Allium cyathophorum</i>                            | Herbaceous |
| <i>Allium fasciculatum</i>                            | Herbaceous |
| <i>Allium herderianum</i>                             | Herbaceous |
| <i>Allium mongolicum</i>                              | Herbaceous |
| <i>Allium polyrhizum</i>                              | Herbaceous |
| <i>Allium prattii</i>                                 | Herbaceous |
| <i>Allium przewalskianum</i>                          | Herbaceous |
| <i>Allium ramosum</i>                                 | Herbaceous |
| <i>Allium rude</i>                                    | Herbaceous |
| <i>Allium sikkimense</i>                              | Herbaceous |
| <i>Allium subangulatum</i>                            | Herbaceous |
| <i>Allium tanguticum</i>                              | Herbaceous |
| <i>Allium yuanum</i>                                  | Herbaceous |
| <i>Amaranthus retroflexus</i>                         | Herbaceous |
| <i>Anaphalis acutifolia</i>                           | Herbaceous |
| <i>Anaphalis aureopunctata</i>                        | Herbaceous |
| <i>Anaphalis bicolor</i>                              | Herbaceous |
| <i>Anaphalis flavescens</i>                           | Herbaceous |
| <i>Anaphalis hancockii</i>                            | Herbaceous |
| <i>Anaphalis lactea</i>                               | Herbaceous |
| <i>Anaphalis latialata</i>                            | Herbaceous |
| <i>Anaphalis margaritacea</i>                         | Herbaceous |

|                                                |            |
|------------------------------------------------|------------|
| <i>Anaphalis souliei</i>                       | Herbaceous |
| <i>Anchusa ovata</i>                           | Herbaceous |
| <i>Androsace adenocephala</i>                  | Herbaceous |
| <i>Androsace erecta</i>                        | Herbaceous |
| <i>Androsace gmelinii</i> var. <i>geophila</i> | Herbaceous |
| <i>Androsace mariae</i>                        | Herbaceous |
| <i>Androsace squarrosula</i>                   | Herbaceous |
| <i>Androsace tanggulashanensis</i>             | Herbaceous |
| <i>Androsace tapete</i>                        | Herbaceous |
| <i>Androsace yargongensis</i>                  | Herbaceous |
| <i>Androsace zambalensis</i>                   | Herbaceous |
| <i>Anemone coelestina</i> var. <i>linearis</i> | Herbaceous |
| <i>Anemone demissa</i>                         | Herbaceous |
| <i>Anemone geum</i> subsp. <i>ovalifolia</i>   | Herbaceous |
| <i>Anemone imbricata</i>                       | Herbaceous |
| <i>Anemone obtusiloba</i>                      | Herbaceous |
| <i>Anemone rivularis</i>                       | Herbaceous |
| <i>Anemone tomentosa</i>                       | Herbaceous |
| <i>Angelica nitida</i>                         | Herbaceous |
| <i>Anisodus tanguticus</i>                     | Herbaceous |
| <i>Apocynum pictum</i>                         | Herbaceous |
| <i>Aquilegia ecalcarata</i>                    | Herbaceous |
| <i>Aquilegia viridiflora</i>                   | Herbaceous |
| <i>Arabis pendula</i>                          | Herbaceous |
| <i>Arenaria brevipetala</i>                    | Herbaceous |
| <i>Arenaria bryophylla</i>                     | Herbaceous |
| <i>Arenaria forrestii</i>                      | Herbaceous |
| <i>Arenaria kansuensis</i>                     | Herbaceous |
| <i>Arenaria melanandra</i>                     | Herbaceous |
| <i>Arenaria przewalskii</i>                    | Herbaceous |
| <i>Arenaria roborowskii</i>                    | Herbaceous |
| <i>Arenaria saginoides</i>                     | Herbaceous |
| <i>Arisaema wardii</i>                         | Herbaceous |
| <i>Aristida trisetia</i>                       | Herbaceous |
| <i>Artemisia adamsii</i>                       | Herbaceous |
| <i>Artemisia anethoides</i>                    | Herbaceous |
| <i>Artemisia annua</i>                         | Herbaceous |
| <i>Artemisia campbellii</i>                    | Herbaceous |
| <i>Artemisia dalai-lamae</i>                   | Herbaceous |
| <i>Artemisia demissa</i>                       | Herbaceous |
| <i>Artemisia desertorum</i>                    | Herbaceous |
| <i>Artemisia dracunculus</i>                   | Herbaceous |
| <i>Artemisia dubia</i> var. <i>subdigitata</i> | Herbaceous |
| <i>Artemisia duthreuil-de-rhinsi</i>           | Herbaceous |
| <i>Artemisia frigida</i>                       | Herbaceous |
| <i>Artemisia gmelinii</i>                      | Herbaceous |
| <i>Artemisia hedinii</i>                       | Herbaceous |
| <i>Artemisia leucophylla</i>                   | Herbaceous |
| <i>Artemisia macrocephala</i>                  | Herbaceous |
| <i>Artemisia mattenfeldii</i>                  | Herbaceous |
| <i>Artemisia minor</i>                         | Herbaceous |
| <i>Artemisia mongolica</i>                     | Herbaceous |
| <i>Artemisia moorcroftiana</i>                 | Herbaceous |
| <i>Artemisia myriantha</i>                     | Herbaceous |
| <i>Artemisia nanschanica</i>                   | Herbaceous |
| <i>Artemisia pewzowii</i>                      | Herbaceous |
| <i>Artemisia phaeolepis</i>                    | Herbaceous |
| <i>Artemisia phyllobotrys</i>                  | Herbaceous |
| <i>Artemisia roxburghiana</i>                  | Herbaceous |
| <i>Artemisia scoparia</i>                      | Herbaceous |
| <i>Artemisia sieversiana</i>                   | Herbaceous |
| <i>Artemisia stechmanniana</i>                 | Herbaceous |
| <i>Artemisia stricta</i>                       | Herbaceous |
| <i>Artemisia tangutica</i>                     | Herbaceous |
| <i>Artemisia verbenacea</i>                    | Herbaceous |
| <i>Artemisia vestita</i>                       | Herbaceous |

|                                                   |            |
|---------------------------------------------------|------------|
| <i>Artemisia vulgaris</i>                         | Herbaceous |
| <i>Artemisia waltonii</i>                         | Herbaceous |
| <i>Askellia flexuosa</i>                          | Herbaceous |
| <i>Asparagus acicularis</i>                       | Herbaceous |
| <i>Asparagus brachyphyllus</i>                    | Herbaceous |
| <i>Asparagus breslerianus</i>                     | Herbaceous |
| <i>Asparagus filicinus</i>                        | Herbaceous |
| <i>Asparagus longiflorus</i>                      | Herbaceous |
| <i>Asperugo procumbens</i>                        | Herbaceous |
| <i>Aster alpinus</i>                              | Herbaceous |
| <i>Aster altaicus</i>                             | Herbaceous |
| <i>Aster asteroides</i>                           | Herbaceous |
| <i>Aster boweri</i>                               | Herbaceous |
| <i>Aster crenatifolius</i>                        | Herbaceous |
| <i>Aster diplostephioides</i>                     | Herbaceous |
| <i>Aster farreri</i>                              | Herbaceous |
| <i>Aster flaccidus</i>                            | Herbaceous |
| <i>Aster gouldii</i>                              | Herbaceous |
| <i>Aster hispidus</i>                             | Herbaceous |
| <i>Aster poliothamnus</i>                         | Herbaceous |
| <i>Aster semiprostratus</i>                       | Herbaceous |
| <i>Aster souliei</i>                              | Herbaceous |
| <i>Aster tongolensis</i>                          | Herbaceous |
| <i>Aster trinervius</i> subsp. <i>ageratoides</i> | Herbaceous |
| <i>Aster yunnanensis</i> var. <i>labrangensis</i> | Herbaceous |
| <i>Asterothamnus centrali-asiaticus</i>           | Herbaceous |
| <i>Astragalus arnoldii</i>                        | Herbaceous |
| <i>Astragalus chaidamuensis</i>                   | Herbaceous |
| <i>Astragalus chrysopterus</i>                    | Herbaceous |
| <i>Astragalus confertus</i>                       | Herbaceous |
| <i>Astragalus densiflorus</i>                     | Herbaceous |
| <i>Astragalus floridulus</i>                      | Herbaceous |
| <i>Astragalus galactites</i>                      | Herbaceous |
| <i>Astragalus golmuensis</i>                      | Herbaceous |
| <i>Astragalus kukunoricus</i>                     | Herbaceous |
| <i>Astragalus laxmannii</i>                       | Herbaceous |
| <i>Astragalus licentianus</i>                     | Herbaceous |
| <i>Astragalus mahoschanicus</i>                   | Herbaceous |
| <i>Astragalus mattam</i>                          | Herbaceous |
| <i>Astragalus melilotoides</i>                    | Herbaceous |
| <i>Astragalus monadelphus</i>                     | Herbaceous |
| <i>Astragalus monbeigii</i>                       | Herbaceous |
| <i>Astragalus mongholicus</i>                     | Herbaceous |
| <i>Astragalus nivalis</i>                         | Herbaceous |
| <i>Astragalus peterae</i>                         | Herbaceous |
| <i>Astragalus polycladus</i>                      | Herbaceous |
| <i>Astragalus przewalskii</i>                     | Herbaceous |
| <i>Astragalus scaberrimus</i>                     | Herbaceous |
| <i>Astragalus skythopos</i>                       | Herbaceous |
| <i>Astragalus strictus</i>                        | Herbaceous |
| <i>Astragalus sungpanensis</i>                    | Herbaceous |
| <i>Astragalus tenuis</i>                          | Herbaceous |
| <i>Astragalus tongolensis</i>                     | Herbaceous |
| <i>Astragalus variabilis</i>                      | Herbaceous |
| <i>Astragalus yunnanensis</i>                     | Herbaceous |
| <i>Astragalus zacharensis</i>                     | Herbaceous |
| <i>Atriplex centralasiatica</i>                   | Herbaceous |
| <i>Atriplex sibirica</i>                          | Herbaceous |
| <i>Avena fatua</i>                                | Herbaceous |
| <i>Bassia dasyphylla</i>                          | Herbaceous |
| <i>Batrachium bungei</i>                          | Herbaceous |
| <i>Beckmannia syzigachne</i>                      | Herbaceous |
| <i>Berberis dasystachya</i>                       | Woody      |
| <i>Berberis diaphana</i>                          | Woody      |
| <i>Berberis dubia</i>                             | Woody      |
| <i>Berberis kansuensis</i>                        | Woody      |

|                                                         |            |
|---------------------------------------------------------|------------|
| <i>Berberis verna</i>                                   | Woody      |
| <i>Betula albosinensis</i>                              | Woody      |
| <i>Betula platyphylla</i>                               | Woody      |
| <i>Betula utilis</i>                                    | Woody      |
| <i>Bidens tripartita</i>                                | Herbaceous |
| <i>Biebersteinia heterostemon</i>                       | Herbaceous |
| <i>Blysmus sinocompressus</i>                           | Herbaceous |
| <i>Bolboschoenus planiculmis</i>                        | Herbaceous |
| <i>Bothriospermum kusnezowii</i>                        | Herbaceous |
| <i>Braya rosea</i>                                      | Herbaceous |
| <i>Bromus japonicus</i>                                 | Herbaceous |
| <i>Bromus paulsenii</i>                                 | Herbaceous |
| <i>Bromus sinensis</i>                                  | Herbaceous |
| <i>Bromus tectorum</i>                                  | Herbaceous |
| <i>Bupleurum commelynoideum</i>                         | Herbaceous |
| <i>Bupleurum commelynoideum</i> var. <i>flaviflorum</i> | Herbaceous |
| <i>Bupleurum condensatum</i>                            | Herbaceous |
| <i>Bupleurum longicaule</i>                             | Herbaceous |
| <i>Bupleurum longicaule</i> var. <i>giraldii</i>        | Herbaceous |
| <i>Bupleurum malconense</i>                             | Herbaceous |
| <i>Bupleurum microcephalum</i>                          | Herbaceous |
| <i>Bupleurum smithii</i>                                | Herbaceous |
| <i>Bupleurum smithii</i> var. <i>parvifolium</i>        | Herbaceous |
| <i>Calamagrostis pseudophragmites</i>                   | Herbaceous |
| <i>Calendula officinalis</i>                            | Herbaceous |
| <i>Callianthemum alatavicum</i>                         | Herbaceous |
| <i>Callianthemum pimpinelloides</i>                     | Herbaceous |
| <i>Calligonum mongolicum</i>                            | Woody      |
| <i>Calligonum zaidamense</i>                            | Woody      |
| <i>Caltha scaposa</i>                                   | Herbaceous |
| <i>Campanula aristata</i>                               | Herbaceous |
| <i>Cancrinia maximowiczii</i>                           | Herbaceous |
| <i>Cannabis sativa</i>                                  | Herbaceous |
| <i>Capsella bursa-pastoris</i>                          | Herbaceous |
| <i>Caragana acanthophylla</i>                           | Woody      |
| <i>Caragana brevifolia</i>                              | Woody      |
| <i>Caragana chinghaiensis</i>                           | Woody      |
| <i>Caragana erinacea</i>                                | Woody      |
| <i>Caragana gerardiana</i>                              | Woody      |
| <i>Caragana jubata</i>                                  | Woody      |
| <i>Caragana jubata</i> var. <i>recurva</i>              | Woody      |
| <i>Caragana junatovii</i>                               | Woody      |
| <i>Caragana kozlovii</i>                                | Woody      |
| <i>Caragana opulens</i>                                 | Woody      |
| <i>Caragana roborovskyi</i>                             | Woody      |
| <i>Caragana tangutica</i>                               | Woody      |
| <i>Caragana tibetica</i>                                | Woody      |
| <i>Cardamine macrophylla</i>                            | Herbaceous |
| <i>Cardamine tangutorum</i>                             | Herbaceous |
| <i>Carduus acanthoides</i>                              | Herbaceous |
| <i>Carduus crispus</i>                                  | Herbaceous |
| <i>Carex adrieni</i>                                    | Herbaceous |
| <i>Carex atrofusca</i>                                  | Herbaceous |
| <i>Carex atrofusca</i> subsp. <i>minor</i>              | Herbaceous |
| <i>Carex coriophora</i>                                 | Herbaceous |
| <i>Carex crebra</i>                                     | Herbaceous |
| <i>Carex duriuscula</i> subsp. <i>rigescens</i>         | Herbaceous |
| <i>Carex haematostoma</i>                               | Herbaceous |
| <i>Carex ivanoviae</i>                                  | Herbaceous |
| <i>Carex kansuensis</i>                                 | Herbaceous |
| <i>Carex moorcroftii</i>                                | Herbaceous |
| <i>Carex przewalskii</i>                                | Herbaceous |
| <i>Carex pseudofetida</i>                               | Herbaceous |
| <i>Carex scabrirostris</i>                              | Herbaceous |
| <i>Carpesium lipskyi</i>                                | Herbaceous |
| <i>Carum buriaticum</i>                                 | Herbaceous |

|                                                  |            |
|--------------------------------------------------|------------|
| <i>Carum carvi</i>                               | Herbaceous |
| <i>Caryopteris mongholica</i>                    | Woody      |
| <i>Caryopteris tangutica</i>                     | Woody      |
| <i>Caryopteris trichosphaera</i>                 | Woody      |
| <i>Catabrosa aquatica</i>                        | Herbaceous |
| <i>Catabrosa aquatica</i> var. <i>angusta</i>    | Herbaceous |
| <i>Cerastium arvense</i>                         | Herbaceous |
| <i>Cerastium fontanum</i>                        | Herbaceous |
| <i>Cerastium fontanum</i> subsp. <i>vulgare</i>  | Herbaceous |
| <i>Cerastium pusillum</i>                        | Herbaceous |
| <i>Cerasus stipulacea</i>                        | Woody      |
| <i>Cerasus tomentosa</i>                         | Woody      |
| <i>Chamaerhodos erecta</i>                       | Herbaceous |
| <i>Chamaesium paradoxum</i>                      | Herbaceous |
| <i>Chamaesium thalictrifolium</i>                | Herbaceous |
| <i>Chamerion angustifolium</i>                   | Herbaceous |
| <i>Chenopodium album</i>                         | Herbaceous |
| <i>Chenopodium glaucum</i>                       | Herbaceous |
| <i>Chenopodium hybridum</i>                      | Herbaceous |
| <i>Chenopodium iljinii</i>                       | Herbaceous |
| <i>Chenopodium karoii</i>                        | Herbaceous |
| <i>Chloris virgata</i>                           | Herbaceous |
| <i>Chrysanthemum chanetii</i>                    | Herbaceous |
| <i>Cicerbita roborowskii</i>                     | Herbaceous |
| <i>Cimicifuga foetida</i>                        | Herbaceous |
| <i>Circaea alpina</i>                            | Herbaceous |
| <i>Circaea agrestis</i>                          | Herbaceous |
| <i>Cirsium arvense</i> var. <i>alpestre</i>      | Herbaceous |
| <i>Cirsium arvense</i> var. <i>integrifolium</i> | Herbaceous |
| <i>Cirsium souliei</i>                           | Herbaceous |
| <i>Clematis aethusifolia</i>                     | Herbaceous |
| <i>Clematis akebioides</i>                       | Woody      |
| <i>Clematis brevicaudata</i>                     | Woody      |
| <i>Clematis glauca</i>                           | Herbaceous |
| <i>Clematis intricata</i>                        | Herbaceous |
| <i>Clematis macropetala</i>                      | Woody      |
| <i>Clematis nannophylla</i>                      | Woody      |
| <i>Clematis rehderiana</i>                       | Woody      |
| <i>Clematis tangutica</i>                        | Herbaceous |
| <i>Codonopsis canescens</i>                      | Herbaceous |
| <i>Codonopsis viridiflora</i>                    | Herbaceous |
| <i>Coluria longifolia</i>                        | Herbaceous |
| <i>Comarum salesovianum</i>                      | Herbaceous |
| <i>Comastoma cyananthiflorum</i>                 | Herbaceous |
| <i>Comastoma falcatum</i>                        | Herbaceous |
| <i>Comastoma pedunculatum</i>                    | Herbaceous |
| <i>Comastoma polycladum</i>                      | Herbaceous |
| <i>Comastoma pulmonarium</i>                     | Herbaceous |
| <i>Convolvulus ammannii</i>                      | Herbaceous |
| <i>Convolvulus arvensis</i>                      | Herbaceous |
| <i>Corethroedendron multijugum</i>               | Herbaceous |
| <i>Corispermum tibeticum</i>                     | Herbaceous |
| <i>Corydalis adunca</i>                          | Herbaceous |
| <i>Corydalis conspersa</i>                       | Herbaceous |
| <i>Corydalis curviflora</i>                      | Herbaceous |
| <i>Corydalis dasyptera</i>                       | Herbaceous |
| <i>Corydalis impatiens</i>                       | Herbaceous |
| <i>Corydalis linarioides</i>                     | Herbaceous |
| <i>Corydalis livida</i>                          | Herbaceous |
| <i>Corydalis melanochlora</i>                    | Herbaceous |
| <i>Corydalis mucronifera</i>                     | Herbaceous |
| <i>Corydalis pseudoimpatiens</i>                 | Herbaceous |
| <i>Corydalis scaberula</i>                       | Herbaceous |
| <i>Corydalis straminea</i>                       | Herbaceous |
| <i>Corydalis stricta</i>                         | Herbaceous |
| <i>Corydalis trachycarpa</i>                     | Herbaceous |

|                                                       |            |
|-------------------------------------------------------|------------|
| <i>Corydalis zadoiensis</i>                           | Herbaceous |
| <i>Cosmos bipinnatus</i>                              | Herbaceous |
| <i>Cotoneaster acuminatus</i>                         | Woody      |
| <i>Cotoneaster acutifolius</i>                        | Woody      |
| <i>Cotoneaster adpressus</i>                          | Woody      |
| <i>Cotoneaster divaricatus</i>                        | Woody      |
| <i>Cotoneaster gracilis</i>                           | Woody      |
| <i>Cotoneaster multiflorus</i>                        | Woody      |
| <i>Cotoneaster submultiflorus</i>                     | Woody      |
| <i>Cotoneaster zabelii</i>                            | Woody      |
| <i>Crataegus kansuensis</i>                           | Woody      |
| <i>Cremanthodium brunneopilosum</i>                   | Herbaceous |
| <i>Cremanthodium discoideum</i>                       | Herbaceous |
| <i>Cremanthodium ellisii</i>                          | Herbaceous |
| <i>Cremanthodium humile</i>                           | Herbaceous |
| <i>Cremanthodium lineare</i>                          | Herbaceous |
| <i>Cryptogramma stelleri</i>                          | Herbaceous |
| <i>Cuscuta europaea</i>                               | Herbaceous |
| <i>Cyananthus hookeri</i>                             | Herbaceous |
| <i>Cymbaria mongolica</i>                             | Herbaceous |
| <i>Cynanchum chinense</i>                             | Herbaceous |
| <i>Cynanchum thesioides</i>                           | Herbaceous |
| <i>Cynoglossum gansuense</i>                          | Herbaceous |
| <i>Cynoglossum wallichii</i> var. <i>glochidiatum</i> | Herbaceous |
| <i>Cynomorium songaricum</i>                          | Herbaceous |
| <i>Cystopteris fragilis</i>                           | Herbaceous |
| <i>Cystopteris montana</i>                            | Herbaceous |
| <i>Dactylorhiza hatagirea</i>                         | Herbaceous |
| <i>Dactylorhiza viridis</i>                           | Herbaceous |
| <i>Daphne retusa</i>                                  | Woody      |
| <i>Daphne tangutica</i>                               | Woody      |
| <i>Datura stramonium</i>                              | Herbaceous |
| <i>Delphinium albocoeruleum</i>                       | Herbaceous |
| <i>Delphinium caeruleum</i>                           | Herbaceous |
| <i>Delphinium candelabrum</i>                         | Herbaceous |
| <i>Delphinium candelabrum</i> var. <i>monanthum</i>   | Herbaceous |
| <i>Delphinium grandiflorum</i>                        | Herbaceous |
| <i>Delphinium kamaonense</i>                          | Herbaceous |
| <i>Delphinium kamaonense</i> var. <i>glabrescens</i>  | Herbaceous |
| <i>Delphinium nangchienenense</i>                     | Herbaceous |
| <i>Delphinium pylzowii</i>                            | Herbaceous |
| <i>Delphinium pylzowii</i> var. <i>trigynum</i>       | Herbaceous |
| <i>Delphinium sparsiflorum</i>                        | Herbaceous |
| <i>Delphinium tangkulaense</i>                        | Herbaceous |
| <i>Delphinium trichophorum</i>                        | Herbaceous |
| <i>Deschampsia cespitosa</i>                          | Herbaceous |
| <i>Deschampsia littoralis</i>                         | Herbaceous |
| <i>Descurainia sophia</i>                             | Herbaceous |
| <i>Deyeuxia flavens</i>                               | Herbaceous |
| <i>Deyeuxia kokonorica</i>                            | Herbaceous |
| <i>Deyeuxia pyramidalis</i>                           | Herbaceous |
| <i>Deyeuxia scabrescens</i>                           | Herbaceous |
| <i>Deyeuxia tibetica</i> var. <i>przevalskyi</i>      | Herbaceous |
| <i>Dianthus superbus</i>                              | Herbaceous |
| <i>Dicranostigma leptopodum</i>                       | Herbaceous |
| <i>Dilophia ebracteata</i>                            | Herbaceous |
| <i>Dilophia salsa</i>                                 | Herbaceous |
| <i>Dipsacus japonicus</i>                             | Herbaceous |
| <i>Dontostemon glandulosus</i>                        | Herbaceous |
| <i>Dontostemon tibeticus</i>                          | Herbaceous |
| <i>Doronicum stenoglossum</i>                         | Herbaceous |
| <i>Draba altaica</i>                                  | Herbaceous |
| <i>Draba eriopoda</i>                                 | Herbaceous |
| <i>Draba ladyginii</i>                                | Herbaceous |
| <i>Draba lanceolata</i>                               | Herbaceous |
| <i>Draba mongolica</i>                                | Herbaceous |

|                                                       |            |
|-------------------------------------------------------|------------|
| <i>Draba nemorosa</i>                                 | Herbaceous |
| <i>Draba oreades</i>                                  | Herbaceous |
| <i>Dracocephalum argunense</i>                        | Herbaceous |
| <i>Dracocephalum heterophyllum</i>                    | Herbaceous |
| <i>Dracocephalum rupestre</i>                         | Herbaceous |
| <i>Dracocephalum tanguticum</i>                       | Herbaceous |
| <i>Drynaria baronii</i>                               | Herbaceous |
| <i>Dryopteris barbigera</i>                           | Herbaceous |
| <i>Dryopteris komarovii</i>                           | Herbaceous |
| <i>Dysphania aristata</i>                             | Herbaceous |
| <i>Dysphania schraderiana</i>                         | Herbaceous |
| <i>Echinops gmelinii</i>                              | Herbaceous |
| <i>Elaeagnus angustifolia</i>                         | Woody      |
| <i>Eleocharis abnorma</i>                             | Herbaceous |
| <i>Eleutherococcus giraldii</i>                       | Woody      |
| <i>Eleutherococcus wilsonii</i> var. <i>pilosulus</i> | Woody      |
| <i>Elsholtzia densa</i>                               | Herbaceous |
| <i>Elsholtzia feddei</i>                              | Herbaceous |
| <i>Elsholtzia fruticosa</i>                           | Woody      |
| <i>Elymus abolinii</i>                                | Herbaceous |
| <i>Elymus antiquus</i>                                | Herbaceous |
| <i>Elymus aristiglumis</i>                            | Herbaceous |
| <i>Elymus atratus</i>                                 | Herbaceous |
| <i>Elymus breviaristatus</i>                          | Herbaceous |
| <i>Elymus brevipes</i>                                | Herbaceous |
| <i>Elymus burchan-buddae</i>                          | Herbaceous |
| <i>Elymus dahuricus</i>                               | Herbaceous |
| <i>Elymus dahuricus</i> var. <i>cylindricus</i>       | Herbaceous |
| <i>Elymus dolichatherus</i>                           | Herbaceous |
| <i>Elymus nutans</i>                                  | Herbaceous |
| <i>Elymus purpurascens</i>                            | Herbaceous |
| <i>Elymus sibiricus</i>                               | Herbaceous |
| <i>Elymus sinicus</i>                                 | Herbaceous |
| <i>Elymus strictus</i>                                | Herbaceous |
| <i>Elymus tangutorum</i>                              | Herbaceous |
| <i>Elymus trichospiculus</i>                          | Herbaceous |
| <i>Ephedra equisetina</i>                             | Woody      |
| <i>Ephedra intermedia</i>                             | Woody      |
| <i>Ephedra monosperma</i>                             | Woody      |
| <i>Ephedra przewalskii</i>                            | Woody      |
| <i>Epilobium palustre</i>                             | Herbaceous |
| <i>Epipactis helleborine</i>                          | Herbaceous |
| <i>Equisetum arvense</i>                              | Herbaceous |
| <i>Equisetum palustre</i>                             | Herbaceous |
| <i>Equisetum ramosissimum</i>                         | Herbaceous |
| <i>Erigeron acris</i>                                 | Herbaceous |
| <i>Erigeron patentisquama</i>                         | Herbaceous |
| <i>Eriophyton wallichii</i>                           | Herbaceous |
| <i>Eritrichium medicarpum</i>                         | Herbaceous |
| <i>Erodium stephanianum</i>                           | Herbaceous |
| <i>Eruca vesicaria</i> subsp. <i>sativa</i>           | Herbaceous |
| <i>Erysimum funiculosum</i>                           | Herbaceous |
| <i>Erysimum roseum</i>                                | Herbaceous |
| <i>Euonymus giraldii</i>                              | Woody      |
| <i>Euonymus semenovii</i>                             | Woody      |
| <i>Euphorbia alataavica</i>                           | Herbaceous |
| <i>Euphorbia altotibetica</i>                         | Herbaceous |
| <i>Euphorbia helioscopia</i>                          | Herbaceous |
| <i>Euphorbia kansuensis</i>                           | Herbaceous |
| <i>Euphorbia micractina</i>                           | Herbaceous |
| <i>Euphorbia stracheyi</i>                            | Herbaceous |
| <i>Euphrasia pectinata</i>                            | Herbaceous |
| <i>Euphrasia regelii</i>                              | Herbaceous |
| <i>Eutrema heterophyllum</i>                          | Herbaceous |
| <i>Fagopyrum esculentum</i>                           | Herbaceous |
| <i>Fagopyrum tataricum</i>                            | Herbaceous |

|                                              |            |
|----------------------------------------------|------------|
| <i>Fallopia aubertii</i>                     | Herbaceous |
| <i>Fallopia convolvulus</i>                  | Herbaceous |
| <i>Festuca alaica</i>                        | Herbaceous |
| <i>Festuca coelestis</i>                     | Herbaceous |
| <i>Festuca forrestii</i>                     | Herbaceous |
| <i>Festuca nitidula</i>                      | Herbaceous |
| <i>Festuca ovina</i>                         | Herbaceous |
| <i>Festuca rubra</i>                         | Herbaceous |
| <i>Festuca rubra subsp. arctica</i>          | Herbaceous |
| <i>Festuca sinensis</i>                      | Herbaceous |
| <i>Festuca valesiaca</i>                     | Herbaceous |
| <i>Fragaria gracilis</i>                     | Herbaceous |
| <i>Fragaria orientalis</i>                   | Herbaceous |
| <i>Fritillaria cirrhosa</i>                  | Herbaceous |
| <i>Fritillaria przewalskii</i>               | Herbaceous |
| <i>Fritillaria unibracteata</i>              | Herbaceous |
| <i>Gagea pauciflora</i>                      | Herbaceous |
| <i>Galeopsis bifida</i>                      | Herbaceous |
| <i>Galium aparine</i>                        | Herbaceous |
| <i>Galium boreale</i>                        | Herbaceous |
| <i>Galium boreale var. ciliatum</i>          | Herbaceous |
| <i>Galium spurium</i>                        | Herbaceous |
| <i>Galium verum</i>                          | Herbaceous |
| <i>Galium verum var. trachycarpum</i>        | Herbaceous |
| <i>Gentiana abaensis</i>                     | Herbaceous |
| <i>Gentiana algida</i>                       | Herbaceous |
| <i>Gentiana aperta</i>                       | Herbaceous |
| <i>Gentiana aristata</i>                     | Herbaceous |
| <i>Gentiana dahurica</i>                     | Herbaceous |
| <i>Gentiana lawrencei</i>                    | Herbaceous |
| <i>Gentiana leucomelaena</i>                 | Herbaceous |
| <i>Gentiana lhasica</i>                      | Herbaceous |
| <i>Gentiana macrophylla</i>                  | Herbaceous |
| <i>Gentiana nubigena</i>                     | Herbaceous |
| <i>Gentiana pseudoaquatica</i>               | Herbaceous |
| <i>Gentiana pudica</i>                       | Herbaceous |
| <i>Gentiana purdomii</i>                     | Herbaceous |
| <i>Gentiana sinoornata</i>                   | Herbaceous |
| <i>Gentiana siphonantha</i>                  | Herbaceous |
| <i>Gentiana squarrosa</i>                    | Herbaceous |
| <i>Gentiana stipitata</i>                    | Herbaceous |
| <i>Gentiana straminea</i>                    | Herbaceous |
| <i>Gentiana striata</i>                      | Herbaceous |
| <i>Gentiana szechenyii</i>                   | Herbaceous |
| <i>Gentiana vandelliioides</i>               | Herbaceous |
| <i>Gentiana veitchiorum</i>                  | Herbaceous |
| <i>Gentianella azurea</i>                    | Herbaceous |
| <i>Gentianella pygmaea</i>                   | Herbaceous |
| <i>Gentianopsis barbata</i>                  | Herbaceous |
| <i>Gentianopsis barbata var. stenocalyx</i>  | Herbaceous |
| <i>Gentianopsis paludosa</i>                 | Herbaceous |
| <i>Geranium albiflorum</i>                   | Herbaceous |
| <i>Geranium platyanthum</i>                  | Herbaceous |
| <i>Geranium pratense</i>                     | Herbaceous |
| <i>Geranium pylzowianum</i>                  | Herbaceous |
| <i>Geranium sibiricum</i>                    | Herbaceous |
| <i>Geum aleppicum</i>                        | Herbaceous |
| <i>Glaux maritima</i>                        | Herbaceous |
| <i>Glycyrrhiza uralensis</i>                 | Herbaceous |
| <i>Goldbachia laevigata</i>                  | Herbaceous |
| <i>Halenia elliptica</i>                     | Herbaceous |
| <i>Halerpestes sarmentosa</i>                | Herbaceous |
| <i>Halerpestes tricuspis</i>                 | Herbaceous |
| <i>Halerpestes tricuspis var. intermedia</i> | Herbaceous |
| <i>Halogeton arachnoideus</i>                | Herbaceous |
| <i>Halogeton glomeratus</i>                  | Herbaceous |



|                                               |            |
|-----------------------------------------------|------------|
| <i>Haloxylon ammodendron</i>                  | Woody      |
| <i>Hedysarum algidum</i>                      | Herbaceous |
| <i>Hedysarum sikkimense</i>                   | Herbaceous |
| <i>Hedysarum tanguticum</i>                   | Herbaceous |
| <i>Helictotrichon hookeri</i>                 | Herbaceous |
| <i>Helictotrichon tibeticum</i>               | Herbaceous |
| <i>Heracleum candicans</i>                    | Herbaceous |
| <i>Heracleum millefolium</i>                  | Herbaceous |
| <i>Herminium alaschanicum</i>                 | Herbaceous |
| <i>Herminium monorchis</i>                    | Herbaceous |
| <i>Hippolytia desmantha</i>                   | Herbaceous |
| <i>Hippophae neurocarpa</i>                   | Woody      |
| <i>Hippophae rhamnoides</i>                   | Woody      |
| <i>Hippophae rhamnoides subsp. sinensis</i>   | Woody      |
| <i>Hippophae tibetana</i>                     | Woody      |
| <i>Hippuris vulgaris</i>                      | Herbaceous |
| <i>Hordeum bogdanii</i>                       | Herbaceous |
| <i>Hordeum brevisubulatum</i>                 | Herbaceous |
| <i>Hordeum roshevitzii</i>                    | Herbaceous |
| <i>Hydrangea bretschneideri</i>               | Woody      |
| <i>Hyoscyamus niger</i>                       | Herbaceous |
| <i>Hypecoum leptocarpum</i>                   | Herbaceous |
| <i>Hypericum przewalskii</i>                  | Herbaceous |
| <i>Incarvillea berezovskii</i>                | Herbaceous |
| <i>Incarvillea compacta</i>                   | Herbaceous |
| <i>Incarvillea sinensis var. przewalskii</i>  | Herbaceous |
| <i>Inula japonica</i>                         | Herbaceous |
| <i>Inula salsoloides</i>                      | Herbaceous |
| <i>Iris lactea</i>                            | Herbaceous |
| <i>Iris potaninii</i>                         | Herbaceous |
| <i>Iris songarica</i>                         | Herbaceous |
| <i>Isolepis setacea</i>                       | Herbaceous |
| <i>Isopyrum anemonoides</i>                   | Herbaceous |
| <i>Ixeris chinensis</i>                       | Herbaceous |
| <i>Ixeris chinensis subsp. versicolor</i>     | Herbaceous |
| <i>Juncus allioides</i>                       | Herbaceous |
| <i>Juncus bufonius</i>                        | Herbaceous |
| <i>Juncus castaneus</i>                       | Herbaceous |
| <i>Juncus thomsonii</i>                       | Herbaceous |
| <i>Juniperus chinensis</i>                    | Woody      |
| <i>Juniperus formosana</i>                    | Woody      |
| <i>Juniperus przewalskii</i>                  | Woody      |
| <i>Juniperus tibetica</i>                     | Woody      |
| <i>Kalidium cuspidatum</i>                    | Woody      |
| <i>Kalidium cuspidatum var. sinicum</i>       | Woody      |
| <i>Kalidium foliatum</i>                      | Woody      |
| <i>Kalidium gracile</i>                       | Woody      |
| <i>Kengyilia grandiglumis</i>                 | Herbaceous |
| <i>Kengyilia hirsuta</i>                      | Herbaceous |
| <i>Kengyilia melanthera</i>                   | Herbaceous |
| <i>Kengyilia mutica</i>                       | Herbaceous |
| <i>Kengyilia stenachyra</i>                   | Herbaceous |
| <i>Kengyilia thoroldiana</i>                  | Herbaceous |
| <i>Klasea centauroides subsp. strangulata</i> | Herbaceous |
| <i>Kobresia capillifolia</i>                  | Herbaceous |
| <i>Kobresia esenbeckii</i>                    | Herbaceous |
| <i>Kobresia filifolia</i>                     | Herbaceous |
| <i>Kobresia humilis</i>                       | Herbaceous |
| <i>Kobresia kansuensis</i>                    | Herbaceous |
| <i>Kobresia macrantha</i>                     | Herbaceous |
| <i>Kobresia myosuroides</i>                   | Herbaceous |
| <i>Kobresia pusilla</i>                       | Herbaceous |
| <i>Kobresia pygmaea</i>                       | Herbaceous |
| <i>Kobresia robusta</i>                       | Herbaceous |
| <i>Kobresia royleana</i>                      | Herbaceous |
| <i>Kobresia schoenoides</i>                   | Herbaceous |

|                                                 |            |
|-------------------------------------------------|------------|
| <i>Kobresia vidua</i>                           | Herbaceous |
| <i>Kochia scoparia</i>                          | Herbaceous |
| <i>Kochia scoparia</i> var. <i>sieversiana</i>  | Herbaceous |
| <i>Koeleria asiatica</i>                        | Herbaceous |
| <i>Koeleria cristata</i> var. <i>poaeformis</i> | Herbaceous |
| <i>Koeleria litvinowii</i>                      | Herbaceous |
| <i>Koeleria macrantha</i>                       | Herbaceous |
| <i>Koenigia islandica</i>                       | Herbaceous |
| <i>Krascheninnikovia ceratoides</i>             | Herbaceous |
| <i>Lactuca tatarica</i>                         | Herbaceous |
| <i>Lagopsis supina</i>                          | Herbaceous |
| <i>Lagotis brachystachya</i>                    | Herbaceous |
| <i>Lagotis brevituba</i>                        | Herbaceous |
| <i>Lamiophlomis rotata</i>                      | Herbaceous |
| <i>Lamium amplexicaule</i>                      | Herbaceous |
| <i>Lancea tibetica</i>                          | Herbaceous |
| <i>Lappula consanguinea</i>                     | Herbaceous |
| <i>Lappula redowskii</i>                        | Herbaceous |
| <i>Lathyrus quinquenervius</i>                  | Herbaceous |
| <i>Leibnitzia anandria</i>                      | Herbaceous |
| <i>Leontopodium calocephalum</i>                | Herbaceous |
| <i>Leontopodium dedekensii</i>                  | Herbaceous |
| <i>Leontopodium haplophylloides</i>             | Herbaceous |
| <i>Leontopodium junpeianum</i>                  | Herbaceous |
| <i>Leontopodium leontopodioides</i>             | Herbaceous |
| <i>Leontopodium nanum</i>                       | Herbaceous |
| <i>Leontopodium ochroleucum</i>                 | Herbaceous |
| <i>Leontopodium pusillum</i>                    | Herbaceous |
| <i>Leontopodium souliei</i>                     | Herbaceous |
| <i>Lepidium apetalum</i>                        | Herbaceous |
| <i>Lepidium capitatum</i>                       | Herbaceous |
| <i>Lepidium cordatum</i>                        | Herbaceous |
| <i>Lepidium latifolium</i>                      | Herbaceous |
| <i>Lepidium obtusum</i>                         | Herbaceous |
| <i>Lepisorus clathratus</i>                     | Herbaceous |
| <i>Lepyrodiclis holosteoides</i>                | Herbaceous |
| <i>Lespedeza davurica</i>                       | Herbaceous |
| <i>Lespedeza potaninii</i>                      | Herbaceous |
| <i>Leymus angustus</i>                          | Herbaceous |
| <i>Leymus secalinus</i>                         | Herbaceous |
| <i>Libanotis depressa</i>                       | Herbaceous |
| <i>Ligularia liatroides</i>                     | Herbaceous |
| <i>Ligularia przewalskii</i>                    | Herbaceous |
| <i>Ligularia sagitta</i>                        | Herbaceous |
| <i>Ligularia tangutorum</i>                     | Herbaceous |
| <i>Ligularia virgaurea</i>                      | Herbaceous |
| <i>Ligusticum moniliforme</i>                   | Herbaceous |
| <i>Ligusticum thomsonii</i>                     | Herbaceous |
| <i>Lilium pumilum</i>                           | Herbaceous |
| <i>Limonium aureum</i>                          | Herbaceous |
| <i>Linum perenne</i>                            | Herbaceous |
| <i>Littledalea przewalskyi</i>                  | Herbaceous |
| <i>Littledalea racemosa</i>                     | Herbaceous |
| <i>Lloydia serotina</i>                         | Herbaceous |
| <i>Lomatogonium bellum</i>                      | Herbaceous |
| <i>Lomatogonium carinthiacum</i>                | Herbaceous |
| <i>Lomatogonium gamosepalum</i>                 | Herbaceous |
| <i>Lomatogonium macranthum</i>                  | Herbaceous |
| <i>Lomatogonium rotatum</i>                     | Herbaceous |
| <i>Lonicera caerulea</i>                        | Woody      |
| <i>Lonicera chrysantha</i>                      | Woody      |
| <i>Lonicera ferdinandi</i>                      | Woody      |
| <i>Lonicera hispidula</i>                       | Woody      |
| <i>Lonicera microphylla</i>                     | Woody      |
| <i>Lonicera nervosa</i>                         | Woody      |
| <i>Lonicera rupicola</i>                        | Woody      |

|                                                  |            |
|--------------------------------------------------|------------|
| <i>Lonicera rupicola</i> var. <i>syringantha</i> | Woody      |
| <i>Lonicera tangutica</i>                        | Woody      |
| <i>Lonicera trichosantha</i>                     | Woody      |
| <i>Lonicera webbiana</i>                         | Woody      |
| <i>Lycium barbarum</i>                           | Woody      |
| <i>Lycium dasystemum</i>                         | Woody      |
| <i>Lycium ruthenicum</i>                         | Woody      |
| <i>Maianthemum bifolium</i>                      | Herbaceous |
| <i>Malaxis monophyllos</i>                       | Herbaceous |
| <i>Malcolmia africana</i>                        | Herbaceous |
| <i>Malus transitoria</i>                         | Woody      |
| <i>Malva verticillata</i>                        | Herbaceous |
| <i>Malva verticillata</i> var. <i>rafiqii</i>    | Herbaceous |
| <i>Meconopsis horridula</i>                      | Herbaceous |
| <i>Meconopsis integrifolia</i>                   | Herbaceous |
| <i>Meconopsis punicea</i>                        | Herbaceous |
| <i>Meconopsis quintuplinervia</i>                | Herbaceous |
| <i>Meconopsis racemosa</i>                       | Herbaceous |
| <i>Medicago archiducis-nicolai</i>               | Herbaceous |
| <i>Medicago edgeworthii</i>                      | Herbaceous |
| <i>Medicago lupulina</i>                         | Herbaceous |
| <i>Medicago ruthenica</i>                        | Herbaceous |
| <i>Medicago sativa</i>                           | Herbaceous |
| <i>Melica kozlovii</i>                           | Herbaceous |
| <i>Melica przewalskyi</i>                        | Herbaceous |
| <i>Melica scabrosa</i>                           | Herbaceous |
| <i>Melilotus albus</i>                           | Herbaceous |
| <i>Melilotus officinalis</i>                     | Herbaceous |
| <i>Mentha canadensis</i>                         | Herbaceous |
| <i>Microula blepharolepis</i>                    | Herbaceous |
| <i>Microula diffusa</i>                          | Herbaceous |
| <i>Microula pseudotrichocarpa</i>                | Herbaceous |
| <i>Microula pustulosa</i>                        | Herbaceous |
| <i>Microula rockii</i>                           | Herbaceous |
| <i>Microula sikkimensis</i>                      | Herbaceous |
| <i>Microula tangutica</i>                        | Herbaceous |
| <i>Microula tibetica</i>                         | Herbaceous |
| <i>Microula trichocarpa</i>                      | Herbaceous |
| <i>Morina chinensis</i>                          | Herbaceous |
| <i>Morina kokonorica</i>                         | Herbaceous |
| <i>Myricaria bracteata</i>                       | Woody      |
| <i>Myricaria paniculata</i>                      | Woody      |
| <i>Myricaria prostrata</i>                       | Woody      |
| <i>Myricaria squamosa</i>                        | Woody      |
| <i>Nannoglottis carpesioides</i>                 | Herbaceous |
| <i>Nardostachys jatamansi</i>                    | Herbaceous |
| <i>Neopallasia pectinata</i>                     | Herbaceous |
| <i>Neotorularia humilis</i>                      | Herbaceous |
| <i>Neottianthe cucullata</i>                     | Herbaceous |
| <i>Nepeta coerulescens</i>                       | Herbaceous |
| <i>Nepeta prattii</i>                            | Herbaceous |
| <i>Nitraria sibirica</i>                         | Woody      |
| <i>Nitraria tangutorum</i>                       | Woody      |
| <i>Notopterygium franchetii</i>                  | Herbaceous |
| <i>Notopterygium incisum</i>                     | Herbaceous |
| <i>Olgaea tangutica</i>                          | Herbaceous |
| <i>Orinus kokonorica</i>                         | Herbaceous |
| <i>Oxygraphis glacialis</i>                      | Herbaceous |
| <i>Oxytropis aciphylla</i>                       | Herbaceous |
| <i>Oxytropis deflexa</i>                         | Herbaceous |
| <i>Oxytropis densa</i>                           | Herbaceous |
| <i>Oxytropis falcata</i>                         | Herbaceous |
| <i>Oxytropis glabra</i>                          | Herbaceous |
| <i>Oxytropis imbricata</i>                       | Herbaceous |
| <i>Oxytropis kansuensis</i>                      | Herbaceous |
| <i>Oxytropis latibracteata</i>                   | Herbaceous |

|                                                          |            |
|----------------------------------------------------------|------------|
| <i>Oxytropis melanocalyx</i>                             | Herbaceous |
| <i>Oxytropis merkensis</i>                               | Herbaceous |
| <i>Oxytropis ochrantha</i>                               | Herbaceous |
| <i>Oxytropis ochrocephala</i>                            | Herbaceous |
| <i>Oxytropis proboscidea</i>                             | Herbaceous |
| <i>Oxytropis qinghaiensis</i>                            | Herbaceous |
| <i>Oxytropis stracheyana</i>                             | Herbaceous |
| <i>Oxytropis taochensis</i>                              | Herbaceous |
| <i>Oxytropis tragacanthoides</i>                         | Woody      |
| <i>Oxytropis yunnanensis</i>                             | Herbaceous |
| <i>Padus avium</i>                                       | Woody      |
| <i>Paeonia anomala</i> subsp. <i>veitchii</i>            | Herbaceous |
| <i>Paragymnopteris delavayi</i>                          | Herbaceous |
| <i>Paraquilegia anemonoides</i>                          | Herbaceous |
| <i>Paraquilegia microphylla</i>                          | Herbaceous |
| <i>Parasenecio deltophyllus</i>                          | Herbaceous |
| <i>Parasenecio roborowskii</i>                           | Herbaceous |
| <i>Parietaria micrantha</i>                              | Herbaceous |
| <i>Parnassia lutea</i>                                   | Herbaceous |
| <i>Parnassia oreophila</i>                               | Herbaceous |
| <i>Parnassia trinervis</i>                               | Herbaceous |
| <i>Parnassia viridiflora</i>                             | Herbaceous |
| <i>Pedicularis abrotanifolia</i>                         | Herbaceous |
| <i>Pedicularis alaschanica</i>                           | Herbaceous |
| <i>Pedicularis armata</i>                                | Herbaceous |
| <i>Pedicularis cheilanthifolia</i>                       | Herbaceous |
| <i>Pedicularis chinensis</i>                             | Herbaceous |
| <i>Pedicularis cranolopha</i>                            | Herbaceous |
| <i>Pedicularis croizatiana</i>                           | Herbaceous |
| <i>Pedicularis curviflora</i>                            | Herbaceous |
| <i>Pedicularis gracilis</i> subsp. <i>sinensis</i>       | Herbaceous |
| <i>Pedicularis heydei</i>                                | Herbaceous |
| <i>Pedicularis ingens</i>                                | Herbaceous |
| <i>Pedicularis integrifolia</i>                          | Herbaceous |
| <i>Pedicularis kansuensis</i>                            | Herbaceous |
| <i>Pedicularis kansuensis</i> subsp. <i>kokonorica</i>   | Herbaceous |
| <i>Pedicularis lachnoglossa</i>                          | Herbaceous |
| <i>Pedicularis lasiophrys</i>                            | Herbaceous |
| <i>Pedicularis longiflora</i>                            | Herbaceous |
| <i>Pedicularis longiflora</i> var. <i>tubiformis</i>     | Herbaceous |
| <i>Pedicularis lyrata</i>                                | Herbaceous |
| <i>Pedicularis muscicola</i>                             | Herbaceous |
| <i>Pedicularis oederi</i>                                | Herbaceous |
| <i>Pedicularis oederi</i> var. <i>sinensis</i>           | Herbaceous |
| <i>Pedicularis pheulpinii</i> subsp. <i>chilienensis</i> | Herbaceous |
| <i>Pedicularis pilostachya</i>                           | Herbaceous |
| <i>Pedicularis plicata</i>                               | Herbaceous |
| <i>Pedicularis przewalskii</i>                           | Herbaceous |
| <i>Pedicularis pseudomelampyriflora</i>                  | Herbaceous |
| <i>Pedicularis rhinanthoides</i>                         | Herbaceous |
| <i>Pedicularis rhinanthoides</i> subsp. <i>labellata</i> | Herbaceous |
| <i>Pedicularis roborowskii</i>                           | Herbaceous |
| <i>Pedicularis rudis</i>                                 | Herbaceous |
| <i>Pedicularis scolopax</i>                              | Herbaceous |
| <i>Pedicularis semitorta</i>                             | Herbaceous |
| <i>Pedicularis szetschuanica</i>                         | Herbaceous |
| <i>Pedicularis ternata</i>                               | Herbaceous |
| <i>Pedicularis trichoglossa</i>                          | Herbaceous |
| <i>Pedicularis verticillata</i>                          | Herbaceous |
| <i>Peganum multisectum</i>                               | Herbaceous |
| <i>Pennisetum alopecuroides</i>                          | Herbaceous |
| <i>Pennisetum flaccidum</i>                              | Herbaceous |
| <i>Phedimus aizoon</i>                                   | Herbaceous |
| <i>Philadelphus incanus</i>                              | Woody      |
| <i>Philadelphus kansuensis</i>                           | Woody      |
| <i>Phlomis dentosa</i>                                   | Herbaceous |

|                                                        |            |
|--------------------------------------------------------|------------|
| <i>Phragmites australis</i>                            | Herbaceous |
| <i>Phyllobium heydei</i>                               | Herbaceous |
| <i>Phyllobium tribulifolium</i>                        | Herbaceous |
| <i>Picea asperata</i>                                  | Woody      |
| <i>Picea crassifolia</i>                               | Woody      |
| <i>Picea likiangensis</i> var. <i>rubescens</i>        | Woody      |
| <i>Picea purpurea</i>                                  | Woody      |
| <i>Picea wilsonii</i>                                  | Woody      |
| <i>Picris japonica</i>                                 | Herbaceous |
| <i>Pimpinella smithii</i>                              | Herbaceous |
| <i>Pinus tabuliformis</i>                              | Woody      |
| <i>Piptatherum munroi</i>                              | Herbaceous |
| <i>Pisum sativum</i>                                   | Herbaceous |
| <i>Plantago depressa</i>                               | Herbaceous |
| <i>Plantago minuta</i>                                 | Herbaceous |
| <i>Platycladus orientalis</i>                          | Woody      |
| <i>Pleurospermum franchetianum</i>                     | Herbaceous |
| <i>Pleurospermum hedinii</i>                           | Herbaceous |
| <i>Pleurospermum hookeri</i> var. <i>thomsonii</i>     | Herbaceous |
| <i>Pleurospermum pulszkyi</i>                          | Herbaceous |
| <i>Pleurospermum szechenyii</i>                        | Herbaceous |
| <i>Pleurospermum tsekuense</i>                         | Herbaceous |
| <i>Pleurospermum wilsonii</i>                          | Herbaceous |
| <i>Pleurospermum wrightianum</i>                       | Herbaceous |
| <i>Plumbagella micrantha</i>                           | Herbaceous |
| <i>Poa abbreviata</i>                                  | Herbaceous |
| <i>Poa albertii</i>                                    | Herbaceous |
| <i>Poa annua</i>                                       | Herbaceous |
| <i>Poa araratica</i>                                   | Herbaceous |
| <i>Poa araratica</i> subsp. <i>ianthina</i>            | Herbaceous |
| <i>Poa attenuata</i>                                   | Herbaceous |
| <i>Poa hylobates</i>                                   | Herbaceous |
| <i>Poa pratensis</i>                                   | Herbaceous |
| <i>Poa pratensis</i> subsp. <i>alpigena</i>            | Herbaceous |
| <i>Poa tibetica</i>                                    | Herbaceous |
| <i>Poa versicolor</i> subsp. <i>orinosa</i>            | Herbaceous |
| <i>Polemonium caeruleum</i>                            | Herbaceous |
| <i>Polygala sibirica</i>                               | Herbaceous |
| <i>Polygonatum acuminatifolium</i>                     | Herbaceous |
| <i>Polygonatum cirrhifolium</i>                        | Herbaceous |
| <i>Polygonatum odoratum</i>                            | Herbaceous |
| <i>Polygonatum sibiricum</i>                           | Herbaceous |
| <i>Polygonatum verticillatum</i>                       | Herbaceous |
| <i>Polygonum acerosum</i>                              | Herbaceous |
| <i>Polygonum amphibium</i>                             | Herbaceous |
| <i>Polygonum aviculare</i>                             | Herbaceous |
| <i>Polygonum cyanandrum</i>                            | Herbaceous |
| <i>Polygonum divaricatum</i>                           | Herbaceous |
| <i>Polygonum fertile</i>                               | Herbaceous |
| <i>Polygonum glaciale</i>                              | Herbaceous |
| <i>Polygonum hookeri</i>                               | Herbaceous |
| <i>Polygonum hydropiper</i>                            | Herbaceous |
| <i>Polygonum lapathifolium</i>                         | Herbaceous |
| <i>Polygonum lapathifolium</i> var. <i>lanatum</i>     | Herbaceous |
| <i>Polygonum macrophyllum</i>                          | Herbaceous |
| <i>Polygonum macrophyllum</i> var. <i>stenophyllum</i> | Herbaceous |
| <i>Polygonum nepalense</i>                             | Herbaceous |
| <i>Polygonum sibiricum</i>                             | Herbaceous |
| <i>Polygonum sibiricum</i> var. <i>thomsonii</i>       | Herbaceous |
| <i>Polygonum sparsipilosum</i>                         | Herbaceous |
| <i>Polygonum sparsipilosum</i> var. <i>hubertii</i>    | Herbaceous |
| <i>Polygonum viviparum</i>                             | Herbaceous |
| <i>Polygonum viviparum</i> var. <i>tenuifolium</i>     | Herbaceous |
| <i>Polypogon monspeliensis</i>                         | Herbaceous |
| <i>Polystichum sinense</i>                             | Herbaceous |
| <i>Pomatosace filicula</i>                             | Herbaceous |

|                                                        |            |
|--------------------------------------------------------|------------|
| <i>Ponerorchis chusua</i>                              | Herbaceous |
| <i>Populus cathayana</i>                               | Woody      |
| <i>Populus cathayana</i> var. <i>latifolia</i>         | Woody      |
| <i>Populus davidiana</i>                               | Woody      |
| <i>Populus simonii</i>                                 | Woody      |
| <i>Potentilla acaulis</i>                              | Herbaceous |
| <i>Potentilla angustiloba</i>                          | Herbaceous |
| <i>Potentilla anserina</i>                             | Herbaceous |
| <i>Potentilla bifurca</i>                              | Herbaceous |
| <i>Potentilla bifurca</i> var. <i>humilior</i>         | Herbaceous |
| <i>Potentilla fruticosa</i>                            | Woody      |
| <i>Potentilla fruticosa</i> var. <i>albicans</i>       | Woody      |
| <i>Potentilla glabra</i>                               | Woody      |
| <i>Potentilla glabra</i> var. <i>mandshurica</i>       | Woody      |
| <i>Potentilla granulosa</i>                            | Herbaceous |
| <i>Potentilla multicaulis</i>                          | Herbaceous |
| <i>Potentilla multifida</i>                            | Herbaceous |
| <i>Potentilla multifida</i> var. <i>nubigena</i>       | Herbaceous |
| <i>Potentilla multifida</i> var. <i>ornithopoda</i>    | Herbaceous |
| <i>Potentilla nivea</i>                                | Herbaceous |
| <i>Potentilla parvifolia</i>                           | Woody      |
| <i>Potentilla plumosa</i>                              | Herbaceous |
| <i>Potentilla potaninii</i>                            | Herbaceous |
| <i>Potentilla saundersiana</i>                         | Herbaceous |
| <i>Potentilla saundersiana</i> var. <i>caespitosa</i>  | Herbaceous |
| <i>Potentilla saundersiana</i> var. <i>subpinnata</i>  | Herbaceous |
| <i>Potentilla sischanensis</i>                         | Herbaceous |
| <i>Potentilla sischanensis</i> var. <i>peterae</i>     | Herbaceous |
| <i>Potentilla tanacetifolia</i>                        | Herbaceous |
| <i>Primula advena</i>                                  | Herbaceous |
| <i>Primula nutans</i>                                  | Herbaceous |
| <i>Primula sikkimensis</i>                             | Herbaceous |
| <i>Primula stenocalyx</i>                              | Herbaceous |
| <i>Primula tangutica</i>                               | Herbaceous |
| <i>Primula woodwardii</i>                              | Herbaceous |
| <i>Prunus salicina</i>                                 | Woody      |
| <i>Przewalskia tangutica</i>                           | Herbaceous |
| <i>Pseudostellaria heterantha</i>                      | Herbaceous |
| <i>Pterocephalus hookeri</i>                           | Herbaceous |
| <i>Pterygocalyx volubilis</i>                          | Herbaceous |
| <i>Ptilagrostis concinna</i>                           | Herbaceous |
| <i>Ptilagrostis dichotoma</i>                          | Herbaceous |
| <i>Puccinellia altaica</i>                             | Herbaceous |
| <i>Puccinellia tenuiflora</i>                          | Herbaceous |
| <i>Pulicaria insignis</i>                              | Herbaceous |
| <i>Pulsatilla ambigua</i>                              | Herbaceous |
| <i>Pycnoplathus uniflora</i>                           | Herbaceous |
| <i>Ranunculus brotherusii</i>                          | Herbaceous |
| <i>Ranunculus chinensis</i>                            | Herbaceous |
| <i>Ranunculus furcatifidus</i>                         | Herbaceous |
| <i>Ranunculus glareosus</i>                            | Herbaceous |
| <i>Ranunculus hirtellus</i> var. <i>orientalis</i>     | Herbaceous |
| <i>Ranunculus indivisus</i>                            | Herbaceous |
| <i>Ranunculus japonicus</i>                            | Herbaceous |
| <i>Ranunculus membranaceus</i>                         | Herbaceous |
| <i>Ranunculus nephelogenes</i>                         | Herbaceous |
| <i>Ranunculus nephelogenes</i> var. <i>longicaulis</i> | Herbaceous |
| <i>Ranunculus pulchellus</i>                           | Herbaceous |
| <i>Ranunculus tanguticus</i>                           | Herbaceous |
| <i>Reaumuria kaschgarica</i>                           | Herbaceous |
| <i>Reaumuria soongarica</i>                            | Woody      |
| <i>Rhamnus tangutica</i>                               | Woody      |
| <i>Rhaponticum repens</i>                              | Herbaceous |
| <i>Rheum likiangense</i>                               | Herbaceous |
| <i>Rheum moorcroftianum</i>                            | Herbaceous |
| <i>Rheum palmatum</i>                                  | Herbaceous |

|                                                             |            |
|-------------------------------------------------------------|------------|
| <i>Rheum przewalskyi</i>                                    | Herbaceous |
| <i>Rheum pumilum</i>                                        | Herbaceous |
| <i>Rheum reticulatum</i>                                    | Herbaceous |
| <i>Rheum rhomboideum</i>                                    | Herbaceous |
| <i>Rheum spiciforme</i>                                     | Herbaceous |
| <i>Rheum tanguticum</i>                                     | Herbaceous |
| <i>Rhodiola coccinea</i>                                    | Herbaceous |
| <i>Rhodiola dumulosa</i>                                    | Herbaceous |
| <i>Rhodiola kirilowii</i>                                   | Herbaceous |
| <i>Rhodiola quadrifida</i>                                  | Herbaceous |
| <i>Rhodiola tangutica</i>                                   | Herbaceous |
| <i>Rhododendron anthopogonoides</i>                         | Woody      |
| <i>Rhododendron capitatum</i>                               | Woody      |
| <i>Rhododendron magniflorum</i>                             | Woody      |
| <i>Rhododendron nivale</i>                                  | Woody      |
| <i>Rhododendron przewalskii</i>                             | Woody      |
| <i>Rhododendron przewalskii</i> subsp. <i>chrysophyllum</i> | Woody      |
| <i>Rhododendron thymifolium</i>                             | Woody      |
| <i>Ribes alpestre</i>                                       | Woody      |
| <i>Ribes glaciale</i>                                       | Woody      |
| <i>Ribes himalense</i>                                      | Woody      |
| <i>Ribes himalense</i> var. <i>verruculosum</i>             | Woody      |
| <i>Ribes meyeri</i>                                         | Woody      |
| <i>Ribes pseudofasciculatum</i>                             | Woody      |
| <i>Ribes stenocarpum</i>                                    | Woody      |
| <i>Rorippa palustris</i>                                    | Herbaceous |
| <i>Rosa giraldii</i>                                        | Woody      |
| <i>Rosa moyesii</i>                                         | Woody      |
| <i>Rosa omeiensis</i>                                       | Woody      |
| <i>Rosa sweginzowii</i>                                     | Woody      |
| <i>Rosa willmottiae</i>                                     | Woody      |
| <i>Rubia cordifolia</i>                                     | Herbaceous |
| <i>Rubia sylvatica</i>                                      | Herbaceous |
| <i>Rubus irritans</i>                                       | Herbaceous |
| <i>Rumex acetosa</i>                                        | Herbaceous |
| <i>Rumex aquaticus</i>                                      | Herbaceous |
| <i>Rumex crispus</i>                                        | Herbaceous |
| <i>Rumex longifolius</i>                                    | Herbaceous |
| <i>Rumex nepalensis</i>                                     | Herbaceous |
| <i>Rumex patientia</i>                                      | Herbaceous |
| <i>Salicornia europaea</i>                                  | Herbaceous |
| <i>Salix atopantha</i>                                      | Woody      |
| <i>Salix cheilophila</i>                                    | Woody      |
| <i>Salix lamashanensis</i>                                  | Woody      |
| <i>Salix myrtilleacea</i>                                   | Woody      |
| <i>Salix oritrepha</i>                                      | Woody      |
| <i>Salix oritrepha</i> var. <i>amnematchinensis</i>         | Woody      |
| <i>Salix paraplesia</i>                                     | Woody      |
| <i>Salix rehderiana</i>                                     | Woody      |
| <i>Salix sclerophylla</i>                                   | Woody      |
| <i>Salix sinica</i>                                         | Woody      |
| <i>Salix spathulifolia</i>                                  | Woody      |
| <i>Salix taoensis</i>                                       | Woody      |
| <i>Salsola abrotanoides</i>                                 | Herbaceous |
| <i>Salsola collina</i>                                      | Herbaceous |
| <i>Salsola tragus</i>                                       | Herbaceous |
| <i>Salvia prattii</i>                                       | Herbaceous |
| <i>Salvia przewalskii</i>                                   | Herbaceous |
| <i>Salvia roborowskii</i>                                   | Herbaceous |
| <i>Sambucus adnata</i>                                      | Herbaceous |
| <i>Sanguisorba officinalis</i>                              | Herbaceous |
| <i>Sanicula giraldii</i>                                    | Herbaceous |
| <i>Saussurea acrophila</i>                                  | Herbaceous |
| <i>Saussurea amara</i>                                      | Herbaceous |
| <i>Saussurea andryaloides</i>                               | Herbaceous |
| <i>Saussurea apus</i>                                       | Herbaceous |

|                                    |            |
|------------------------------------|------------|
| <i>Saussurea arenaria</i>          | Herbaceous |
| <i>Saussurea aster</i>             | Herbaceous |
| <i>Saussurea brunneopilosa</i>     | Herbaceous |
| <i>Saussurea cana</i>              | Herbaceous |
| <i>Saussurea daurica</i>           | Herbaceous |
| <i>Saussurea depsangensis</i>      | Herbaceous |
| <i>Saussurea dzeurensis</i>        | Herbaceous |
| <i>Saussurea epilobioides</i>      | Herbaceous |
| <i>Saussurea erubescens</i>        | Herbaceous |
| <i>Saussurea globosa</i>           | Herbaceous |
| <i>Saussurea gnaphalodes</i>       | Herbaceous |
| <i>Saussurea graminea</i>          | Herbaceous |
| <i>Saussurea hieracioides</i>      | Herbaceous |
| <i>Saussurea inversa</i>           | Herbaceous |
| <i>Saussurea katochaete</i>        | Herbaceous |
| <i>Saussurea leontodontoides</i>   | Herbaceous |
| <i>Saussurea medusa</i>            | Herbaceous |
| <i>Saussurea merinoi</i>           | Herbaceous |
| <i>Saussurea minuta</i>            | Herbaceous |
| <i>Saussurea nigrescens</i>        | Herbaceous |
| <i>Saussurea parviflora</i>        | Herbaceous |
| <i>Saussurea paxiana</i>           | Herbaceous |
| <i>Saussurea phaeantha</i>         | Herbaceous |
| <i>Saussurea przewalskii</i>       | Herbaceous |
| <i>Saussurea semifasciata</i>      | Herbaceous |
| <i>Saussurea stella</i>            | Herbaceous |
| <i>Saussurea subulata</i>          | Herbaceous |
| <i>Saussurea subuliquama</i>       | Herbaceous |
| <i>Saussurea superba</i>           | Herbaceous |
| <i>Saussurea sylvatica</i>         | Herbaceous |
| <i>Saussurea tangutica</i>         | Herbaceous |
| <i>Saussurea tatsienensis</i>      | Herbaceous |
| <i>Saussurea thoroldii</i>         | Herbaceous |
| <i>Saussurea tibetica</i>          | Herbaceous |
| <i>Saussurea tsoongii</i>          | Herbaceous |
| <i>Saussurea wellbyi</i>           | Herbaceous |
| <i>Saussurea woodiana</i>          | Herbaceous |
| <i>Saxifraga atrata</i>            | Herbaceous |
| <i>Saxifraga consanguinea</i>      | Herbaceous |
| <i>Saxifraga egregia</i>           | Herbaceous |
| <i>Saxifraga heleonastes</i>       | Herbaceous |
| <i>Saxifraga hirculus</i>          | Herbaceous |
| <i>Saxifraga melanocentra</i>      | Herbaceous |
| <i>Saxifraga nanella</i>           | Herbaceous |
| <i>Saxifraga przewalskii</i>       | Herbaceous |
| <i>Saxifraga pseudohirculus</i>    | Herbaceous |
| <i>Saxifraga signata</i>           | Herbaceous |
| <i>Saxifraga sinomontana</i>       | Herbaceous |
| <i>Saxifraga tangutica</i>         | Herbaceous |
| <i>Saxifraga tibetica</i>          | Herbaceous |
| <i>Saxifraga unguiculata</i>       | Herbaceous |
| <i>Scorzonera albicaulis</i>       | Herbaceous |
| <i>Scorzonera mongolica</i>        | Herbaceous |
| <i>Scorzonera pseudodivaricata</i> | Herbaceous |
| <i>Scrophularia incisa</i>         | Herbaceous |
| <i>Scutellaria scordifolia</i>     | Herbaceous |
| <i>Sedum celatum</i>               | Herbaceous |
| <i>Sedum fischeri</i>              | Herbaceous |
| <i>Sedum glaebosum</i>             | Herbaceous |
| <i>Sedum przewalskii</i>           | Herbaceous |
| <i>Sedum roborowskii</i>           | Herbaceous |
| <i>Sedum tsinghaicum</i>           | Herbaceous |
| <i>Sedum ulricae</i>               | Herbaceous |
| <i>Senecio argunensis</i>          | Herbaceous |
| <i>Senecio diversipinnus</i>       | Herbaceous |
| <i>Senecio dubitabilis</i>         | Herbaceous |



|                                                      |            |
|------------------------------------------------------|------------|
| <i>Senecio krascheninnikovii</i>                     | Herbaceous |
| <i>Senecio thianschanicus</i>                        | Herbaceous |
| <i>Senecio vulgaris</i>                              | Herbaceous |
| <i>Setaria viridis</i>                               | Herbaceous |
| <i>Sibbaldia adpressa</i>                            | Herbaceous |
| <i>Sibbaldia procumbens</i> var. <i>aphanopetala</i> | Herbaceous |
| <i>Sibbaldia tetrandra</i>                           | Herbaceous |
| <i>Sibiraea angustata</i>                            | Woody      |
| <i>Sibiraea laevigata</i>                            | Woody      |
| <i>Silene aprica</i>                                 | Herbaceous |
| <i>Silene conoidea</i>                               | Herbaceous |
| <i>Silene gonosperma</i>                             | Herbaceous |
| <i>Silene gracilicaulis</i>                          | Herbaceous |
| <i>Silene graminifolia</i>                           | Herbaceous |
| <i>Silene himalayensis</i>                           | Herbaceous |
| <i>Silene jensseensis</i>                            | Herbaceous |
| <i>Silene kialensis</i>                              | Herbaceous |
| <i>Silene nanggenensis</i>                           | Herbaceous |
| <i>Silene nepalensis</i>                             | Herbaceous |
| <i>Silene nigrescens</i>                             | Herbaceous |
| <i>Silene pterosperma</i>                            | Herbaceous |
| <i>Silene repens</i>                                 | Herbaceous |
| <i>Silene yetii</i>                                  | Herbaceous |
| <i>Sinacalia tangutica</i>                           | Herbaceous |
| <i>Sinocarum vaginatum</i>                           | Herbaceous |
| <i>Sinochasea trigyna</i>                            | Herbaceous |
| <i>Sinopodophyllum hexandrum</i>                     | Herbaceous |
| <i>Sisymbriopsis mollipila</i>                       | Herbaceous |
| <i>Sisymbrium heteromallum</i>                       | Herbaceous |
| <i>Smelowskia tibetica</i>                           | Herbaceous |
| <i>Solanum japonense</i>                             | Herbaceous |
| <i>Solms-Laubachia eurycarpa</i>                     | Herbaceous |
| <i>Sonchus oleraceus</i>                             | Herbaceous |
| <i>Sonchus wightianus</i>                            | Herbaceous |
| <i>Sorbus koehneana</i>                              | Woody      |
| <i>Sorbus tapashana</i>                              | Woody      |
| <i>Sorbus tianschanica</i>                           | Woody      |
| <i>Soroseris erysimoides</i>                         | Herbaceous |
| <i>Soroseris glomerata</i>                           | Herbaceous |
| <i>Soroseris hookeriana</i>                          | Herbaceous |
| <i>Spergularia marina</i>                            | Herbaceous |
| <i>Sphaerophysa salsula</i>                          | Herbaceous |
| <i>Sphallerocarpus gracilis</i>                      | Herbaceous |
| <i>Spiraea alpina</i>                                | Woody      |
| <i>Spiraea mongolica</i>                             | Woody      |
| <i>Spiraea myrtilloides</i>                          | Woody      |
| <i>Spiraea rosthornii</i>                            | Woody      |
| <i>Spiranthes sinensis</i>                           | Herbaceous |
| <i>Stachys sieboldii</i>                             | Herbaceous |
| <i>Stellaria alaschanica</i>                         | Herbaceous |
| <i>Stellaria arenarioides</i>                        | Herbaceous |
| <i>Stellaria decumbens</i>                           | Herbaceous |
| <i>Stellaria decumbens</i> var. <i>pulvinata</i>     | Herbaceous |
| <i>Stellaria dianthifolia</i>                        | Herbaceous |
| <i>Stellaria graminea</i>                            | Herbaceous |
| <i>Stellaria uda</i>                                 | Herbaceous |
| <i>Stellaria umbellata</i>                           | Herbaceous |
| <i>Stellera chamaejasme</i>                          | Herbaceous |
| <i>Stipa aliena</i>                                  | Herbaceous |
| <i>Stipa breviflora</i>                              | Herbaceous |
| <i>Stipa bungeana</i>                                | Herbaceous |
| <i>Stipa capillacea</i>                              | Herbaceous |
| <i>Stipa caucasica</i> subsp. <i>glareosa</i>        | Herbaceous |
| <i>Stipa penicillata</i>                             | Herbaceous |
| <i>Stipa purpurea</i>                                | Herbaceous |
| <i>Stipa sareptana</i> var. <i>krylovii</i>          | Herbaceous |

|                                                    |            |
|----------------------------------------------------|------------|
| <i>Stipa subsessiliflora</i>                       | Herbaceous |
| <i>Stuckenia pectinata</i>                         | Herbaceous |
| <i>Suaeda corniculata</i> var. <i>olufsenii</i>    | Herbaceous |
| <i>Suaeda glauca</i>                               | Herbaceous |
| <i>Suaeda prostrata</i>                            | Herbaceous |
| <i>Swertia alba</i>                                | Herbaceous |
| <i>Swertia bifolia</i>                             | Herbaceous |
| <i>Swertia dichotoma</i>                           | Herbaceous |
| <i>Swertia diluta</i>                              | Herbaceous |
| <i>Swertia erythrosticta</i>                       | Herbaceous |
| <i>Swertia franchetiana</i>                        | Herbaceous |
| <i>Swertia mussotii</i>                            | Herbaceous |
| <i>Swertia przewalskii</i>                         | Herbaceous |
| <i>Swertia tetraptera</i>                          | Herbaceous |
| <i>Swertia wolfgangiana</i>                        | Herbaceous |
| <i>Sympegma regelii</i>                            | Herbaceous |
| <i>Syncalathium disciforme</i>                     | Herbaceous |
| <i>Syringa oblata</i>                              | Woody      |
| <i>Syringa pubescens</i> subsp. <i>microphylla</i> | Woody      |
| <i>Tamarix austromongolica</i>                     | Woody      |
| <i>Tamarix chinensis</i>                           | Woody      |
| <i>Tamarix gracilis</i>                            | Woody      |
| <i>Tamarix laxa</i>                                | Woody      |
| <i>Tamarix ramosissima</i>                         | Woody      |
| <i>Tanacetum barclayanum</i>                       | Herbaceous |
| <i>Tanacetum tatsienense</i>                       | Herbaceous |
| <i>Taphrospermum fontanum</i>                      | Herbaceous |
| <i>Taraxacum albiflos</i>                          | Herbaceous |
| <i>Taraxacum brevirostre</i>                       | Herbaceous |
| <i>Taraxacum dissectum</i>                         | Herbaceous |
| <i>Taraxacum lugubre</i>                           | Herbaceous |
| <i>Taraxacum maurocarpum</i>                       | Herbaceous |
| <i>Taraxacum mongolicum</i>                        | Herbaceous |
| <i>Taraxacum platypecidum</i>                      | Herbaceous |
| <i>Taraxacum sikkimense</i>                        | Herbaceous |
| <i>Tephroseris rufa</i>                            | Herbaceous |
| <i>Thalictrum alpinum</i>                          | Herbaceous |
| <i>Thalictrum alpinum</i> var. <i>elatum</i>       | Herbaceous |
| <i>Thalictrum baicalense</i>                       | Herbaceous |
| <i>Thalictrum foetidum</i>                         | Herbaceous |
| <i>Thalictrum leuconotum</i>                       | Herbaceous |
| <i>Thalictrum minus</i>                            | Herbaceous |
| <i>Thalictrum minus</i> var. <i>hypoleucum</i>     | Herbaceous |
| <i>Thalictrum petaloideum</i>                      | Herbaceous |
| <i>Thalictrum przewalskii</i>                      | Herbaceous |
| <i>Thalictrum rutifolium</i>                       | Herbaceous |
| <i>Thalictrum uncatum</i>                          | Herbaceous |
| <i>Thermopsis alpina</i>                           | Herbaceous |
| <i>Thermopsis fabacea</i>                          | Herbaceous |
| <i>Thermopsis inflata</i>                          | Herbaceous |
| <i>Thermopsis lanceolata</i>                       | Herbaceous |
| <i>Thermopsis przewalskii</i>                      | Herbaceous |
| <i>Thlaspi arvense</i>                             | Herbaceous |
| <i>Thylacospermum caespitosum</i>                  | Herbaceous |
| <i>Tibetia himalaica</i>                           | Herbaceous |
| <i>Tongoloa elata</i>                              | Herbaceous |
| <i>Trichophorum distigmaticum</i>                  | Herbaceous |
| <i>Triglochin maritima</i>                         | Herbaceous |
| <i>Triglochin palustris</i>                        | Herbaceous |
| <i>Trigonotis peduncularis</i>                     | Herbaceous |
| <i>Trigonotis tibetica</i>                         | Herbaceous |
| <i>Trikeria pappiformis</i>                        | Herbaceous |
| <i>Triosteum pinnatifidum</i>                      | Herbaceous |
| <i>Trisetum altaicum</i>                           | Herbaceous |
| <i>Trisetum spicatum</i>                           | Herbaceous |
| <i>Triticum aestivum</i>                           | Herbaceous |

|                                                      |            |
|------------------------------------------------------|------------|
| <i>Trollius farreri</i>                              | Herbaceous |
| <i>Trollius pumilus</i>                              | Herbaceous |
| <i>Trollius pumilus</i> var. <i>tanguticus</i>       | Herbaceous |
| <i>Trollius ranunculoides</i>                        | Herbaceous |
| <i>Tussilago farfara</i>                             | Herbaceous |
| <i>Typha angustifolia</i>                            | Herbaceous |
| <i>Urtica cannabina</i>                              | Herbaceous |
| <i>Urtica dioica</i>                                 | Herbaceous |
| <i>Urtica hyperborea</i>                             | Herbaceous |
| <i>Urtica triangularis</i>                           | Herbaceous |
| <i>Urtica triangularis</i> subsp. <i>pinnatifida</i> | Herbaceous |
| <i>Urtica triangularis</i> subsp. <i>trichocarpa</i> | Herbaceous |
| <i>Vaccaria hispanica</i>                            | Herbaceous |
| <i>Valeriana officinalis</i>                         | Herbaceous |
| <i>Valeriana tangutica</i>                           | Herbaceous |
| <i>Veronica anagallis-aquatica</i>                   | Herbaceous |
| <i>Veronica biloba</i>                               | Herbaceous |
| <i>Veronica ciliata</i>                              | Herbaceous |
| <i>Veronica eriogyne</i>                             | Herbaceous |
| <i>Veronica rockii</i>                               | Herbaceous |
| <i>Veronica vandellioides</i>                        | Herbaceous |
| <i>Viburnum farreri</i>                              | Woody      |
| <i>Viburnum mongolicum</i>                           | Woody      |
| <i>Vicatia thibetica</i>                             | Herbaceous |
| <i>Vicia amoena</i>                                  | Herbaceous |
| <i>Vicia bungei</i>                                  | Herbaceous |
| <i>Vicia cracca</i>                                  | Herbaceous |
| <i>Vicia japonica</i>                                | Herbaceous |
| <i>Vicia megalotropis</i>                            | Herbaceous |
| <i>Vicia multicaulis</i>                             | Herbaceous |
| <i>Vicia sativa</i>                                  | Herbaceous |
| <i>Vicia sativa</i> subsp. <i>nigra</i>              | Herbaceous |
| <i>Vicia unijuga</i>                                 | Herbaceous |
| <i>Viola biflora</i>                                 | Herbaceous |
| <i>Viola biflora</i> var. <i>rockiana</i>            | Herbaceous |
| <i>Viola bulbosa</i>                                 | Herbaceous |
| <i>Viola kunawarensis</i>                            | Herbaceous |
| <i>Woodsia andersonii</i>                            | Herbaceous |
| <i>Xanthium strumarium</i>                           | Herbaceous |
| <i>Xanthopappus subacaulis</i>                       | Herbaceous |
| <i>Youngia simulatrix</i>                            | Herbaceous |

**Table S2.** Probability of plant distribution in Qinghai Province under different climate scenarios.

| Species                                        | Current | ssp245 | ssp585 |
|------------------------------------------------|---------|--------|--------|
| <i>Acanthocalyx alba</i>                       | 0.3587  | 0.3633 | 0.3731 |
| <i>Achnatherum breviaristatum</i>              | 0.4404  | 0.4666 | 0.5112 |
| <i>Achnatherum inebrians</i>                   | 0.2728  | 0.2729 | 0.2819 |
| <i>Achnatherum psilanthum</i>                  | 0.3116  | 0.3459 | 0.3679 |
| <i>Achnatherum sibiricum</i>                   | 0.2993  | 0.4435 | 0.574  |
| <i>Achnatherum splendens</i>                   | 0.14    | 0.1973 | 0.2539 |
| <i>Aconitum flavum</i>                         | 0.3077  | 0.317  | 0.3229 |
| <i>Aconitum gymnanthum</i>                     | 0.3347  | 0.3298 | 0.317  |
| <i>Aconitum pendulum</i>                       | 0.5129  | 0.5311 | 0.5493 |
| <i>Aconitum sinomontanum</i>                   | 0.4875  | 0.4972 | 0.5143 |
| <i>Aconitum tanguticum</i>                     | 0.206   | 0.3774 | 0.5182 |
| <i>Acronema chinense</i>                       | 0.2901  | 0.5399 | 0.707  |
| <i>Actinocarya tibetica</i>                    | 0.3943  | 0.5311 | 0.6238 |
| <i>Adenophora himalayana</i>                   | 0.283   | 0.4961 | 0.6673 |
| <i>Adenophora liliifolioides</i>               | 0.6177  | 0.6288 | 0.64   |
| <i>Adenophora potaninii</i>                    | 0.5335  | 0.5724 | 0.5381 |
| <i>Adenophora stenanthina</i>                  | 0.4902  | 0.5545 | 0.5994 |
| <i>Adenophora stenanthina subsp. sylvatica</i> | 0.0447  | 0.0478 | 0.0514 |
| <i>Adonis bobroviana</i>                       | 0.4234  | 0.6255 | 0.7816 |
| <i>Adonis coerulea</i>                         | 0.4189  | 0.4565 | 0.4821 |
| <i>Agrimonia pilosa</i>                        | 0.1835  | 0.2224 | 0.249  |
| <i>Agriophyllum squarrosum</i>                 | 0.2218  | 0.2503 | 0.2683 |
| <i>Agropyron cristatum</i>                     | 0.3232  | 0.323  | 0.3249 |
| <i>Agropyron desertorum</i>                    | 0.5845  | 0.6046 | 0.6182 |
| <i>Agrostis gigantea</i>                       | 0.5183  | 0.5946 | 0.6522 |
| <i>Agrostis sozanensis</i>                     | 0.6152  | 0.6428 | 0.6617 |
| <i>Ajania fruticulosa</i>                      | 0.0708  | 0.0789 | 0.0829 |
| <i>Ajania khartensis</i>                       | 0.3217  | 0.3888 | 0.3519 |
| <i>Ajania przewalskii</i>                      | 0.5659  | 0.5929 | 0.6091 |
| <i>Ajania ramosa</i>                           | 0.0946  | 0.1048 | 0.1125 |
| <i>Ajania tenuifolia</i>                       | 0.3627  | 0.5634 | 0.7305 |
| <i>Ajuga lupulina</i>                          | 0.2116  | 0.4219 | 0.5915 |
| <i>Aleuritopteris argentea</i>                 | 0.5034  | 0.639  | 0.7288 |
| <i>Allium aciphyllum</i>                       | 0.6015  | 0.6017 | 0.6356 |
| <i>Allium atrosanguineum</i>                   | 0.1304  | 0.1738 | 0.208  |
| <i>Allium carolinianum</i>                     | 0.1759  | 0.1872 | 0.276  |
| <i>Allium chrysanthum</i>                      | 0.5866  | 0.5852 | 0.6153 |
| <i>Allium chrysocephalum</i>                   | 0.6253  | 0.6253 | 0.6271 |
| <i>Allium cyaneum</i>                          | 0.4761  | 0.4761 | 0.4761 |
| <i>Allium cyathophorum</i>                     | 0.1927  | 0.2035 | 0.1959 |
| <i>Allium fasciculatum</i>                     | 0.373   | 0.413  | 0.3891 |
| <i>Allium herderianum</i>                      | 0.3619  | 0.4548 | 0.5102 |
| <i>Allium mongolicum</i>                       | 0.5839  | 0.5687 | 0.5574 |
| <i>Allium polyrhizum</i>                       | 0.3706  | 0.4705 | 0.5392 |
| <i>Allium prattii</i>                          | 0.2338  | 0.2978 | 0.3917 |
| <i>Allium przewalskianum</i>                   | 0.4719  | 0.5689 | 0.634  |
| <i>Allium ramosum</i>                          | 0.2376  | 0.3391 | 0.3471 |
| <i>Allium rude</i>                             | 0.4798  | 0.5193 | 0.4937 |
| <i>Allium sikkimense</i>                       | 0.0632  | 0.1005 | 0.2164 |
| <i>Allium subangulatum</i>                     | 0.2494  | 0.2769 | 0.2395 |
| <i>Allium tanguticum</i>                       | 0.376   | 0.3719 | 0.3338 |
| <i>Allium yuanum</i>                           | 0.3057  | 0.3373 | 0.3623 |
| <i>Amaranthus retroflexus</i>                  | 0.1549  | 0.2141 | 0.3054 |
| <i>Anaphalis acutifolia</i>                    | 0.621   | 0.6218 | 0.6218 |
| <i>Anaphalis aureopunctata</i>                 | 0.3407  | 0.3952 | 0.4133 |
| <i>Anaphalis bicolor</i>                       | 0.3303  | 0.6172 | 0.8166 |
| <i>Anaphalis flavescens</i>                    | 0.5492  | 0.6172 | 0.6636 |
| <i>Anaphalis hancockii</i>                     | 0.4958  | 0.6128 | 0.7042 |
| <i>Anaphalis lactea</i>                        | 0.4886  | 0.5035 | 0.5129 |
| <i>Anaphalis latialata</i>                     | 0.3796  | 0.5828 | 0.7446 |
| <i>Anaphalis margaritacea</i>                  | 0.1563  | 0.1802 | 0.1949 |
| <i>Anaphalis souliei</i>                       | 0.3452  | 0.4764 | 0.4559 |
| <i>Anchusa ovata</i>                           | 0.385   | 0.6051 | 0.7588 |

|                                                |        |        |        |
|------------------------------------------------|--------|--------|--------|
| <i>Androsace adenocephala</i>                  | 0.5478 | 0.548  | 0.5618 |
| <i>Androsace erecta</i>                        | 0.4538 | 0.4539 | 0.4537 |
| <i>Androsace gmelinii</i> var. <i>geophila</i> | 0.3586 | 0.3783 | 0.4496 |
| <i>Androsace mariae</i>                        | 0.6321 | 0.6321 | 0.6321 |
| <i>Androsace squarrosula</i>                   | 0.4156 | 0.6386 | 0.7895 |
| <i>Androsace tanggulashanensis</i>             | 0.2045 | 0.248  | 0.2738 |
| <i>Androsace tapete</i>                        | 0.4189 | 0.4845 | 0.5215 |
| <i>Androsace yargongensis</i>                  | 0.3109 | 0.4027 | 0.4192 |
| <i>Androsace zambalensis</i>                   | 0.6238 | 0.6237 | 0.6267 |
| <i>Anemone coelestina</i> var. <i>linearis</i> | 0.1849 | 0.3151 | 0.4458 |
| <i>Anemone demissa</i>                         | 0.3437 | 0.5935 | 0.7751 |
| <i>Anemone geum</i> subsp. <i>ovalifolia</i>   | 0.5322 | 0.5639 | 0.5833 |
| <i>Anemone imbricata</i>                       | 0.1459 | 0.2313 | 0.3244 |
| <i>Anemone obtusiloba</i>                      | 0.3594 | 0.4152 | 0.4223 |
| <i>Anemone rivularis</i>                       | 0.5518 | 0.5732 | 0.5898 |
| <i>Anemone tomentosa</i>                       | 0.5419 | 0.4745 | 0.4287 |
| <i>Angelica nitida</i>                         | 0.3879 | 0.4049 | 0.4395 |
| <i>Anisodus tanguticus</i>                     | 0.2113 | 0.2443 | 0.2781 |
| <i>Apocynum pictum</i>                         | 0.2974 | 0.3073 | 0.4128 |
| <i>Aquilegia ecalcarata</i>                    | 0.2962 | 0.4225 | 0.5185 |
| <i>Aquilegia viridiflora</i>                   | 0.4334 | 0.4782 | 0.4649 |
| <i>Arabis pendula</i>                          | 0.63   | 0.6301 | 0.6299 |
| <i>Arenaria brevipetala</i>                    | 0.4583 | 0.4669 | 0.4719 |
| <i>Arenaria bryophylla</i>                     | 0.2067 | 0.1995 | 0.1766 |
| <i>Arenaria forrestii</i>                      | 0.5964 | 0.6094 | 0.631  |
| <i>Arenaria kansuensis</i>                     | 0.2748 | 0.313  | 0.247  |
| <i>Arenaria melanandra</i>                     | 0.4618 | 0.5483 | 0.5298 |
| <i>Arenaria przewalskii</i>                    | 0.3769 | 0.3763 | 0.392  |
| <i>Arenaria roborowskii</i>                    | 0.4906 | 0.4938 | 0.4874 |
| <i>Arenaria saginoides</i>                     | 0.4189 | 0.4188 | 0.4231 |
| <i>Arisaema wardii</i>                         | 0.0593 | 0.0639 | 0.1093 |
| <i>Aristida triseta</i>                        | 0.2461 | 0.5062 | 0.7411 |
| <i>Artemisia adamsii</i>                       | 0.1761 | 0.4052 | 0.6079 |
| <i>Artemisia anethoides</i>                    | 0.3114 | 0.3432 | 0.363  |
| <i>Artemisia annua</i>                         | 0.629  | 0.629  | 0.629  |
| <i>Artemisia campbellii</i>                    | 0.4554 | 0.5882 | 0.6772 |
| <i>Artemisia dalai-lamae</i>                   | 0.2213 | 0.3203 | 0.4001 |
| <i>Artemisia demissa</i>                       | 0.2678 | 0.3766 | 0.4887 |
| <i>Artemisia desertorum</i>                    | 0.3123 | 0.3704 | 0.509  |
| <i>Artemisia dracunculus</i>                   | 0.4244 | 0.4582 | 0.5064 |
| <i>Artemisia dubia</i> var. <i>subdigitata</i> | 0.3853 | 0.5128 | 0.6251 |
| <i>Artemisia duthreuil-de-rhinsi</i>           | 0.1334 | 0.1455 | 0.1521 |
| <i>Artemisia frigida</i>                       | 0.2314 | 0.4706 | 0.5838 |
| <i>Artemisia gmelinii</i>                      | 0.2623 | 0.4338 | 0.5903 |
| <i>Artemisia hedinii</i>                       | 0.535  | 0.5574 | 0.5707 |
| <i>Artemisia leucophylla</i>                   | 0.301  | 0.464  | 0.6424 |
| <i>Artemisia macrocephala</i>                  | 0.3279 | 0.4673 | 0.4602 |
| <i>Artemisia matfeldii</i>                     | 0.1831 | 0.2457 | 0.2615 |
| <i>Artemisia minor</i>                         | 0.291  | 0.4598 | 0.5937 |
| <i>Artemisia mongolica</i>                     | 0.3163 | 0.3753 | 0.503  |
| <i>Artemisia moorcroftiana</i>                 | 0.208  | 0.2671 | 0.3178 |
| <i>Artemisia myriantha</i>                     | 0.2448 | 0.2691 | 0.282  |
| <i>Artemisia nanschanica</i>                   | 0.1783 | 0.3015 | 0.4219 |
| <i>Artemisia pewzowii</i>                      | 0.2242 | 0.3562 | 0.4753 |
| <i>Artemisia phaeolepis</i>                    | 0.4288 | 0.4764 | 0.4814 |
| <i>Artemisia phyllobotrys</i>                  | 0.5653 | 0.5739 | 0.581  |
| <i>Artemisia roxburghiana</i>                  | 0.1487 | 0.163  | 0.1721 |
| <i>Artemisia scoparia</i>                      | 0.3615 | 0.3822 | 0.3948 |
| <i>Artemisia sieversiana</i>                   | 0.386  | 0.3816 | 0.4417 |
| <i>Artemisia stechmanniana</i>                 | 0.1744 | 0.1914 | 0.1946 |
| <i>Artemisia stricta</i>                       | 0.1799 | 0.3216 | 0.4387 |
| <i>Artemisia tangutica</i>                     | 0.5548 | 0.5511 | 0.5489 |
| <i>Artemisia verbenacea</i>                    | 0.5584 | 0.57   | 0.598  |
| <i>Artemisia vestita</i>                       | 0.1673 | 0.3369 | 0.4864 |
| <i>Artemisia vulgaris</i>                      | 0.5998 | 0.6045 | 0.6278 |
| <i>Artemisia waltonii</i>                      | 0.3413 | 0.4378 | 0.4807 |

|                                                   |        |        |        |
|---------------------------------------------------|--------|--------|--------|
| <i>Askellia flexuosa</i>                          | 0.0336 | 0.0428 | 0.0889 |
| <i>Asparagus acicularis</i>                       | 0.3964 | 0.5066 | 0.6113 |
| <i>Asparagus brachyphyllus</i>                    | 0.1954 | 0.437  | 0.7245 |
| <i>Asparagus breslerianus</i>                     | 0.2409 | 0.4438 | 0.6053 |
| <i>Asparagus filicinus</i>                        | 0.4644 | 0.5065 | 0.5333 |
| <i>Asparagus longiflorus</i>                      | 0.1553 | 0.2015 | 0.2332 |
| <i>Asperugo procumbens</i>                        | 0.2426 | 0.3227 | 0.3345 |
| <i>Aster alpinus</i>                              | 0.4076 | 0.4546 | 0.4841 |
| <i>Aster altaicus</i>                             | 0.2674 | 0.2836 | 0.3092 |
| <i>Aster asteroides</i>                           | 0.3182 | 0.4451 | 0.5338 |
| <i>Aster boweri</i>                               | 0.1071 | 0.1174 | 0.1162 |
| <i>Aster crenatifolius</i>                        | 0.2959 | 0.2959 | 0.2959 |
| <i>Aster diplostephioides</i>                     | 0.3843 | 0.4509 | 0.5213 |
| <i>Aster farreri</i>                              | 0.3318 | 0.4141 | 0.4288 |
| <i>Aster flaccidus</i>                            | 0.511  | 0.5393 | 0.5593 |
| <i>Aster gouldii</i>                              | 0.0827 | 0.1021 | 0.1188 |
| <i>Aster hispidus</i>                             | 0.5188 | 0.639  | 0.7207 |
| <i>Aster poliothamnus</i>                         | 0.2234 | 0.2525 | 0.2704 |
| <i>Aster semiprostratus</i>                       | 0.2203 | 0.4264 | 0.6065 |
| <i>Aster souliei</i>                              | 0.6165 | 0.646  | 0.6683 |
| <i>Aster tongolensis</i>                          | 0.3449 | 0.3503 | 0.3927 |
| <i>Aster trinervius</i> subsp. <i>ageratoides</i> | 0.2055 | 0.4223 | 0.5974 |
| <i>Aster yunnanensis</i> var. <i>labrangensis</i> | 0.1744 | 0.184  | 0.1741 |
| <i>Asterothamnus centrali-asiaticus</i>           | 0.0227 | 0.0255 | 0.0269 |
| <i>Astragalus arnoldii</i>                        | 0.2752 | 0.4106 | 0.5197 |
| <i>Astragalus chaidamuensis</i>                   | 0.3873 | 0.5342 | 0.6392 |
| <i>Astragalus chrysopterus</i>                    | 0.2257 | 0.2694 | 0.2228 |
| <i>Astragalus confertus</i>                       | 0.5355 | 0.6475 | 0.7325 |
| <i>Astragalus densiflorus</i>                     | 0.5706 | 0.5974 | 0.6137 |
| <i>Astragalus floridulus</i>                      | 0.5952 | 0.5964 | 0.6115 |
| <i>Astragalus galactites</i>                      | 0.2924 | 0.3254 | 0.3463 |
| <i>Astragalus golmuensis</i>                      | 0.0201 | 0.0221 | 0.0228 |
| <i>Astragalus kukunoricus</i>                     | 0.2661 | 0.3821 | 0.4521 |
| <i>Astragalus laxmannii</i>                       | 0.6238 | 0.6238 | 0.6238 |
| <i>Astragalus licentianus</i>                     | 0.3727 | 0.5181 | 0.4874 |
| <i>Astragalus mahoschanicus</i>                   | 0.1905 | 0.4084 | 0.4696 |
| <i>Astragalus mattam</i>                          | 0.5611 | 0.5632 | 0.5644 |
| <i>Astragalus melilotoides</i>                    | 0.2633 | 0.3713 | 0.4752 |
| <i>Astragalus monadelphus</i>                     | 0.4855 | 0.5346 | 0.5735 |
| <i>Astragalus monbeigii</i>                       | 0.429  | 0.5341 | 0.6257 |
| <i>Astragalus mongholicus</i>                     | 0.3499 | 0.3499 | 0.3499 |
| <i>Astragalus nivalis</i>                         | 0.2189 | 0.3696 | 0.5164 |
| <i>Astragalus peterae</i>                         | 0.3304 | 0.528  | 0.6646 |
| <i>Astragalus polycladus</i>                      | 0.1839 | 0.2097 | 0.3532 |
| <i>Astragalus przewalskii</i>                     | 0.1338 | 0.1392 | 0.14   |
| <i>Astragalus scaberrimus</i>                     | 0.1101 | 0.2297 | 0.3402 |
| <i>Astragalus skythropos</i>                      | 0.484  | 0.5887 | 0.5982 |
| <i>Astragalus strictus</i>                        | 0.2218 | 0.4403 | 0.5144 |
| <i>Astragalus sungpanensis</i>                    | 0.4414 | 0.5775 | 0.6305 |
| <i>Astragalus tenuis</i>                          | 0.2517 | 0.331  | 0.3168 |
| <i>Astragalus tongolensis</i>                     | 0.2346 | 0.2806 | 0.3132 |
| <i>Astragalus variabilis</i>                      | 0.3161 | 0.3454 | 0.3638 |
| <i>Astragalus yunnanensis</i>                     | 0.2628 | 0.3227 | 0.3818 |
| <i>Astragalus zacharensis</i>                     | 0.5619 | 0.6698 | 0.7398 |
| <i>Atriplex centralasiatica</i>                   | 0.34   | 0.3828 | 0.4382 |
| <i>Atriplex sibirica</i>                          | 0.1705 | 0.2146 | 0.2298 |
| <i>Avena fatua</i>                                | 0.3463 | 0.5202 | 0.6667 |
| <i>Bassia dasyphylla</i>                          | 0.5778 | 0.6223 | 0.6497 |
| <i>Batrachium bungei</i>                          | 0.15   | 0.1665 | 0.1872 |
| <i>Beckmannia syzigachne</i>                      | 0.3447 | 0.5746 | 0.7514 |
| <i>Berberis dasystachya</i>                       | 0.1719 | 0.1846 | 0.1544 |
| <i>Berberis diaphana</i>                          | 0.5767 | 0.6032 | 0.6096 |
| <i>Berberis dubia</i>                             | 0.5468 | 0.6765 | 0.7709 |
| <i>Berberis kansuensis</i>                        | 0.305  | 0.5615 | 0.7572 |
| <i>Berberis verna</i>                             | 0.1852 | 0.3918 | 0.5693 |
| <i>Betula albosinensis</i>                        | 0.3653 | 0.5614 | 0.6846 |

|                                                         |        |        |        |
|---------------------------------------------------------|--------|--------|--------|
| <i>Betula platyphylla</i>                               | 0.5592 | 0.6178 | 0.5655 |
| <i>Betula utilis</i>                                    | 0.3105 | 0.369  | 0.4054 |
| <i>Bidens tripartita</i>                                | 0.4633 | 0.653  | 0.7811 |
| <i>Biebersteinia heterostemon</i>                       | 0.5501 | 0.6101 | 0.5793 |
| <i>Blysmus sinocompressus</i>                           | 0.2435 | 0.274  | 0.3774 |
| <i>Bolboschoenus planiculmis</i>                        | 0.4867 | 0.5799 | 0.6674 |
| <i>Bothriospermum kusnezowii</i>                        | 0.5944 | 0.5995 | 0.6092 |
| <i>Braya rosea</i>                                      | 0.3351 | 0.3347 | 0.3372 |
| <i>Bromus japonicus</i>                                 | 0.4438 | 0.4471 | 0.4491 |
| <i>Bromus paulsenii</i>                                 | 0.1654 | 0.3078 | 0.4489 |
| <i>Bromus sinensis</i>                                  | 0.572  | 0.6011 | 0.619  |
| <i>Bromus tectorum</i>                                  | 0.2816 | 0.3275 | 0.3641 |
| <i>Bupleurum commelynoideum</i>                         | 0.0472 | 0.0513 | 0.0523 |
| <i>Bupleurum commelynoideum</i> var. <i>flaviflorum</i> | 0.2318 | 0.3325 | 0.2956 |
| <i>Bupleurum condensatum</i>                            | 0.2628 | 0.3623 | 0.4364 |
| <i>Bupleurum longicaule</i>                             | 0.4833 | 0.4833 | 0.4833 |
| <i>Bupleurum longicaule</i> var. <i>giraldii</i>        | 0.599  | 0.646  | 0.678  |
| <i>Bupleurum malconense</i>                             | 0.1997 | 0.2171 | 0.2355 |
| <i>Bupleurum microcephalum</i>                          | 0.4577 | 0.5086 | 0.5456 |
| <i>Bupleurum smithii</i>                                | 0.3084 | 0.4025 | 0.4395 |
| <i>Bupleurum smithii</i> var. <i>parvifolium</i>        | 0.1353 | 0.1201 | 0.069  |
| <i>Calamagrostis pseudophragmites</i>                   | 0.1382 | 0.1462 | 0.142  |
| <i>Calendula officinalis</i>                            | 0.2663 | 0.5177 | 0.7046 |
| <i>Callianthemum alatavicum</i>                         | 0.1713 | 0.1966 | 0.2124 |
| <i>Callianthemum pimpinelloides</i>                     | 0.4028 | 0.4605 | 0.4494 |
| <i>Calligonum mongolicum</i>                            | 0.2319 | 0.3551 | 0.5639 |
| <i>Calligonum zaidamense</i>                            | 0.2001 | 0.4319 | 0.6909 |
| <i>Caltha scaposa</i>                                   | 0.2783 | 0.437  | 0.5535 |
| <i>Campanula aristata</i>                               | 0.2172 | 0.2382 | 0.2508 |
| <i>Cancrinia maximowiczii</i>                           | 0.2168 | 0.2384 | 0.2341 |
| <i>Cannabis sativa</i>                                  | 0.2606 | 0.4032 | 0.5377 |
| <i>Capsella bursa-pastoris</i>                          | 0.4183 | 0.6683 | 0.8343 |
| <i>Caragana acanthophylla</i>                           | 0.4915 | 0.5655 | 0.5553 |
| <i>Caragana brevifolia</i>                              | 0.489  | 0.5963 | 0.6989 |
| <i>Caragana chinghaiensis</i>                           | 0.3991 | 0.5388 | 0.5848 |
| <i>Caragana erinacea</i>                                | 0.5571 | 0.5649 | 0.6034 |
| <i>Caragana gerardiana</i>                              | 0.2789 | 0.3996 | 0.4714 |
| <i>Caragana jubata</i>                                  | 0.2778 | 0.2828 | 0.2843 |
| <i>Caragana jubata</i> var. <i>recurva</i>              | 0.4578 | 0.482  | 0.5085 |
| <i>Caragana junatovii</i>                               | 0.3251 | 0.3992 | 0.4913 |
| <i>Caragana kozlovii</i>                                | 0.3383 | 0.3383 | 0.3383 |
| <i>Caragana opulens</i>                                 | 0.453  | 0.6152 | 0.7261 |
| <i>Caragana roborovskiyi</i>                            | 0.2395 | 0.3993 | 0.4647 |
| <i>Caragana tangutica</i>                               | 0.2404 | 0.2521 | 0.26   |
| <i>Caragana tibetica</i>                                | 0.4163 | 0.4876 | 0.4839 |
| <i>Cardamine macrophylla</i>                            | 0.3886 | 0.5336 | 0.6774 |
| <i>Cardamine tangutorum</i>                             | 0.1849 | 0.1831 | 0.1871 |
| <i>Carduus acanthoides</i>                              | 0.4282 | 0.5901 | 0.7052 |
| <i>Carduus crispus</i>                                  | 0.4995 | 0.5765 | 0.5169 |
| <i>Carex adrieni</i>                                    | 0.1864 | 0.2928 | 0.2884 |
| <i>Carex atrofusca</i>                                  | 0.5892 | 0.6087 | 0.6204 |
| <i>Carex atrofusca</i> subsp. <i>minor</i>              | 0.2212 | 0.2445 | 0.2586 |
| <i>Carex coriophora</i>                                 | 0.151  | 0.1786 | 0.1963 |
| <i>Carex crebra</i>                                     | 0.2125 | 0.2864 | 0.344  |
| <i>Carex duriuscula</i> subsp. <i>rigescens</i>         | 0.4132 | 0.6888 | 0.8344 |
| <i>Carex haematostoma</i>                               | 0.1676 | 0.2226 | 0.3412 |
| <i>Carex ivanoviae</i>                                  | 0.4387 | 0.5434 | 0.6215 |
| <i>Carex kansuensis</i>                                 | 0.1649 | 0.2097 | 0.233  |
| <i>Carex moorcroftii</i>                                | 0.1531 | 0.1199 | 0.1124 |
| <i>Carex przewalskii</i>                                | 0.3    | 0.4409 | 0.5473 |
| <i>Carex pseudofetida</i>                               | 0.6018 | 0.5982 | 0.5407 |
| <i>Carex scabrirostris</i>                              | 0.1698 | 0.2464 | 0.3088 |
| <i>Carpesium lipskyi</i>                                | 0.2656 | 0.3694 | 0.424  |
| <i>Carum buriaticum</i>                                 | 0.4203 | 0.4497 | 0.46   |
| <i>Carum carvi</i>                                      | 0.3898 | 0.5139 | 0.5992 |
| <i>Caryopteris mongholica</i>                           | 0.4711 | 0.4737 | 0.4745 |

|                                                  |        |        |        |
|--------------------------------------------------|--------|--------|--------|
| <i>Caryopteris tangutica</i>                     | 0.3467 | 0.5049 | 0.6219 |
| <i>Caryopteris trichosphaera</i>                 | 0.1795 | 0.178  | 0.1901 |
| <i>Catabrosa aquatica</i>                        | 0.5415 | 0.7093 | 0.8183 |
| <i>Catabrosa aquatica</i> var. <i>angusta</i>    | 0.5525 | 0.6887 | 0.7767 |
| <i>Cerastium arvense</i>                         | 0.2735 | 0.2929 | 0.2979 |
| <i>Cerastium fontanum</i>                        | 0.5264 | 0.5515 | 0.5666 |
| <i>Cerastium fontanum</i> subsp. <i>vulgare</i>  | 0.5039 | 0.527  | 0.5428 |
| <i>Cerastium pusillum</i>                        | 0.3098 | 0.5558 | 0.7602 |
| <i>Cerasus stipulacea</i>                        | 0.4251 | 0.452  | 0.4044 |
| <i>Cerasus tomentosa</i>                         | 0.5658 | 0.5739 | 0.5806 |
| <i>Chamaerhodos erecta</i>                       | 0.1992 | 0.2833 | 0.3218 |
| <i>Chamaesium paradoxum</i>                      | 0.4308 | 0.4641 | 0.457  |
| <i>Chamaesium thalictrifolium</i>                | 0.1384 | 0.2981 | 0.4465 |
| <i>Chamerion angustifolium</i>                   | 0.322  | 0.3225 | 0.3237 |
| <i>Chenopodium album</i>                         | 0.3221 | 0.3833 | 0.3726 |
| <i>Chenopodium glaucum</i>                       | 0.1203 | 0.3118 | 0.5391 |
| <i>Chenopodium hybridum</i>                      | 0.5655 | 0.5941 | 0.6112 |
| <i>Chenopodium iljinii</i>                       | 0.2361 | 0.3878 | 0.4438 |
| <i>Chenopodium karoii</i>                        | 0.1212 | 0.2652 | 0.3986 |
| <i>Chloris virgata</i>                           | 0.2663 | 0.3155 | 0.3223 |
| <i>Chrysanthemum chanetii</i>                    | 0.5341 | 0.5389 | 0.5419 |
| <i>Cicerbita roborowskii</i>                     | 0.0762 | 0.0595 | 0.0507 |
| <i>Cimicifuga foetida</i>                        | 0.2091 | 0.314  | 0.295  |
| <i>Circaea alpina</i>                            | 0.403  | 0.6503 | 0.7706 |
| <i>Circaeaster agrestis</i>                      | 0.3164 | 0.502  | 0.5564 |
| <i>Cirsium arvense</i> var. <i>alpestre</i>      | 0.3349 | 0.4819 | 0.5935 |
| <i>Cirsium arvense</i> var. <i>integrifolium</i> | 0.2687 | 0.3581 | 0.4315 |
| <i>Cirsium souliei</i>                           | 0.5008 | 0.5966 | 0.6269 |
| <i>Clematis aethusifolia</i>                     | 0.4438 | 0.5969 | 0.7025 |
| <i>Clematis akebioides</i>                       | 0.18   | 0.1962 | 0.2013 |
| <i>Clematis brevicaudata</i>                     | 0.032  | 0.0471 | 0.0656 |
| <i>Clematis glauca</i>                           | 0.3131 | 0.3663 | 0.3865 |
| <i>Clematis intricata</i>                        | 0.3233 | 0.4579 | 0.4032 |
| <i>Clematis macropetala</i>                      | 0.4437 | 0.5606 | 0.5288 |
| <i>Clematis nannophylla</i>                      | 0.1383 | 0.1507 | 0.1681 |
| <i>Clematis rehderiana</i>                       | 0.1336 | 0.1998 | 0.2544 |
| <i>Clematis tangutica</i>                        | 0.2372 | 0.3628 | 0.5076 |
| <i>Codonopsis canescens</i>                      | 0.2046 | 0.4224 | 0.698  |
| <i>Codonopsis viridiflora</i>                    | 0.1182 | 0.135  | 0.2452 |
| <i>Coluria longifolia</i>                        | 0.5203 | 0.5455 | 0.5576 |
| <i>Comarum salesovianum</i>                      | 0.1218 | 0.131  | 0.1374 |
| <i>Comastoma cyananthiflorum</i>                 | 0.0873 | 0.253  | 0.4156 |
| <i>Comastoma falcatum</i>                        | 0.0027 | 0.0023 | 0.0109 |
| <i>Comastoma pedunculatum</i>                    | 0.4268 | 0.5711 | 0.6783 |
| <i>Comastoma polycladum</i>                      | 0.6026 | 0.6784 | 0.7332 |
| <i>Comastoma pulmonarium</i>                     | 0.3907 | 0.5953 | 0.7357 |
| <i>Convolvulus ammannii</i>                      | 0.1458 | 0.1626 | 0.1683 |
| <i>Convolvulus arvensis</i>                      | 0.2978 | 0.4325 | 0.5508 |
| <i>Corethroedendron multijugum</i>               | 0.0414 | 0.0431 | 0.0674 |
| <i>Corispermum tibeticum</i>                     | 0.313  | 0.5759 | 0.798  |
| <i>Corydalis adunca</i>                          | 0.3404 | 0.3741 | 0.3944 |
| <i>Corydalis conspersa</i>                       | 0.5844 | 0.6032 | 0.6145 |
| <i>Corydalis curviflora</i>                      | 0.4031 | 0.4714 | 0.5224 |
| <i>Corydalis dasyptera</i>                       | 0.4043 | 0.5325 | 0.6199 |
| <i>Corydalis impatiens</i>                       | 0.1203 | 0.133  | 0.1376 |
| <i>Corydalis linarioides</i>                     | 0.3208 | 0.3373 | 0.374  |
| <i>Corydalis livida</i>                          | 0.1426 | 0.3408 | 0.5472 |
| <i>Corydalis melanochlora</i>                    | 0.4053 | 0.4343 | 0.4553 |
| <i>Corydalis mucronifera</i>                     | 0.4476 | 0.4598 | 0.4131 |
| <i>Corydalis pseudoimpatiens</i>                 | 0.3822 | 0.5383 | 0.6686 |
| <i>Corydalis scaberula</i>                       | 0.3081 | 0.3375 | 0.3563 |
| <i>Corydalis straminea</i>                       | 0.197  | 0.2024 | 0.2709 |
| <i>Corydalis stricta</i>                         | 0.4609 | 0.4957 | 0.5164 |
| <i>Corydalis trachycarpa</i>                     | 0.2184 | 0.3283 | 0.4163 |
| <i>Corydalis zadoiensis</i>                      | 0.3976 | 0.4027 | 0.3835 |
| <i>Cosmos bipinnatus</i>                         | 0.2516 | 0.2841 | 0.3191 |



|                                                       |        |        |        |
|-------------------------------------------------------|--------|--------|--------|
| <i>Cotoneaster acuminatus</i>                         | 0.1147 | 0.127  | 0.1331 |
| <i>Cotoneaster acutifolius</i>                        | 0.1943 | 0.1605 | 0.1701 |
| <i>Cotoneaster adpressus</i>                          | 0.4912 | 0.5213 | 0.5141 |
| <i>Cotoneaster divaricatus</i>                        | 0.3035 | 0.4359 | 0.5351 |
| <i>Cotoneaster gracilis</i>                           | 0.404  | 0.5279 | 0.6127 |
| <i>Cotoneaster multiflorus</i>                        | 0.1575 | 0.1844 | 0.2017 |
| <i>Cotoneaster submultiflorus</i>                     | 0.5708 | 0.5706 | 0.5926 |
| <i>Cotoneaster zabelii</i>                            | 0.4157 | 0.468  | 0.4309 |
| <i>Crataegus kansuensis</i>                           | 0.4705 | 0.5089 | 0.5153 |
| <i>Cremanthodium brunneopilosum</i>                   | 0.1388 | 0.287  | 0.4446 |
| <i>Cremanthodium discoideum</i>                       | 0.2742 | 0.2931 | 0.2827 |
| <i>Cremanthodium ellisii</i>                          | 0.2741 | 0.4675 | 0.6109 |
| <i>Cremanthodium humile</i>                           | 0.2325 | 0.2985 | 0.3043 |
| <i>Cremanthodium lineare</i>                          | 0.3526 | 0.3847 | 0.4178 |
| <i>Cryptogramma stelleri</i>                          | 0.3603 | 0.3693 | 0.459  |
| <i>Cuscuta europaea</i>                               | 0.1959 | 0.2099 | 0.3114 |
| <i>Cyananthus hookeri</i>                             | 0.3309 | 0.4169 | 0.484  |
| <i>Cymbaria mongolica</i>                             | 0.1717 | 0.2461 | 0.3019 |
| <i>Cynanchum chinense</i>                             | 0.2368 | 0.4269 | 0.615  |
| <i>Cynanchum thesioides</i>                           | 0.1148 | 0.1342 | 0.1466 |
| <i>Cynoglossum gansuense</i>                          | 0.2021 | 0.2314 | 0.2564 |
| <i>Cynoglossum wallichii</i> var. <i>glochidiatum</i> | 0.5111 | 0.5691 | 0.6222 |
| <i>Cynomorium songaricum</i>                          | 0.6203 | 0.6248 | 0.6269 |
| <i>Cystopteris fragilis</i>                           | 0.3925 | 0.5004 | 0.6638 |
| <i>Cystopteris montana</i>                            | 0.5731 | 0.6181 | 0.6506 |
| <i>Dactylorhiza hatagirena</i>                        | 0.3065 | 0.3764 | 0.4338 |
| <i>Dactylorhiza viridis</i>                           | 0.0486 | 0.0575 | 0.063  |
| <i>Daphne retusa</i>                                  | 0.1187 | 0.1789 | 0.3373 |
| <i>Daphne tangutica</i>                               | 0.317  | 0.3576 | 0.3113 |
| <i>Datura stramonium</i>                              | 0.4417 | 0.5778 | 0.6849 |
| <i>Delphinium albocoeruleum</i>                       | 0.4589 | 0.4729 | 0.4532 |
| <i>Delphinium caeruleum</i>                           | 0.29   | 0.4737 | 0.6661 |
| <i>Delphinium candelabrum</i>                         | 0.2696 | 0.3558 | 0.3585 |
| <i>Delphinium candelabrum</i> var. <i>monanthum</i>   | 0.3954 | 0.4509 | 0.4866 |
| <i>Delphinium grandiflorum</i>                        | 0.5263 | 0.6543 | 0.7496 |
| <i>Delphinium kamaonense</i>                          | 0.5573 | 0.5589 | 0.5705 |
| <i>Delphinium kamaonense</i> var. <i>glabrescens</i>  | 0.3222 | 0.4064 | 0.5361 |
| <i>Delphinium nangchienense</i>                       | 0.1788 | 0.3841 | 0.5254 |
| <i>Delphinium pylzowii</i>                            | 0.0793 | 0.1825 | 0.2883 |
| <i>Delphinium pylzowii</i> var. <i>trigynum</i>       | 0.313  | 0.5402 | 0.7151 |
| <i>Delphinium sparsiflorum</i>                        | 0.6253 | 0.634  | 0.6395 |
| <i>Delphinium tangkulaense</i>                        | 0.3996 | 0.535  | 0.6182 |
| <i>Delphinium trichophorum</i>                        | 0.6183 | 0.6239 | 0.6337 |
| <i>Deschampsia cespitosa</i>                          | 0.1522 | 0.1654 | 0.17   |
| <i>Deschampsia littoralis</i>                         | 0.1539 | 0.4099 | 0.6467 |
| <i>Descurainia sophia</i>                             | 0.4856 | 0.5122 | 0.5137 |
| <i>Deyeuxia flavens</i>                               | 0.2509 | 0.3061 | 0.4495 |
| <i>Deyeuxia kokonorica</i>                            | 0.4945 | 0.6912 | 0.8417 |
| <i>Deyeuxia pyramidalis</i>                           | 0.1946 | 0.3548 | 0.4512 |
| <i>Deyeuxia scabrescens</i>                           | 0.3413 | 0.3796 | 0.4108 |
| <i>Deyeuxia tibetica</i> var. <i>przewalskyi</i>      | 0.5109 | 0.5739 | 0.6337 |
| <i>Dianthus superbus</i>                              | 0.4707 | 0.4931 | 0.5328 |
| <i>Dicranostigma leptopodum</i>                       | 0.199  | 0.2068 | 0.2095 |
| <i>Dilophia ebracteata</i>                            | 0.4991 | 0.5659 | 0.6079 |
| <i>Dilophia salsa</i>                                 | 0.1562 | 0.1732 | 0.1831 |
| <i>Dipsacus japonicus</i>                             | 0.3568 | 0.4911 | 0.5854 |
| <i>Dontostemon glandulosus</i>                        | 0.242  | 0.3362 | 0.4207 |
| <i>Dontostemon tibeticus</i>                          | 0.0626 | 0.0616 | 0.0588 |
| <i>Doronicum stenoglossum</i>                         | 0.4906 | 0.567  | 0.5686 |
| <i>Draba altaica</i>                                  | 0.199  | 0.2263 | 0.243  |
| <i>Draba eriopoda</i>                                 | 0.2252 | 0.3746 | 0.4927 |
| <i>Draba ladyginii</i>                                | 0.1618 | 0.2368 | 0.3004 |
| <i>Draba lanceolata</i>                               | 0.3386 | 0.4659 | 0.5134 |
| <i>Draba mongolica</i>                                | 0.2413 | 0.2597 | 0.2709 |
| <i>Draba nemorosa</i>                                 | 0.1535 | 0.2382 | 0.2353 |
| <i>Draba oreades</i>                                  | 0.451  | 0.6368 | 0.7632 |

|                                                       |        |        |        |
|-------------------------------------------------------|--------|--------|--------|
| <i>Dracocephalum argunense</i>                        | 0.2307 | 0.4363 | 0.5942 |
| <i>Dracocephalum heterophyllum</i>                    | 0.0799 | 0.1067 | 0.1323 |
| <i>Dracocephalum rupestre</i>                         | 0.0245 | 0.022  | 0.0279 |
| <i>Dracocephalum tanguticum</i>                       | 0.3534 | 0.5206 | 0.651  |
| <i>Drynaria baronii</i>                               | 0.5705 | 0.5709 | 0.6165 |
| <i>Dryopteris barbigera</i>                           | 0.4568 | 0.5568 | 0.6227 |
| <i>Dryopteris komarovii</i>                           | 0.5882 | 0.6054 | 0.6198 |
| <i>Dysphania aristata</i>                             | 0.2915 | 0.4224 | 0.5493 |
| <i>Dysphania schraderiana</i>                         | 0.1519 | 0.1589 | 0.1969 |
| <i>Echinops gmelinii</i>                              | 0.5078 | 0.5043 | 0.4997 |
| <i>Elaeagnus angustifolia</i>                         | 0.6024 | 0.6467 | 0.6999 |
| <i>Eleocharis abnorma</i>                             | 0.1985 | 0.3848 | 0.6242 |
| <i>Eleutherococcus giraldii</i>                       | 0.4122 | 0.4526 | 0.4736 |
| <i>Eleutherococcus wilsonii</i> var. <i>pilosulus</i> | 0.3117 | 0.5796 | 0.7787 |
| <i>Elsholtzia densa</i>                               | 0.542  | 0.5734 | 0.5526 |
| <i>Elsholtzia feddei</i>                              | 0.4659 | 0.5417 | 0.5911 |
| <i>Elsholtzia fruticosa</i>                           | 0.5687 | 0.6151 | 0.6462 |
| <i>Elymus abolinii</i>                                | 0.139  | 0.2729 | 0.2683 |
| <i>Elymus antiquus</i>                                | 0.1191 | 0.1337 | 0.1423 |
| <i>Elymus aristiglumis</i>                            | 0.4997 | 0.5592 | 0.5961 |
| <i>Elymus atratus</i>                                 | 0.3166 | 0.5023 | 0.6187 |
| <i>Elymus breviaristatus</i>                          | 0.3323 | 0.4196 | 0.3746 |
| <i>Elymus brevipes</i>                                | 0.2942 | 0.4114 | 0.5106 |
| <i>Elymus burchan-buddae</i>                          | 0.2872 | 0.3677 | 0.4225 |
| <i>Elymus dahuricus</i>                               | 0.1719 | 0.3235 | 0.4816 |
| <i>Elymus dahuricus</i> var. <i>cyllindricus</i>      | 0.441  | 0.4386 | 0.4406 |
| <i>Elymus dolichatherus</i>                           | 0.2105 | 0.2048 | 0.2218 |
| <i>Elymus nutans</i>                                  | 0.3354 | 0.3803 | 0.4133 |
| <i>Elymus purpurascens</i>                            | 0.5563 | 0.5693 | 0.5771 |
| <i>Elymus sibiricus</i>                               | 0.3505 | 0.3712 | 0.3849 |
| <i>Elymus sinicus</i>                                 | 0.4041 | 0.631  | 0.7992 |
| <i>Elymus strictus</i>                                | 0.2347 | 0.3179 | 0.3829 |
| <i>Elymus tangutorum</i>                              | 0.3699 | 0.4363 | 0.4801 |
| <i>Elymus trichospiculus</i>                          | 0.3787 | 0.4332 | 0.4701 |
| <i>Ephedra equisetina</i>                             | 0.427  | 0.5344 | 0.6102 |
| <i>Ephedra intermedia</i>                             | 0.1859 | 0.2067 | 0.2245 |
| <i>Ephedra monosperma</i>                             | 0.4722 | 0.507  | 0.5294 |
| <i>Ephedra przewalskii</i>                            | 0.2621 | 0.3528 | 0.4263 |
| <i>Epilobium palustre</i>                             | 0.5915 | 0.6122 | 0.627  |
| <i>Epipactis helleborine</i>                          | 0.0777 | 0.1104 | 0.1691 |
| <i>Equisetum arvense</i>                              | 0.2491 | 0.3753 | 0.4661 |
| <i>Equisetum palustre</i>                             | 0.5148 | 0.5432 | 0.561  |
| <i>Equisetum ramosissimum</i>                         | 0.6321 | 0.6321 | 0.6321 |
| <i>Erigeron acris</i>                                 | 0.3884 | 0.5377 | 0.4826 |
| <i>Erigeron patentisquama</i>                         | 0.5583 | 0.6119 | 0.6518 |
| <i>Eriophyton wallichii</i>                           | 0.49   | 0.5299 | 0.5536 |
| <i>Eritrichium medicarpum</i>                         | 0.3124 | 0.3766 | 0.3762 |
| <i>Erodium stephanianum</i>                           | 0.4461 | 0.5418 | 0.4912 |
| <i>Eruca vesicaria</i> subsp. <i>sativa</i>           | 0.3412 | 0.3747 | 0.3927 |
| <i>Erysimum funiculosum</i>                           | 0.5514 | 0.5745 | 0.6099 |
| <i>Erysimum roseum</i>                                | 0.2187 | 0.2713 | 0.2916 |
| <i>Euonymus giraldii</i>                              | 0.0703 | 0.0797 | 0.0855 |
| <i>Euonymus semenovii</i>                             | 0.2212 | 0.4149 | 0.5933 |
| <i>Euphorbia alata</i>                                | 0.5148 | 0.5643 | 0.595  |
| <i>Euphorbia altotibetica</i>                         | 0.1878 | 0.1905 | 0.1934 |
| <i>Euphorbia helioscopia</i>                          | 0.2351 | 0.5156 | 0.7458 |
| <i>Euphorbia kansuensis</i>                           | 0.6306 | 0.6306 | 0.6315 |
| <i>Euphorbia micractina</i>                           | 0.2466 | 0.3632 | 0.4677 |
| <i>Euphorbia stracheyi</i>                            | 0.5404 | 0.6576 | 0.7539 |
| <i>Euphrasia pectinata</i>                            | 0.2145 | 0.2783 | 0.3869 |
| <i>Euphrasia regelii</i>                              | 0.4368 | 0.5769 | 0.6693 |
| <i>Eutrema heterophyllum</i>                          | 0.2827 | 0.3124 | 0.303  |
| <i>Fagopyrum esculentum</i>                           | 0.6296 | 0.6297 | 0.6298 |
| <i>Fagopyrum tataricum</i>                            | 0.4333 | 0.4836 | 0.5831 |
| <i>Fallopia aubertii</i>                              | 0.613  | 0.6131 | 0.6116 |
| <i>Fallopia convolvulus</i>                           | 0.2838 | 0.4291 | 0.5973 |

|                                              |        |        |        |
|----------------------------------------------|--------|--------|--------|
| <i>Festuca alaica</i>                        | 0.3406 | 0.4058 | 0.3727 |
| <i>Festuca coelestis</i>                     | 0.0896 | 0.1278 | 0.1579 |
| <i>Festuca forrestii</i>                     | 0.1038 | 0.1186 | 0.1264 |
| <i>Festuca nitidula</i>                      | 0.3382 | 0.3804 | 0.3524 |
| <i>Festuca ovina</i>                         | 0.4192 | 0.5861 | 0.6948 |
| <i>Festuca rubra</i>                         | 0.4732 | 0.488  | 0.5189 |
| <i>Festuca rubra subsp. arctica</i>          | 0.2886 | 0.4733 | 0.6177 |
| <i>Festuca sinensis</i>                      | 0.5843 | 0.5832 | 0.6115 |
| <i>Festuca valesiaca</i>                     | 0.381  | 0.4874 | 0.5917 |
| <i>Fragaria gracilis</i>                     | 0.1369 | 0.2067 | 0.2697 |
| <i>Fragaria orientalis</i>                   | 0.1493 | 0.2051 | 0.249  |
| <i>Fritillaria cirrhosa</i>                  | 0.312  | 0.3824 | 0.3528 |
| <i>Fritillaria przewalskii</i>               | 0.2677 | 0.4327 | 0.4843 |
| <i>Fritillaria unibracteata</i>              | 0.4686 | 0.6546 | 0.7883 |
| <i>Gagea pauciflora</i>                      | 0.6321 | 0.6321 | 0.6321 |
| <i>Galeopsis bifida</i>                      | 0.0955 | 0.1556 | 0.2284 |
| <i>Galium aparine</i>                        | 0.379  | 0.5302 | 0.6281 |
| <i>Galium boreale</i>                        | 0.509  | 0.5296 | 0.5579 |
| <i>Galium boreale var. ciliatum</i>          | 0.3414 | 0.3727 | 0.3994 |
| <i>Galium spurium</i>                        | 0.5524 | 0.5789 | 0.5413 |
| <i>Galium verum</i>                          | 0.2735 | 0.5198 | 0.7139 |
| <i>Galium verum var. trachycarpum</i>        | 0.508  | 0.6053 | 0.6689 |
| <i>Gentiana abaisensis</i>                   | 0.419  | 0.6444 | 0.7908 |
| <i>Gentiana algida</i>                       | 0.2851 | 0.4789 | 0.6491 |
| <i>Gentiana aperta</i>                       | 0.5244 | 0.5817 | 0.5734 |
| <i>Gentiana aristata</i>                     | 0.2718 | 0.3037 | 0.324  |
| <i>Gentiana dahurica</i>                     | 0.543  | 0.543  | 0.5796 |
| <i>Gentiana lawrencei</i>                    | 0.3566 | 0.6176 | 0.8041 |
| <i>Gentiana leucomelaena</i>                 | 0.4809 | 0.5816 | 0.6545 |
| <i>Gentiana lhassica</i>                     | 0.3805 | 0.6432 | 0.8247 |
| <i>Gentiana macrophylla</i>                  | 0.2118 | 0.2385 | 0.2518 |
| <i>Gentiana nubigena</i>                     | 0.2508 | 0.2705 | 0.2699 |
| <i>Gentiana pseudoaquatica</i>               | 0.3149 | 0.4674 | 0.4525 |
| <i>Gentiana pudica</i>                       | 0.5074 | 0.5403 | 0.5601 |
| <i>Gentiana purdomii</i>                     | 0.4486 | 0.4736 | 0.4883 |
| <i>Gentiana sinoornata</i>                   | 0.2659 | 0.28   | 0.2869 |
| <i>Gentiana siphonantha</i>                  | 0.2272 | 0.3889 | 0.4739 |
| <i>Gentiana squarrosa</i>                    | 0.3078 | 0.4633 | 0.577  |
| <i>Gentiana stipitata</i>                    | 0.4257 | 0.4716 | 0.5407 |
| <i>Gentiana straminea</i>                    | 0.2782 | 0.4374 | 0.56   |
| <i>Gentiana striata</i>                      | 0.4308 | 0.4315 | 0.424  |
| <i>Gentiana szechenyii</i>                   | 0.4313 | 0.5124 | 0.5483 |
| <i>Gentiana vandelliioides</i>               | 0.5394 | 0.5677 | 0.5866 |
| <i>Gentiana veitchiorum</i>                  | 0.0565 | 0.0846 | 0.1224 |
| <i>Gentianella azurea</i>                    | 0.594  | 0.594  | 0.5941 |
| <i>Gentianella pygmaea</i>                   | 0.6282 | 0.633  | 0.6359 |
| <i>Gentianopsis barbata</i>                  | 0.3718 | 0.5287 | 0.65   |
| <i>Gentianopsis barbata var. stenocalyx</i>  | 0.1616 | 0.18   | 0.1902 |
| <i>Gentianopsis paludosa</i>                 | 0.0941 | 0.1031 | 0.1125 |
| <i>Geranium albiflorum</i>                   | 0.316  | 0.2613 | 0.2203 |
| <i>Geranium platyanthum</i>                  | 0.3233 | 0.3706 | 0.4047 |
| <i>Geranium pratense</i>                     | 0.5201 | 0.5695 | 0.6039 |
| <i>Geranium pylzowianum</i>                  | 0.36   | 0.5907 | 0.805  |
| <i>Geranium sibiricum</i>                    | 0.2416 | 0.4058 | 0.5292 |
| <i>Geum aleppicum</i>                        | 0.1419 | 0.3596 | 0.6497 |
| <i>Glaux maritima</i>                        | 0.2857 | 0.3033 | 0.3138 |
| <i>Glycyrrhiza uralensis</i>                 | 0.5319 | 0.5811 | 0.59   |
| <i>Goldbachia laevigata</i>                  | 0.4508 | 0.4912 | 0.5155 |
| <i>Halenia elliptica</i>                     | 0.2693 | 0.2882 | 0.3043 |
| <i>Halerpestes sarmentosa</i>                | 0.084  | 0.0718 | 0.056  |
| <i>Halerpestes tricuspis</i>                 | 0.2792 | 0.4746 | 0.6385 |
| <i>Halerpestes tricuspis var. intermedia</i> | 0.3164 | 0.4959 | 0.6852 |
| <i>Halogeton arachnoideus</i>                | 0.3269 | 0.385  | 0.4106 |
| <i>Halogeton glomeratus</i>                  | 0.4003 | 0.4003 | 0.4003 |
| <i>Haloxylon ammodendron</i>                 | 0.415  | 0.4224 | 0.4031 |
| <i>Hedysarum algidum</i>                     | 0.502  | 0.5077 | 0.5143 |

|                                               |        |        |        |
|-----------------------------------------------|--------|--------|--------|
| <i>Hedysarum sikkimense</i>                   | 0.2462 | 0.3714 | 0.4826 |
| <i>Hedysarum tanguticum</i>                   | 0.572  | 0.6427 | 0.6426 |
| <i>Helictotrichon hookeri</i>                 | 0.0605 | 0.0676 | 0.0706 |
| <i>Helictotrichon tibeticum</i>               | 0.2331 | 0.3795 | 0.512  |
| <i>Heracleum candicans</i>                    | 0.1244 | 0.3306 | 0.5286 |
| <i>Heracleum millefolium</i>                  | 0.6089 | 0.6166 | 0.6342 |
| <i>Herminium alaschanicum</i>                 | 0.6076 | 0.6063 | 0.6392 |
| <i>Herminium monorchis</i>                    | 0.0174 | 0.0288 | 0.0383 |
| <i>Hippolytia desmantha</i>                   | 0.1254 | 0.1447 | 0.1555 |
| <i>Hippophae neurocarpa</i>                   | 0.2944 | 0.3014 | 0.3068 |
| <i>Hippophae rhamnoides</i>                   | 0.3853 | 0.5903 | 0.7416 |
| <i>Hippophae rhamnoides subsp. sinensis</i>   | 0.1799 | 0.1993 | 0.2103 |
| <i>Hippophae tibetana</i>                     | 0.3853 | 0.5152 | 0.6039 |
| <i>Hippuris vulgaris</i>                      | 0.3323 | 0.5319 | 0.6791 |
| <i>Hordeum bogdanii</i>                       | 0.4878 | 0.516  | 0.5333 |
| <i>Hordeum brevisubulatum</i>                 | 0.5346 | 0.5673 | 0.5869 |
| <i>Hordeum roshevitzii</i>                    | 0.5343 | 0.5726 | 0.596  |
| <i>Hydrangea bretschneideri</i>               | 0.0704 | 0.075  | 0.0791 |
| <i>Hyoscyamus niger</i>                       | 0.4815 | 0.5573 | 0.5625 |
| <i>Hypecoum leptocarpum</i>                   | 0.5255 | 0.5501 | 0.5933 |
| <i>Hypericum przewalskii</i>                  | 0.1247 | 0.1416 | 0.1508 |
| <i>Incarvillea berezovskii</i>                | 0.0464 | 0.0605 | 0.1435 |
| <i>Incarvillea compacta</i>                   | 0.3652 | 0.3905 | 0.4063 |
| <i>Incarvillea sinensis var. przewalskii</i>  | 0.3402 | 0.5684 | 0.7424 |
| <i>Inula japonica</i>                         | 0.3419 | 0.3496 | 0.3525 |
| <i>Inula salsoloides</i>                      | 0.229  | 0.3493 | 0.461  |
| <i>Iris lactea</i>                            | 0.3035 | 0.4361 | 0.4627 |
| <i>Iris potaninii</i>                         | 0.55   | 0.6655 | 0.7504 |
| <i>Iris songarica</i>                         | 0.5606 | 0.5606 | 0.5614 |
| <i>Isolepis setacea</i>                       | 0.2265 | 0.2506 | 0.3432 |
| <i>Isopyrum anemonoides</i>                   | 0.3661 | 0.4593 | 0.5234 |
| <i>Ixeris chinensis</i>                       | 0.2708 | 0.2938 | 0.3478 |
| <i>Ixeris chinensis subsp. versicolor</i>     | 0.0368 | 0.1239 | 0.2498 |
| <i>Juncus allioides</i>                       | 0.453  | 0.4816 | 0.5204 |
| <i>Juncus bufonius</i>                        | 0.3949 | 0.4393 | 0.4747 |
| <i>Juncus castaneus</i>                       | 0.4054 | 0.4883 | 0.5578 |
| <i>Juncus thomsonii</i>                       | 0.226  | 0.2618 | 0.2882 |
| <i>Juniperus chinensis</i>                    | 0.5277 | 0.5672 | 0.5985 |
| <i>Juniperus formosana</i>                    | 0.0643 | 0.0844 | 0.1364 |
| <i>Juniperus przewalskii</i>                  | 0.5247 | 0.5841 | 0.6416 |
| <i>Juniperus tibetica</i>                     | 0.3551 | 0.3789 | 0.3885 |
| <i>Kalidium cuspidatum</i>                    | 0.6288 | 0.6469 | 0.6602 |
| <i>Kalidium cuspidatum var. sinicum</i>       | 0.6199 | 0.622  | 0.6406 |
| <i>Kalidium foliatum</i>                      | 0.289  | 0.4719 | 0.6742 |
| <i>Kalidium gracile</i>                       | 0.097  | 0.1084 | 0.1136 |
| <i>Kengyilia grandiglumis</i>                 | 0.3071 | 0.4354 | 0.5427 |
| <i>Kengyilia hirsuta</i>                      | 0.1151 | 0.1267 | 0.1303 |
| <i>Kengyilia melanthera</i>                   | 0.4259 | 0.4599 | 0.5078 |
| <i>Kengyilia mutica</i>                       | 0.4553 | 0.4403 | 0.4026 |
| <i>Kengyilia stenachyra</i>                   | 0.3344 | 0.5034 | 0.6252 |
| <i>Kengyilia thoroldiana</i>                  | 0.4537 | 0.4525 | 0.4697 |
| <i>Klasea centauroides subsp. strangulata</i> | 0.3141 | 0.59   | 0.7914 |
| <i>Kobresia capillifolia</i>                  | 0.1511 | 0.1452 | 0.0977 |
| <i>Kobresia esenbeckii</i>                    | 0.2363 | 0.2661 | 0.2852 |
| <i>Kobresia filifolia</i>                     | 0.6175 | 0.6227 | 0.6334 |
| <i>Kobresia humilis</i>                       | 0.323  | 0.4362 | 0.4953 |
| <i>Kobresia kansuensis</i>                    | 0.4038 | 0.4106 | 0.4198 |
| <i>Kobresia macrantha</i>                     | 0.3597 | 0.5146 | 0.6253 |
| <i>Kobresia myosuroides</i>                   | 0.3783 | 0.4041 | 0.416  |
| <i>Kobresia pusilla</i>                       | 0.4241 | 0.6134 | 0.7544 |
| <i>Kobresia pygmaea</i>                       | 0.3542 | 0.4761 | 0.4406 |
| <i>Kobresia robusta</i>                       | 0.3443 | 0.3657 | 0.361  |
| <i>Kobresia royleana</i>                      | 0.5204 | 0.5941 | 0.6368 |
| <i>Kobresia schoenoides</i>                   | 0.1166 | 0.1336 | 0.1431 |
| <i>Kobresia vidua</i>                         | 0.241  | 0.3883 | 0.5939 |
| <i>Kochia scoparia</i>                        | 0.0449 | 0.0481 | 0.0489 |

|                                                  |        |        |        |
|--------------------------------------------------|--------|--------|--------|
| <i>Kochia scoparia</i> var. <i>sieversiana</i>   | 0.3462 | 0.4225 | 0.5405 |
| <i>Koeleria asiatica</i>                         | 0.0731 | 0.0796 | 0.0843 |
| <i>Koeleria cristata</i> var. <i>poaeformis</i>  | 0.0508 | 0.0543 | 0.0553 |
| <i>Koeleria litvinowii</i>                       | 0.2222 | 0.4305 | 0.5183 |
| <i>Koeleria macrantha</i>                        | 0.1646 | 0.3668 | 0.5778 |
| <i>Koenigia islandica</i>                        | 0.2074 | 0.4061 | 0.4829 |
| <i>Krascheninnikovia ceratoides</i>              | 0.5323 | 0.5596 | 0.5766 |
| <i>Lactuca tatarica</i>                          | 0.3789 | 0.4675 | 0.5324 |
| <i>Lagopsis supina</i>                           | 0.2138 | 0.405  | 0.5726 |
| <i>Lagotis brachystachya</i>                     | 0.0117 | 0.015  | 0.0206 |
| <i>Lagotis brevituba</i>                         | 0.1427 | 0.1626 | 0.1732 |
| <i>Lamiophlomis rotata</i>                       | 0.1421 | 0.2327 | 0.3534 |
| <i>Lamium amplexicaule</i>                       | 0.2173 | 0.2462 | 0.2547 |
| <i>Lancea tibetica</i>                           | 0.5506 | 0.5783 | 0.5949 |
| <i>Lappula consanguinea</i>                      | 0.2307 | 0.4151 | 0.5725 |
| <i>Lappula redowskii</i>                         | 0.3182 | 0.4365 | 0.5506 |
| <i>Lathyrus quinquenervius</i>                   | 0.5393 | 0.6879 | 0.8184 |
| <i>Leibnitzia anandria</i>                       | 0.531  | 0.5794 | 0.6202 |
| <i>Leontopodium calocephalum</i>                 | 0.2583 | 0.3131 | 0.3414 |
| <i>Leontopodium dedekensii</i>                   | 0.2742 | 0.344  | 0.3977 |
| <i>Leontopodium haplophylloides</i>              | 0.5674 | 0.6295 | 0.6712 |
| <i>Leontopodium junpeianum</i>                   | 0.3074 | 0.5492 | 0.7254 |
| <i>Leontopodium leontopodioides</i>              | 0.2001 | 0.2711 | 0.3031 |
| <i>Leontopodium nanum</i>                        | 0.4102 | 0.4387 | 0.4118 |
| <i>Leontopodium ochroleucum</i>                  | 0.089  | 0.0966 | 0.0999 |
| <i>Leontopodium pusillum</i>                     | 0.3117 | 0.4907 | 0.6063 |
| <i>Leontopodium souliei</i>                      | 0.2953 | 0.5197 | 0.6931 |
| <i>Lepidium apetalum</i>                         | 0.61   | 0.6096 | 0.6273 |
| <i>Lepidium capitatum</i>                        | 0.2487 | 0.3107 | 0.3971 |
| <i>Lepidium cordatum</i>                         | 0.0634 | 0.1194 | 0.3243 |
| <i>Lepidium latifolium</i>                       | 0.063  | 0.0688 | 0.0716 |
| <i>Lepidium obtusum</i>                          | 0.1729 | 0.1905 | 0.2003 |
| <i>Lepisorus clathratus</i>                      | 0.2229 | 0.2495 | 0.2657 |
| <i>Lepyrodiclis holosteoides</i>                 | 0.2503 | 0.3735 | 0.4253 |
| <i>Lespedeza davurica</i>                        | 0.5715 | 0.5982 | 0.6142 |
| <i>Lespedeza potaninii</i>                       | 0.6118 | 0.6269 | 0.6361 |
| <i>Leymus angustus</i>                           | 0.1718 | 0.1822 | 0.1771 |
| <i>Leymus secalinus</i>                          | 0.6215 | 0.6215 | 0.6215 |
| <i>Libanotis depressa</i>                        | 0.5863 | 0.5977 | 0.6106 |
| <i>Ligularia liatroides</i>                      | 0.5349 | 0.5543 | 0.5703 |
| <i>Ligularia przewalskii</i>                     | 0.596  | 0.6309 | 0.5967 |
| <i>Ligularia sagitta</i>                         | 0.5284 | 0.6492 | 0.7394 |
| <i>Ligularia tangutorum</i>                      | 0.5211 | 0.6007 | 0.6584 |
| <i>Ligularia virgaurea</i>                       | 0.0347 | 0.0814 | 0.1451 |
| <i>Ligusticum moniliforme</i>                    | 0.5507 | 0.5873 | 0.6097 |
| <i>Ligusticum thomsonii</i>                      | 0.6183 | 0.6232 | 0.6367 |
| <i>Lilium pumilum</i>                            | 0.1756 | 0.2365 | 0.2851 |
| <i>Limonium aureum</i>                           | 0.3521 | 0.416  | 0.4663 |
| <i>Linum perenne</i>                             | 0.3355 | 0.3765 | 0.403  |
| <i>Littledalea przewalskyi</i>                   | 0.2796 | 0.4981 | 0.6551 |
| <i>Littledalea racemosa</i>                      | 0.3094 | 0.4746 | 0.5955 |
| <i>Lloydia serotina</i>                          | 0.4474 | 0.5008 | 0.5376 |
| <i>Lomatogonium bellum</i>                       | 0.5777 | 0.6019 | 0.6163 |
| <i>Lomatogonium carinthiacum</i>                 | 0.1135 | 0.1246 | 0.1327 |
| <i>Lomatogonium gamosepalum</i>                  | 0.3106 | 0.3275 | 0.3375 |
| <i>Lomatogonium macranthum</i>                   | 0.4487 | 0.328  | 0.2937 |
| <i>Lomatogonium rotatum</i>                      | 0.1631 | 0.1825 | 0.299  |
| <i>Lonicera caerulea</i>                         | 0.4582 | 0.5768 | 0.6551 |
| <i>Lonicera chrysantha</i>                       | 0.1815 | 0.2095 | 0.2269 |
| <i>Lonicera ferdinandi</i>                       | 0.3753 | 0.4536 | 0.5069 |
| <i>Lonicera hispida</i>                          | 0.4357 | 0.464  | 0.5218 |
| <i>Lonicera microphylla</i>                      | 0.2512 | 0.3154 | 0.3382 |
| <i>Lonicera nervosa</i>                          | 0.2871 | 0.3893 | 0.4854 |
| <i>Lonicera rupicola</i>                         | 0.0648 | 0.0884 | 0.1706 |
| <i>Lonicera rupicola</i> var. <i>syringantha</i> | 0.3504 | 0.359  | 0.3867 |
| <i>Lonicera tangutica</i>                        | 0.533  | 0.5634 | 0.5892 |

|                                                |        |        |        |
|------------------------------------------------|--------|--------|--------|
| <i>Lonicera trichosantha</i>                   | 0.2652 | 0.3305 | 0.389  |
| <i>Lonicera webbiana</i>                       | 0.2266 | 0.2814 | 0.3082 |
| <i>Lycium barbarum</i>                         | 0.2874 | 0.3188 | 0.3492 |
| <i>Lycium dasystemum</i>                       | 0.4279 | 0.4719 | 0.5018 |
| <i>Lycium ruthenicum</i>                       | 0.322  | 0.3954 | 0.3688 |
| <i>Maianthemum bifolium</i>                    | 0.0792 | 0.1652 | 0.2457 |
| <i>Malaxis monophyllos</i>                     | 0.1693 | 0.2385 | 0.2742 |
| <i>Malcolmia africana</i>                      | 0.2261 | 0.2301 | 0.2063 |
| <i>Malus transitoria</i>                       | 0.4179 | 0.4617 | 0.4882 |
| <i>Malva verticillata</i>                      | 0.2656 | 0.4199 | 0.5433 |
| <i>Malva verticillata</i> var. <i>rafiquii</i> | 0.3186 | 0.3549 | 0.3786 |
| <i>Meconopsis horridula</i>                    | 0.4655 | 0.6321 | 0.7543 |
| <i>Meconopsis integrifolia</i>                 | 0.5669 | 0.6124 | 0.6445 |
| <i>Meconopsis punicea</i>                      | 0.1487 | 0.3134 | 0.4929 |
| <i>Meconopsis quintuplinervia</i>              | 0.4389 | 0.5593 | 0.6391 |
| <i>Meconopsis racemosa</i>                     | 0.1591 | 0.1854 | 0.2025 |
| <i>Medicago archiducis-nicolai</i>             | 0.2074 | 0.2503 | 0.2372 |
| <i>Medicago edgeworthii</i>                    | 0.28   | 0.347  | 0.4113 |
| <i>Medicago lupulina</i>                       | 0.5427 | 0.5626 | 0.5763 |
| <i>Medicago ruthenica</i>                      | 0.2879 | 0.3762 | 0.3776 |
| <i>Medicago sativa</i>                         | 0.3316 | 0.4972 | 0.6315 |
| <i>Melica kozlovii</i>                         | 0.2904 | 0.32   | 0.3387 |
| <i>Melica przewalskyi</i>                      | 0.3225 | 0.3978 | 0.4566 |
| <i>Melica scabrosa</i>                         | 0.1929 | 0.4058 | 0.5988 |
| <i>Melilotus albus</i>                         | 0.2359 | 0.2621 | 0.2751 |
| <i>Melilotus officinalis</i>                   | 0.1163 | 0.1427 | 0.1657 |
| <i>Mentha canadensis</i>                       | 0.2937 | 0.4104 | 0.4397 |
| <i>Microula blepharolepis</i>                  | 0.524  | 0.6001 | 0.65   |
| <i>Microula diffusa</i>                        | 0.2103 | 0.303  | 0.3855 |
| <i>Microula pseudotrichocarpa</i>              | 0.3698 | 0.5311 | 0.6273 |
| <i>Microula pustulosa</i>                      | 0.189  | 0.1886 | 0.1984 |
| <i>Microula rockii</i>                         | 0.1063 | 0.1177 | 0.1219 |
| <i>Microula sikkimensis</i>                    | 0.4678 | 0.5213 | 0.5866 |
| <i>Microula tangutica</i>                      | 0.2369 | 0.2581 | 0.2751 |
| <i>Microula tibetica</i>                       | 0.4533 | 0.4899 | 0.5177 |
| <i>Microula trichocarpa</i>                    | 0.1566 | 0.2384 | 0.3105 |
| <i>Morina chinensis</i>                        | 0.2648 | 0.4561 | 0.5004 |
| <i>Morina kokonorica</i>                       | 0.1081 | 0.3012 | 0.5171 |
| <i>Myricaria bracteata</i>                     | 0.1592 | 0.2378 | 0.3106 |
| <i>Myricaria paniculata</i>                    | 0.4524 | 0.588  | 0.7048 |
| <i>Myricaria prostrata</i>                     | 0.6094 | 0.6243 | 0.6334 |
| <i>Myricaria squamosa</i>                      | 0.4069 | 0.4526 | 0.4837 |
| <i>Nannoglottis carpesioides</i>               | 0.314  | 0.574  | 0.7605 |
| <i>Nardostachys jatamansi</i>                  | 0.1384 | 0.1628 | 0.1833 |
| <i>Neopallasia pectinata</i>                   | 0.2386 | 0.3295 | 0.3984 |
| <i>Neotorularia humilis</i>                    | 0.5301 | 0.6413 | 0.7246 |
| <i>Neottianthe cucullata</i>                   | 0.3429 | 0.3992 | 0.4683 |
| <i>Nepeta coerulescens</i>                     | 0.3733 | 0.4094 | 0.4323 |
| <i>Nepeta prattii</i>                          | 0.1784 | 0.4094 | 0.5499 |
| <i>Nitraria sibirica</i>                       | 0.2385 | 0.3572 | 0.5058 |
| <i>Nitraria tangutorum</i>                     | 0.3545 | 0.4602 | 0.4604 |
| <i>Notopterygium franchetii</i>                | 0.4368 | 0.5664 | 0.6288 |
| <i>Notopterygium incisum</i>                   | 0.2856 | 0.4932 | 0.657  |
| <i>Olgaea tangutica</i>                        | 0.4639 | 0.4741 | 0.4762 |
| <i>Orinus kokonorica</i>                       | 0.2935 | 0.3092 | 0.3171 |
| <i>Oxygraphis glacialis</i>                    | 0.1527 | 0.1648 | 0.2097 |
| <i>Oxytropis aciphylla</i>                     | 0.5348 | 0.5362 | 0.535  |
| <i>Oxytropis deflexa</i>                       | 0.1606 | 0.1823 | 0.1933 |
| <i>Oxytropis densa</i>                         | 0.3759 | 0.4375 | 0.4498 |
| <i>Oxytropis falcata</i>                       | 0.2785 | 0.3024 | 0.3144 |
| <i>Oxytropis glabra</i>                        | 0.2444 | 0.2932 | 0.3255 |
| <i>Oxytropis imbricata</i>                     | 0.2015 | 0.2425 | 0.2678 |
| <i>Oxytropis kansuensis</i>                    | 0.249  | 0.273  | 0.2945 |
| <i>Oxytropis latibracteata</i>                 | 0.3418 | 0.48   | 0.4704 |
| <i>Oxytropis melanocalyx</i>                   | 0.2286 | 0.428  | 0.608  |
| <i>Oxytropis merkensis</i>                     | 0.2315 | 0.343  | 0.343  |

|                                                           |        |        |        |
|-----------------------------------------------------------|--------|--------|--------|
| <i>Oxytropis ochrantha</i>                                | 0.5006 | 0.6588 | 0.7763 |
| <i>Oxytropis ochrocephala</i>                             | 0.5727 | 0.5779 | 0.5823 |
| <i>Oxytropis proboscidea</i>                              | 0.4033 | 0.4408 | 0.4872 |
| <i>Oxytropis qinghaiensis</i>                             | 0.413  | 0.5051 | 0.574  |
| <i>Oxytropis stracheyana</i>                              | 0.6015 | 0.5871 | 0.6071 |
| <i>Oxytropis taochensis</i>                               | 0.2539 | 0.2814 | 0.2934 |
| <i>Oxytropis tragacanthoides</i>                          | 0.1989 | 0.2248 | 0.2574 |
| <i>Oxytropis yunnanensis</i>                              | 0.2704 | 0.523  | 0.723  |
| <i>Padus avium</i>                                        | 0.3615 | 0.3683 | 0.4691 |
| <i>Paeonia anomala</i> subsp. <i>veitchii</i>             | 0.1079 | 0.1449 | 0.1774 |
| <i>Paragymnopteris delavayi</i>                           | 0.2242 | 0.2482 | 0.2955 |
| <i>Paraquilegia anemonoides</i>                           | 0.4797 | 0.6803 | 0.8112 |
| <i>Paraquilegia microphylla</i>                           | 0.0674 | 0.0754 | 0.0828 |
| <i>Parasenecio deltophyllus</i>                           | 0.3408 | 0.5683 | 0.7375 |
| <i>Parasenecio roborowskii</i>                            | 0.4471 | 0.5333 | 0.5497 |
| <i>Parietaria micrantha</i>                               | 0.2019 | 0.2184 | 0.2279 |
| <i>Parnassia lutea</i>                                    | 0.5386 | 0.666  | 0.7616 |
| <i>Parnassia oreophila</i>                                | 0.1812 | 0.3078 | 0.5102 |
| <i>Parnassia trinervis</i>                                | 0.3326 | 0.5675 | 0.7311 |
| <i>Parnassia viridiflora</i>                              | 0.1074 | 0.1595 | 0.2824 |
| <i>Pedicularis abrotanifolia</i>                          | 0.598  | 0.6925 | 0.759  |
| <i>Pedicularis alaschanica</i>                            | 0.2902 | 0.3048 | 0.3275 |
| <i>Pedicularis armata</i>                                 | 0.1265 | 0.2861 | 0.4421 |
| <i>Pedicularis cheilanthisfolia</i>                       | 0.3021 | 0.3311 | 0.3494 |
| <i>Pedicularis chinensis</i>                              | 0.1793 | 0.3288 | 0.3736 |
| <i>Pedicularis cranolopha</i>                             | 0.1827 | 0.2814 | 0.3629 |
| <i>Pedicularis croizatiana</i>                            | 0.2563 | 0.5432 | 0.7306 |
| <i>Pedicularis curvifolia</i>                             | 0.1393 | 0.2057 | 0.2728 |
| <i>Pedicularis gracilis</i> subsp. <i>sinensis</i>        | 0.3138 | 0.3438 | 0.3628 |
| <i>Pedicularis heydei</i>                                 | 0.6201 | 0.637  | 0.6521 |
| <i>Pedicularis ingens</i>                                 | 0.3116 | 0.5081 | 0.6664 |
| <i>Pedicularis integrifolia</i>                           | 0.2865 | 0.3206 | 0.3422 |
| <i>Pedicularis kansuensis</i>                             | 0.5918 | 0.5984 | 0.6077 |
| <i>Pedicularis kansuensis</i> subsp. <i>kokonorica</i>    | 0.5859 | 0.6024 | 0.6288 |
| <i>Pedicularis lachnoglossa</i>                           | 0.1088 | 0.1775 | 0.3492 |
| <i>Pedicularis lasiophrys</i>                             | 0.2133 | 0.3413 | 0.4704 |
| <i>Pedicularis longiflora</i>                             | 0.4699 | 0.4768 | 0.4778 |
| <i>Pedicularis longiflora</i> var. <i>tubiformis</i>      | 0.5376 | 0.5878 | 0.62   |
| <i>Pedicularis lyrata</i>                                 | 0.5621 | 0.6169 | 0.5632 |
| <i>Pedicularis muscicola</i>                              | 0.1867 | 0.2161 | 0.2299 |
| <i>Pedicularis oederi</i>                                 | 0.4603 | 0.6519 | 0.7797 |
| <i>Pedicularis oederi</i> var. <i>sinensis</i>            | 0.3835 | 0.4604 | 0.4297 |
| <i>Pedicularis pheulpintii</i> subsp. <i>chilienensis</i> | 0.0952 | 0.2262 | 0.3666 |
| <i>Pedicularis pilostachya</i>                            | 0.608  | 0.6458 | 0.6714 |
| <i>Pedicularis plicata</i>                                | 0.0853 | 0.0949 | 0.1    |
| <i>Pedicularis przewalskii</i>                            | 0.2722 | 0.3561 | 0.4159 |
| <i>Pedicularis pseudomelampyryflora</i>                   | 0.1785 | 0.2041 | 0.2191 |
| <i>Pedicularis rhinanthoides</i>                          | 0.3828 | 0.4928 | 0.6172 |
| <i>Pedicularis rhinanthoides</i> subsp. <i>labellata</i>  | 0.0903 | 0.2092 | 0.3247 |
| <i>Pedicularis roborowskii</i>                            | 0.6223 | 0.6365 | 0.6483 |
| <i>Pedicularis rudis</i>                                  | 0.1688 | 0.1885 | 0.1998 |
| <i>Pedicularis scolopax</i>                               | 0.3686 | 0.5148 | 0.5455 |
| <i>Pedicularis semitorta</i>                              | 0.2436 | 0.5122 | 0.7312 |
| <i>Pedicularis szetschuanica</i>                          | 0.2086 | 0.4338 | 0.6258 |
| <i>Pedicularis ternata</i>                                | 0.1481 | 0.2017 | 0.2423 |
| <i>Pedicularis trichoglossa</i>                           | 0.4053 | 0.5885 | 0.7503 |
| <i>Pedicularis verticillata</i>                           | 0.2914 | 0.4425 | 0.4066 |
| <i>Peganum multiseptum</i>                                | 0.3802 | 0.6398 | 0.8175 |
| <i>Pennisetum alopecuroides</i>                           | 0.3571 | 0.3652 | 0.3802 |
| <i>Pennisetum flaccidum</i>                               | 0.5822 | 0.61   | 0.6284 |
| <i>Phedimus aizoon</i>                                    | 0.3925 | 0.462  | 0.5101 |
| <i>Philadelphus incanus</i>                               | 0.3631 | 0.4064 | 0.4337 |
| <i>Philadelphus kansuensis</i>                            | 0.0627 | 0.1856 | 0.33   |
| <i>Phlomis dentosa</i>                                    | 0.5617 | 0.5813 | 0.5982 |
| <i>Phragmites australis</i>                               | 0.6321 | 0.6321 | 0.6321 |
| <i>Phyllolobium heydei</i>                                | 0.3596 | 0.4906 | 0.5254 |

|                                                        |        |        |        |
|--------------------------------------------------------|--------|--------|--------|
| <i>Phyllolobium tribulifolium</i>                      | 0.5062 | 0.5133 | 0.5402 |
| <i>Picea asperata</i>                                  | 0.3509 | 0.4368 | 0.4287 |
| <i>Picea crassifolia</i>                               | 0.3339 | 0.3758 | 0.4083 |
| <i>Picea likiangensis</i> var. <i>rubescens</i>        | 0.5523 | 0.6281 | 0.6824 |
| <i>Picea purpurea</i>                                  | 0.2996 | 0.3817 | 0.4707 |
| <i>Picea wilsonii</i>                                  | 0.5555 | 0.5645 | 0.5626 |
| <i>Picris japonica</i>                                 | 0.2649 | 0.46   | 0.4181 |
| <i>Pimpinella smithii</i>                              | 0.2974 | 0.3367 | 0.3626 |
| <i>Pinus tabuliformis</i>                              | 0.5059 | 0.6279 | 0.7068 |
| <i>Piptatherum munroi</i>                              | 0.1117 | 0.2489 | 0.3929 |
| <i>Pisum sativum</i>                                   | 0.1887 | 0.201  | 0.2079 |
| <i>Plantago depressa</i>                               | 0.3355 | 0.4191 | 0.334  |
| <i>Plantago minuta</i>                                 | 0.2682 | 0.2999 | 0.3194 |
| <i>Platycladus orientalis</i>                          | 0.5283 | 0.5377 | 0.5864 |
| <i>Pleurospermum franchetianum</i>                     | 0.2776 | 0.4443 | 0.5994 |
| <i>Pleurospermum hedinii</i>                           | 0.1084 | 0.2047 | 0.3398 |
| <i>Pleurospermum hookeri</i> var. <i>thomsonii</i>     | 0.279  | 0.58   | 0.8264 |
| <i>Pleurospermum pulszkyi</i>                          | 0.4069 | 0.4993 | 0.5129 |
| <i>Pleurospermum szechenyii</i>                        | 0.3847 | 0.4229 | 0.4452 |
| <i>Pleurospermum tsekuense</i>                         | 0.0171 | 0.0328 | 0.057  |
| <i>Pleurospermum wilsonii</i>                          | 0.4889 | 0.5271 | 0.5513 |
| <i>Pleurospermum wrightianum</i>                       | 0.361  | 0.4371 | 0.4382 |
| <i>Plumbagella micrantha</i>                           | 0.4005 | 0.5202 | 0.5733 |
| <i>Poa abbreviata</i>                                  | 0.0457 | 0.1422 | 0.3375 |
| <i>Poa albertii</i>                                    | 0.1541 | 0.186  | 0.2755 |
| <i>Poa annua</i>                                       | 0.2432 | 0.2928 | 0.332  |
| <i>Poa araratica</i>                                   | 0.1777 | 0.1929 | 0.1886 |
| <i>Poa araratica</i> subsp. <i>ianthina</i>            | 0.1939 | 0.2336 | 0.3854 |
| <i>Poa attenuata</i>                                   | 0.6116 | 0.6217 | 0.6284 |
| <i>Poa hylobates</i>                                   | 0.2699 | 0.3699 | 0.523  |
| <i>Poa pratensis</i>                                   | 0.2966 | 0.3422 | 0.3833 |
| <i>Poa pratensis</i> subsp. <i>alpigena</i>            | 0.6065 | 0.6171 | 0.6257 |
| <i>Poa tibetica</i>                                    | 0.2995 | 0.4398 | 0.6088 |
| <i>Poa versicolor</i> subsp. <i>orinosa</i>            | 0.3523 | 0.5281 | 0.7334 |
| <i>Polemonium caeruleum</i>                            | 0.527  | 0.5529 | 0.5701 |
| <i>Polygala sibirica</i>                               | 0.2121 | 0.4076 | 0.6066 |
| <i>Polygonatum acuminatifolium</i>                     | 0.4795 | 0.6636 | 0.8011 |
| <i>Polygonatum cirrhifolium</i>                        | 0.3644 | 0.5023 | 0.6089 |
| <i>Polygonatum odoratum</i>                            | 0.3874 | 0.6379 | 0.8153 |
| <i>Polygonatum sibiricum</i>                           | 0.2767 | 0.4792 | 0.6683 |
| <i>Polygonatum verticillatum</i>                       | 0.1392 | 0.1456 | 0.14   |
| <i>Polygonum acerosum</i>                              | 0.4324 | 0.558  | 0.64   |
| <i>Polygonum amphibium</i>                             | 0.1977 | 0.3181 | 0.4247 |
| <i>Polygonum aviculare</i>                             | 0.3167 | 0.4553 | 0.5231 |
| <i>Polygonum cyanandrum</i>                            | 0.3125 | 0.5994 | 0.8233 |
| <i>Polygonum divaricatum</i>                           | 0.2468 | 0.4256 | 0.6063 |
| <i>Polygonum fertile</i>                               | 0.2381 | 0.3272 | 0.3137 |
| <i>Polygonum glaciale</i>                              | 0.1995 | 0.2245 | 0.2273 |
| <i>Polygonum hookeri</i>                               | 0.3913 | 0.44   | 0.4762 |
| <i>Polygonum hydropiper</i>                            | 0.3433 | 0.44   | 0.505  |
| <i>Polygonum lapathifolium</i>                         | 0.5744 | 0.6358 | 0.6171 |
| <i>Polygonum lapathifolium</i> var. <i>lanatum</i>     | 0.2204 | 0.3124 | 0.3414 |
| <i>Polygonum macrophyllum</i>                          | 0.1607 | 0.1761 | 0.1847 |
| <i>Polygonum macrophyllum</i> var. <i>stenophyllum</i> | 0.2781 | 0.3002 | 0.3483 |
| <i>Polygonum nepalense</i>                             | 0.4596 | 0.6525 | 0.8138 |
| <i>Polygonum sibiricum</i>                             | 0.1991 | 0.3337 | 0.4622 |
| <i>Polygonum sibiricum</i> var. <i>thomsonii</i>       | 0.2444 | 0.4157 | 0.5396 |
| <i>Polygonum sparsipilosum</i>                         | 0.5534 | 0.6782 | 0.7658 |
| <i>Polygonum sparsipilosum</i> var. <i>hubertii</i>    | 0.4322 | 0.477  | 0.504  |
| <i>Polygonum viviparum</i>                             | 0.2983 | 0.4583 | 0.4842 |
| <i>Polygonum viviparum</i> var. <i>tenuifolium</i>     | 0.1177 | 0.1543 | 0.1811 |
| <i>Polypogon monspeliensis</i>                         | 0.3061 | 0.531  | 0.6952 |
| <i>Polystichum sinense</i>                             | 0.5857 | 0.5983 | 0.618  |
| <i>Pomatosace filicula</i>                             | 0.5891 | 0.5941 | 0.6103 |
| <i>Ponerorchis chusua</i>                              | 0.5546 | 0.5713 | 0.581  |
| <i>Populus cathayana</i>                               | 0.4728 | 0.5522 | 0.5442 |



|                                                        |        |        |        |
|--------------------------------------------------------|--------|--------|--------|
| <i>Populus cathayana</i> var. <i>latifolia</i>         | 0.1658 | 0.1844 | 0.1955 |
| <i>Populus davidiana</i>                               | 0.4236 | 0.4235 | 0.4266 |
| <i>Populus simonii</i>                                 | 0.249  | 0.4132 | 0.5431 |
| <i>Potentilla acaulis</i>                              | 0.0289 | 0.0451 | 0.0661 |
| <i>Potentilla angustiloba</i>                          | 0.5969 | 0.6488 | 0.687  |
| <i>Potentilla anserina</i>                             | 0.2801 | 0.4692 | 0.5958 |
| <i>Potentilla bifurca</i>                              | 0.0329 | 0.0449 | 0.0572 |
| <i>Potentilla bifurca</i> var. <i>humilior</i>         | 0.3979 | 0.3815 | 0.3775 |
| <i>Potentilla fruticosa</i>                            | 0.6138 | 0.622  | 0.6269 |
| <i>Potentilla fruticosa</i> var. <i>albicans</i>       | 0.3296 | 0.4837 | 0.5584 |
| <i>Potentilla glabra</i>                               | 0.6274 | 0.6503 | 0.6666 |
| <i>Potentilla glabra</i> var. <i>mandshurica</i>       | 0.4352 | 0.6323 | 0.7665 |
| <i>Potentilla granulosa</i>                            | 0.5504 | 0.5006 | 0.4737 |
| <i>Potentilla multicaulis</i>                          | 0.3702 | 0.3884 | 0.4034 |
| <i>Potentilla multifida</i>                            | 0.5823 | 0.6017 | 0.6153 |
| <i>Potentilla multifida</i> var. <i>nubigena</i>       | 0.4477 | 0.5692 | 0.7002 |
| <i>Potentilla multifida</i> var. <i>ornithopoda</i>    | 0.6321 | 0.6324 | 0.6326 |
| <i>Potentilla nivea</i>                                | 0.5696 | 0.6135 | 0.6412 |
| <i>Potentilla parvifolia</i>                           | 0.2695 | 0.4891 | 0.7389 |
| <i>Potentilla plumosa</i>                              | 0.5141 | 0.5749 | 0.6144 |
| <i>Potentilla potaninii</i>                            | 0.5093 | 0.5469 | 0.5649 |
| <i>Potentilla saundersiana</i>                         | 0.0129 | 0.0223 | 0.0997 |
| <i>Potentilla saundersiana</i> var. <i>caespitosa</i>  | 0.2178 | 0.4249 | 0.5971 |
| <i>Potentilla saundersiana</i> var. <i>subpinnata</i>  | 0.306  | 0.3091 | 0.3117 |
| <i>Potentilla sischanensis</i>                         | 0.1972 | 0.3962 | 0.5587 |
| <i>Potentilla sischanensis</i> var. <i>peterae</i>     | 0.6095 | 0.6188 | 0.636  |
| <i>Potentilla tanacetifolia</i>                        | 0.3232 | 0.5805 | 0.7587 |
| <i>Primula advena</i>                                  | 0.3755 | 0.4852 | 0.573  |
| <i>Primula nutans</i>                                  | 0.6054 | 0.6338 | 0.6537 |
| <i>Primula sikkimensis</i>                             | 0.2527 | 0.2966 | 0.2504 |
| <i>Primula stenocalyx</i>                              | 0.2427 | 0.2951 | 0.2276 |
| <i>Primula tangutica</i>                               | 0.5077 | 0.5393 | 0.5577 |
| <i>Primula woodwardii</i>                              | 0.4552 | 0.4706 | 0.4455 |
| <i>Prunus salicina</i>                                 | 0.2107 | 0.4093 | 0.5505 |
| <i>Przewalskia tangutica</i>                           | 0.4452 | 0.475  | 0.522  |
| <i>Pseudostellaria heterantha</i>                      | 0.3863 | 0.4754 | 0.536  |
| <i>Pterocephalus hookeri</i>                           | 0.5284 | 0.5678 | 0.638  |
| <i>Pterygocalyx volubilis</i>                          | 0.5286 | 0.5453 | 0.5523 |
| <i>Ptilagrostis concinna</i>                           | 0.4337 | 0.4487 | 0.4578 |
| <i>Ptilagrostis dichotoma</i>                          | 0.2348 | 0.2897 | 0.2477 |
| <i>Puccinellia altaica</i>                             | 0.1767 | 0.2832 | 0.3714 |
| <i>Puccinellia tenuiflora</i>                          | 0.5892 | 0.6205 | 0.6403 |
| <i>Pulicaria insignis</i>                              | 0.2421 | 0.3712 | 0.4887 |
| <i>Pulsatilla ambigua</i>                              | 0.2557 | 0.2992 | 0.4177 |
| <i>Pycnophlinthus uniflora</i>                         | 0.6034 | 0.6034 | 0.6034 |
| <i>Ranunculus brotherusii</i>                          | 0.3856 | 0.5984 | 0.7491 |
| <i>Ranunculus chinensis</i>                            | 0.1776 | 0.2002 | 0.213  |
| <i>Ranunculus furcatifidus</i>                         | 0.5186 | 0.6333 | 0.7092 |
| <i>Ranunculus glareosus</i>                            | 0.4791 | 0.5088 | 0.5274 |
| <i>Ranunculus hirtellus</i> var. <i>orientalis</i>     | 0.2965 | 0.4348 | 0.5612 |
| <i>Ranunculus indivisus</i>                            | 0.2656 | 0.5479 | 0.7698 |
| <i>Ranunculus japonicus</i>                            | 0.3329 | 0.3594 | 0.3759 |
| <i>Ranunculus membranaceus</i>                         | 0.2319 | 0.3037 | 0.289  |
| <i>Ranunculus nephelogenes</i>                         | 0.2653 | 0.2919 | 0.3076 |
| <i>Ranunculus nephelogenes</i> var. <i>longicaulis</i> | 0.4437 | 0.5642 | 0.5789 |
| <i>Ranunculus pulchellus</i>                           | 0.1894 | 0.2505 | 0.2563 |
| <i>Ranunculus tanguticus</i>                           | 0.4512 | 0.6255 | 0.7451 |
| <i>Reaumuria kaschgarica</i>                           | 0.1581 | 0.2196 | 0.2673 |
| <i>Reaumuria soongarica</i>                            | 0.3302 | 0.398  | 0.4648 |
| <i>Rhamnus tangutica</i>                               | 0.2837 | 0.4919 | 0.6487 |
| <i>Rhaponticum repens</i>                              | 0.299  | 0.3289 | 0.3253 |
| <i>Rheum likiangense</i>                               | 0.4799 | 0.4794 | 0.4768 |
| <i>Rheum moorcroftianum</i>                            | 0.3961 | 0.5791 | 0.7052 |
| <i>Rheum palmatum</i>                                  | 0.4392 | 0.484  | 0.5299 |
| <i>Rheum przewalskyi</i>                               | 0.1692 | 0.2588 | 0.3288 |
| <i>Rheum pumilum</i>                                   | 0.5388 | 0.5435 | 0.5463 |

|                                                      |        |        |        |
|------------------------------------------------------|--------|--------|--------|
| <i>Rheum reticulatum</i>                             | 0.2617 | 0.3046 | 0.3398 |
| <i>Rheum rhomboideum</i>                             | 0.5413 | 0.5848 | 0.6157 |
| <i>Rheum spiciforme</i>                              | 0.6303 | 0.6402 | 0.6469 |
| <i>Rheum tanguticum</i>                              | 0.277  | 0.4615 | 0.6144 |
| <i>Rhodiola coccinea</i>                             | 0.1629 | 0.1818 | 0.1834 |
| <i>Rhodiola dumulosa</i>                             | 0.3959 | 0.5765 | 0.7051 |
| <i>Rhodiola kirilowii</i>                            | 0.4916 | 0.5267 | 0.5437 |
| <i>Rhodiola quadrifida</i>                           | 0.2357 | 0.3818 | 0.5051 |
| <i>Rhodiola tangutica</i>                            | 0.4304 | 0.4713 | 0.5016 |
| <i>Rhododendron anthopogonoides</i>                  | 0.6058 | 0.6086 | 0.6243 |
| <i>Rhododendron capitatum</i>                        | 0.2812 | 0.4491 | 0.5262 |
| <i>Rhododendron magniflorum</i>                      | 0.1268 | 0.257  | 0.3599 |
| <i>Rhododendron nivale</i>                           | 0.267  | 0.2919 | 0.3072 |
| <i>Rhododendron przewalskii</i>                      | 0.2878 | 0.491  | 0.5462 |
| <i>Rhododendron przewalskii subsp. chrysophyllum</i> | 0.5317 | 0.5343 | 0.5363 |
| <i>Rhododendron thymifolium</i>                      | 0.2732 | 0.4567 | 0.4081 |
| <i>Ribes alpestre</i>                                | 0.3473 | 0.5543 | 0.7041 |
| <i>Ribes glaciale</i>                                | 0.4595 | 0.5407 | 0.6095 |
| <i>Ribes himalense</i>                               | 0.2295 | 0.2269 | 0.2352 |
| <i>Ribes himalense var. verruculosum</i>             | 0.0416 | 0.0463 | 0.1362 |
| <i>Ribes meyeri</i>                                  | 0.3616 | 0.4017 | 0.5276 |
| <i>Ribes pseudofasciculatum</i>                      | 0.0317 | 0.0347 | 0.036  |
| <i>Ribes stenocarpum</i>                             | 0.287  | 0.4436 | 0.5551 |
| <i>Rorippa palustris</i>                             | 0.1796 | 0.1963 | 0.2051 |
| <i>Rosa giraldii</i>                                 | 0.0566 | 0.0793 | 0.0997 |
| <i>Rosa moyesii</i>                                  | 0.551  | 0.5584 | 0.5508 |
| <i>Rosa omeiensis</i>                                | 0.0645 | 0.0798 | 0.1615 |
| <i>Rosa sweginzowii</i>                              | 0.2423 | 0.3583 | 0.3435 |
| <i>Rosa willmottiae</i>                              | 0.379  | 0.4114 | 0.4334 |
| <i>Rubia cordifolia</i>                              | 0.0827 | 0.0893 | 0.1494 |
| <i>Rubia sylvatica</i>                               | 0.3888 | 0.4051 | 0.4158 |
| <i>Rubus irritans</i>                                | 0.2324 | 0.267  | 0.301  |
| <i>Rumex acetosa</i>                                 | 0.0899 | 0.1067 | 0.1437 |
| <i>Rumex aquaticus</i>                               | 0.148  | 0.2005 | 0.243  |
| <i>Rumex crispus</i>                                 | 0.1533 | 0.1491 | 0.1717 |
| <i>Rumex longifolius</i>                             | 0.3693 | 0.5238 | 0.6285 |
| <i>Rumex nepalensis</i>                              | 0.36   | 0.3988 | 0.4093 |
| <i>Rumex patientia</i>                               | 0.1865 | 0.4076 | 0.6199 |
| <i>Salicornia europaea</i>                           | 0.3493 | 0.3569 | 0.4032 |
| <i>Salix atopantha</i>                               | 0.1272 | 0.1976 | 0.2608 |
| <i>Salix cheilophila</i>                             | 0.386  | 0.4261 | 0.4511 |
| <i>Salix lamashanensis</i>                           | 0.088  | 0.0905 | 0.1385 |
| <i>Salix myrtilleacea</i>                            | 0.4018 | 0.4316 | 0.4661 |
| <i>Salix oritrepha</i>                               | 0.2501 | 0.2125 | 0.1879 |
| <i>Salix oritrepha var. amnematchinensis</i>         | 0.2965 | 0.3609 | 0.3424 |
| <i>Salix paraplesia</i>                              | 0.3347 | 0.564  | 0.7334 |
| <i>Salix rehderiana</i>                              | 0.3692 | 0.4148 | 0.4354 |
| <i>Salix sclerophylla</i>                            | 0.1673 | 0.2299 | 0.3988 |
| <i>Salix sinica</i>                                  | 0.4132 | 0.4897 | 0.5567 |
| <i>Salix spathulifolia</i>                           | 0.5111 | 0.5116 | 0.5148 |
| <i>Salix taoensis</i>                                | 0.3246 | 0.426  | 0.5149 |
| <i>Salsola abrotanoides</i>                          | 0.5667 | 0.5667 | 0.5667 |
| <i>Salsola collina</i>                               | 0.2014 | 0.3358 | 0.46   |
| <i>Salsola tragus</i>                                | 0.1513 | 0.18   | 0.1983 |
| <i>Salvia prattii</i>                                | 0.2414 | 0.2718 | 0.2906 |
| <i>Salvia przewalskii</i>                            | 0.1086 | 0.1233 | 0.1315 |
| <i>Salvia roborowskii</i>                            | 0.4716 | 0.5818 | 0.6571 |
| <i>Sambucus adnata</i>                               | 0.6181 | 0.5995 | 0.5861 |
| <i>Sanguisorba officinalis</i>                       | 0.5665 | 0.5718 | 0.5751 |
| <i>Sanicula giraldii</i>                             | 0.5457 | 0.6058 | 0.6509 |
| <i>Saussurea acrophila</i>                           | 0.6098 | 0.619  | 0.6184 |
| <i>Saussurea amara</i>                               | 0.4332 | 0.4727 | 0.4962 |
| <i>Saussurea andryaloides</i>                        | 0.5358 | 0.6227 | 0.6816 |
| <i>Saussurea apus</i>                                | 0.0657 | 0.0835 | 0.0993 |
| <i>Saussurea arenaria</i>                            | 0.5264 | 0.5808 | 0.6238 |
| <i>Saussurea aster</i>                               | 0.6166 | 0.6202 | 0.6224 |

|                                    |        |        |        |
|------------------------------------|--------|--------|--------|
| <i>Saussurea brunneopilosa</i>     | 0.4297 | 0.4599 | 0.4775 |
| <i>Saussurea cana</i>              | 0.4801 | 0.4801 | 0.4801 |
| <i>Saussurea daurica</i>           | 0.0342 | 0.0501 | 0.0676 |
| <i>Saussurea depsangensis</i>      | 0.1072 | 0.1232 | 0.1321 |
| <i>Saussurea dzeurensis</i>        | 0.574  | 0.6808 | 0.7569 |
| <i>Saussurea epilobioides</i>      | 0.3339 | 0.5507 | 0.6165 |
| <i>Saussurea erubescens</i>        | 0.4077 | 0.4689 | 0.508  |
| <i>Saussurea globosa</i>           | 0.6308 | 0.6308 | 0.6308 |
| <i>Saussurea gnaphalodes</i>       | 0.2298 | 0.3127 | 0.344  |
| <i>Saussurea graminea</i>          | 0.4159 | 0.6067 | 0.7585 |
| <i>Saussurea hieracioides</i>      | 0.4    | 0.624  | 0.7771 |
| <i>Saussurea inversa</i>           | 0.3226 | 0.471  | 0.5919 |
| <i>Saussurea katochaete</i>        | 0.1974 | 0.2019 | 0.2238 |
| <i>Saussurea leontodontoides</i>   | 0.4525 | 0.4572 | 0.515  |
| <i>Saussurea medusa</i>            | 0.4004 | 0.5952 | 0.7295 |
| <i>Saussurea merinoi</i>           | 0.0798 | 0.0921 | 0.0988 |
| <i>Saussurea minuta</i>            | 0.2213 | 0.2828 | 0.3227 |
| <i>Saussurea nigrescens</i>        | 0.5485 | 0.5715 | 0.5583 |
| <i>Saussurea parviflora</i>        | 0.353  | 0.353  | 0.3537 |
| <i>Saussurea paxiana</i>           | 0.2384 | 0.2612 | 0.2751 |
| <i>Saussurea phaeantha</i>         | 0.0926 | 0.0961 | 0.1016 |
| <i>Saussurea przewalskii</i>       | 0.2668 | 0.3193 | 0.3503 |
| <i>Saussurea semifasciata</i>      | 0.2304 | 0.2026 | 0.2076 |
| <i>Saussurea stella</i>            | 0.3585 | 0.4001 | 0.4793 |
| <i>Saussurea subulata</i>          | 0.3112 | 0.5217 | 0.6824 |
| <i>Saussurea subulisquama</i>      | 0.2805 | 0.2891 | 0.2769 |
| <i>Saussurea superba</i>           | 0.0506 | 0.0649 | 0.1692 |
| <i>Saussurea sylvatica</i>         | 0.4934 | 0.5298 | 0.5524 |
| <i>Saussurea tangutica</i>         | 0.1933 | 0.3925 | 0.5688 |
| <i>Saussurea tatsienensis</i>      | 0.3271 | 0.3312 | 0.3483 |
| <i>Saussurea thoroldii</i>         | 0.3081 | 0.3081 | 0.3081 |
| <i>Saussurea tibetica</i>          | 0.5642 | 0.6198 | 0.655  |
| <i>Saussurea tsoongii</i>          | 0.6089 | 0.6136 | 0.6246 |
| <i>Saussurea wellbyi</i>           | 0.1175 | 0.1322 | 0.144  |
| <i>Saussurea woodiana</i>          | 0.237  | 0.2411 | 0.2455 |
| <i>Saxifraga atrata</i>            | 0.4695 | 0.5569 | 0.5327 |
| <i>Saxifraga consanguinea</i>      | 0.372  | 0.3694 | 0.4003 |
| <i>Saxifraga egregia</i>           | 0.1894 | 0.4517 | 0.7651 |
| <i>Saxifraga heleonastes</i>       | 0.3081 | 0.3646 | 0.4043 |
| <i>Saxifraga hirculus</i>          | 0.1528 | 0.1755 | 0.1886 |
| <i>Saxifraga melanocentra</i>      | 0.3215 | 0.4532 | 0.5025 |
| <i>Saxifraga nanella</i>           | 0.2475 | 0.2658 | 0.3707 |
| <i>Saxifraga przewalskii</i>       | 0.3923 | 0.4911 | 0.568  |
| <i>Saxifraga pseudohirculus</i>    | 0.1505 | 0.1696 | 0.177  |
| <i>Saxifraga signata</i>           | 0.2055 | 0.3578 | 0.498  |
| <i>Saxifraga sinomontana</i>       | 0.2529 | 0.4553 | 0.6183 |
| <i>Saxifraga tangutica</i>         | 0.3366 | 0.3852 | 0.4316 |
| <i>Saxifraga tibetica</i>          | 0.2335 | 0.4047 | 0.3589 |
| <i>Saxifraga unguiculata</i>       | 0.2467 | 0.3401 | 0.4104 |
| <i>Scorzonera albicaulis</i>       | 0.562  | 0.5848 | 0.5993 |
| <i>Scorzonera mongolica</i>        | 0.363  | 0.4034 | 0.44   |
| <i>Scorzonera pseudodivaricata</i> | 0.5573 | 0.5782 | 0.573  |
| <i>Scrophularia incisa</i>         | 0.1686 | 0.2524 | 0.2617 |
| <i>Scutellaria scordifolia</i>     | 0.2852 | 0.336  | 0.3848 |
| <i>Sedum celatum</i>               | 0.4019 | 0.506  | 0.6398 |
| <i>Sedum fischeri</i>              | 0.5084 | 0.6138 | 0.7029 |
| <i>Sedum glabosum</i>              | 0.5656 | 0.6619 | 0.7281 |
| <i>Sedum przewalskii</i>           | 0.0472 | 0.0506 | 0.0522 |
| <i>Sedum roborowskii</i>           | 0.2915 | 0.3686 | 0.3506 |
| <i>Sedum tsinghaicum</i>           | 0.3509 | 0.4142 | 0.5392 |
| <i>Sedum ulricae</i>               | 0.4183 | 0.5329 | 0.6095 |
| <i>Senecio argunensis</i>          | 0.3969 | 0.5703 | 0.6898 |
| <i>Senecio diversipinnus</i>       | 0.0403 | 0.0524 | 0.157  |
| <i>Senecio dubitabilis</i>         | 0.2002 | 0.2186 | 0.2288 |
| <i>Senecio krascheninnikovii</i>   | 0.0851 | 0.0953 | 0.0983 |
| <i>Senecio thianschanicus</i>      | 0.4919 | 0.4893 | 0.4895 |

|                                                      |        |        |        |
|------------------------------------------------------|--------|--------|--------|
| <i>Senecio vulgaris</i>                              | 0.6113 | 0.6553 | 0.684  |
| <i>Setaria viridis</i>                               | 0.0814 | 0.0939 | 0.1004 |
| <i>Sibbaldia adpressa</i>                            | 0.3392 | 0.5212 | 0.5596 |
| <i>Sibbaldia procumbens</i> var. <i>aphanopetala</i> | 0.5731 | 0.6811 | 0.7565 |
| <i>Sibbaldia tetrandra</i>                           | 0.0465 | 0.0579 | 0.1251 |
| <i>Sibiraea angustata</i>                            | 0.4303 | 0.4819 | 0.5162 |
| <i>Sibiraea laevigata</i>                            | 0.1918 | 0.2908 | 0.2525 |
| <i>Silene aprica</i>                                 | 0.5131 | 0.6351 | 0.7192 |
| <i>Silene conoidea</i>                               | 0.2786 | 0.4194 | 0.553  |
| <i>Silene gonosperma</i>                             | 0.1277 | 0.2053 | 0.3141 |
| <i>Silene gracilicaulis</i>                          | 0.2422 | 0.4292 | 0.6    |
| <i>Silene graminifolia</i>                           | 0.1828 | 0.3073 | 0.4269 |
| <i>Silene himalayensis</i>                           | 0.5812 | 0.5976 | 0.6075 |
| <i>Silene jensseensis</i>                            | 0.449  | 0.5093 | 0.5275 |
| <i>Silene kialensis</i>                              | 0.6266 | 0.6265 | 0.6293 |
| <i>Silene nangqenensis</i>                           | 0.5757 | 0.6214 | 0.6711 |
| <i>Silene nepalensis</i>                             | 0.3917 | 0.467  | 0.4685 |
| <i>Silene nigrescens</i>                             | 0.3352 | 0.5812 | 0.7598 |
| <i>Silene pterosperma</i>                            | 0.2635 | 0.2309 | 0.2302 |
| <i>Silene repens</i>                                 | 0.3671 | 0.5209 | 0.6432 |
| <i>Silene yetii</i>                                  | 0.2646 | 0.3354 | 0.376  |
| <i>Sinacalia tangutica</i>                           | 0.1624 | 0.162  | 0.1552 |
| <i>Sinocarum vaginatum</i>                           | 0.5931 | 0.6482 | 0.688  |
| <i>Sinochasea trigyna</i>                            | 0.1774 | 0.1718 | 0.1796 |
| <i>Sinopodophyllum hexandrum</i>                     | 0.3234 | 0.4719 | 0.4483 |
| <i>Sisymbriopsis mollipila</i>                       | 0.3707 | 0.5545 | 0.6797 |
| <i>Sisymbrium heteromallum</i>                       | 0.28   | 0.3326 | 0.3083 |
| <i>Smelowskia tibetica</i>                           | 0.3048 | 0.3159 | 0.3224 |
| <i>Solanum japonense</i>                             | 0.3007 | 0.4412 | 0.4222 |
| <i>Solms-Laubachia eurycarpa</i>                     | 0.2726 | 0.4424 | 0.604  |
| <i>Sonchus oleraceus</i>                             | 0.4631 | 0.4812 | 0.49   |
| <i>Sonchus wightianus</i>                            | 0.1715 | 0.3174 | 0.4571 |
| <i>Sorbus koehneana</i>                              | 0.5202 | 0.6545 | 0.7616 |
| <i>Sorbus tapashana</i>                              | 0.6234 | 0.6231 | 0.6314 |
| <i>Sorbus tianschanica</i>                           | 0.2261 | 0.3166 | 0.3455 |
| <i>Soroseris erysimoides</i>                         | 0.6111 | 0.624  | 0.6321 |
| <i>Soroseris glomerata</i>                           | 0.4515 | 0.4937 | 0.5166 |
| <i>Soroseris hookeriana</i>                          | 0.2598 | 0.3844 | 0.4791 |
| <i>Spergularia marina</i>                            | 0.3029 | 0.355  | 0.3875 |
| <i>Sphaerophysa salsula</i>                          | 0.3821 | 0.6259 | 0.822  |
| <i>Sphallerocarpus gracilis</i>                      | 0.2721 | 0.4978 | 0.5652 |
| <i>Spiraea alpina</i>                                | 0.5396 | 0.5926 | 0.6464 |
| <i>Spiraea mongolica</i>                             | 0.4503 | 0.4036 | 0.3879 |
| <i>Spiraea myrtilloides</i>                          | 0.1471 | 0.2722 | 0.4282 |
| <i>Spiraea rosthornii</i>                            | 0.1819 | 0.2057 | 0.2205 |
| <i>Spiranthes sinensis</i>                           | 0.2661 | 0.492  | 0.6308 |
| <i>Stachys sieboldii</i>                             | 0.2212 | 0.2875 | 0.2755 |
| <i>Stellaria alaschanica</i>                         | 0.4309 | 0.5711 | 0.6656 |
| <i>Stellaria arenarioides</i>                        | 0.5776 | 0.5776 | 0.5776 |
| <i>Stellaria decumbens</i>                           | 0.4992 | 0.5605 | 0.5991 |
| <i>Stellaria decumbens</i> var. <i>pulvinata</i>     | 0.155  | 0.2019 | 0.2221 |
| <i>Stellaria dianthifolia</i>                        | 0.5914 | 0.605  | 0.6015 |
| <i>Stellaria graminea</i>                            | 0.0962 | 0.2019 | 0.3933 |
| <i>Stellaria uda</i>                                 | 0.6076 | 0.6149 | 0.6172 |
| <i>Stellaria umbellata</i>                           | 0.4164 | 0.427  | 0.4975 |
| <i>Stellera chamaejasme</i>                          | 0.4675 | 0.4912 | 0.5207 |
| <i>Stipa aliena</i>                                  | 0.213  | 0.2283 | 0.2225 |
| <i>Stipa breviflora</i>                              | 0.1698 | 0.3794 | 0.5886 |
| <i>Stipa bungeana</i>                                | 0.373  | 0.3881 | 0.3972 |
| <i>Stipa capillacea</i>                              | 0.3088 | 0.4851 | 0.4762 |
| <i>Stipa caucasica</i> subsp. <i>glareosa</i>        | 0.4035 | 0.546  | 0.6479 |
| <i>Stipa penicillata</i>                             | 0.4395 | 0.5276 | 0.506  |
| <i>Stipa purpurea</i>                                | 0.6182 | 0.6182 | 0.6173 |
| <i>Stipa sareptana</i> var. <i>krylovii</i>          | 0.3324 | 0.4662 | 0.6109 |
| <i>Stipa subsessiliflora</i>                         | 0.4813 | 0.6077 | 0.6978 |
| <i>Stuckenia pectinata</i>                           | 0.6027 | 0.6116 | 0.6209 |

|                                                    |        |        |        |
|----------------------------------------------------|--------|--------|--------|
| <i>Suaeda corniculata</i> var. <i>olufsenii</i>    | 0.183  | 0.192  | 0.1968 |
| <i>Suaeda glauca</i>                               | 0.2267 | 0.4221 | 0.5831 |
| <i>Suaeda prostrata</i>                            | 0.3497 | 0.5232 | 0.5612 |
| <i>Swertia alba</i>                                | 0.2722 | 0.476  | 0.6427 |
| <i>Swertia bifolia</i>                             | 0.5912 | 0.6177 | 0.6367 |
| <i>Swertia dichotoma</i>                           | 0.4775 | 0.658  | 0.7866 |
| <i>Swertia diluta</i>                              | 0.151  | 0.4157 | 0.6672 |
| <i>Swertia erythrosticta</i>                       | 0.3816 | 0.5967 | 0.6421 |
| <i>Swertia franchetiana</i>                        | 0.1595 | 0.18   | 0.1818 |
| <i>Swertia mussotii</i>                            | 0.2799 | 0.5088 | 0.6424 |
| <i>Swertia przewalskii</i>                         | 0.1603 | 0.2133 | 0.2648 |
| <i>Swertia tetraptera</i>                          | 0.5466 | 0.5881 | 0.6139 |
| <i>Swertia wolfgangiana</i>                        | 0.4694 | 0.4694 | 0.4694 |
| <i>Sympegma regelii</i>                            | 0.2591 | 0.384  | 0.501  |
| <i>Syncalathium disciforme</i>                     | 0.2867 | 0.2842 | 0.2852 |
| <i>Syringa oblata</i>                              | 0.6088 | 0.6265 | 0.6427 |
| <i>Syringa pubescens</i> subsp. <i>microphylla</i> | 0.4097 | 0.517  | 0.6333 |
| <i>Tamarix austromongolica</i>                     | 0.4252 | 0.6393 | 0.7972 |
| <i>Tamarix chinensis</i>                           | 0.6252 | 0.6295 | 0.6322 |
| <i>Tamarix gracilis</i>                            | 0.2877 | 0.5317 | 0.7458 |
| <i>Tamarix laxa</i>                                | 0.3807 | 0.623  | 0.7906 |
| <i>Tamarix ramosissima</i>                         | 0.4309 | 0.6525 | 0.8012 |
| <i>Tanacetum barclayanum</i>                       | 0.2989 | 0.5109 | 0.6773 |
| <i>Tanacetum tatsienense</i>                       | 0.296  | 0.5322 | 0.6952 |
| <i>Taphrospermum fontanum</i>                      | 0.1168 | 0.132  | 0.226  |
| <i>Taraxacum albiflos</i>                          | 0.5268 | 0.5504 | 0.5828 |
| <i>Taraxacum brevirostre</i>                       | 0.2813 | 0.3697 | 0.4216 |
| <i>Taraxacum dissectum</i>                         | 0.2532 | 0.5102 | 0.7493 |
| <i>Taraxacum lugubre</i>                           | 0.3414 | 0.6319 | 0.8317 |
| <i>Taraxacum maurocarpum</i>                       | 0.1415 | 0.3505 | 0.5618 |
| <i>Taraxacum mongolicum</i>                        | 0.4771 | 0.6079 | 0.7211 |
| <i>Taraxacum platyepidum</i>                       | 0.5587 | 0.6031 | 0.6338 |
| <i>Taraxacum sikkimense</i>                        | 0.2388 | 0.251  | 0.2834 |
| <i>Tephroseris rufa</i>                            | 0.4311 | 0.5655 | 0.6571 |
| <i>Thalictrum alpinum</i>                          | 0.2531 | 0.259  | 0.2711 |
| <i>Thalictrum alpinum</i> var. <i>elatum</i>       | 0.2933 | 0.4249 | 0.5134 |
| <i>Thalictrum baicalense</i>                       | 0.2574 | 0.44   | 0.578  |
| <i>Thalictrum foetidum</i>                         | 0.1651 | 0.1739 | 0.296  |
| <i>Thalictrum leuconotum</i>                       | 0.3076 | 0.4352 | 0.5428 |
| <i>Thalictrum minus</i>                            | 0.5789 | 0.5788 | 0.5764 |
| <i>Thalictrum minus</i> var. <i>hypoleucum</i>     | 0.3944 | 0.4268 | 0.5112 |
| <i>Thalictrum petaloideum</i>                      | 0.2346 | 0.3327 | 0.3431 |
| <i>Thalictrum przewalskii</i>                      | 0.2608 | 0.4519 | 0.6019 |
| <i>Thalictrum rutifolium</i>                       | 0.1794 | 0.2117 | 0.254  |
| <i>Thalictrum uncatum</i>                          | 0.2692 | 0.4867 | 0.6617 |
| <i>Thermopsis alpina</i>                           | 0.3488 | 0.3473 | 0.3498 |
| <i>Thermopsis fabacea</i>                          | 0.3928 | 0.5436 | 0.6407 |
| <i>Thermopsis inflata</i>                          | 0.2961 | 0.3692 | 0.4204 |
| <i>Thermopsis lanceolata</i>                       | 0.2243 | 0.4413 | 0.6179 |
| <i>Thermopsis przewalskii</i>                      | 0.0667 | 0.0762 | 0.1236 |
| <i>Thlaspi arvense</i>                             | 0.4676 | 0.5456 | 0.6115 |
| <i>Thylacospermum caespitosum</i>                  | 0.4086 | 0.5711 | 0.6989 |
| <i>Tibetia himalaica</i>                           | 0.2141 | 0.4329 | 0.6119 |
| <i>Tongoloa elata</i>                              | 0.3158 | 0.509  | 0.7261 |
| <i>Trichophorum distigmaticum</i>                  | 0.3287 | 0.5384 | 0.6875 |
| <i>Triglochin maritima</i>                         | 0.4236 | 0.5452 | 0.6274 |
| <i>Triglochin palustris</i>                        | 0.3154 | 0.5095 | 0.552  |
| <i>Trigonotis peduncularis</i>                     | 0.272  | 0.398  | 0.3804 |
| <i>Trigonotis tibetica</i>                         | 0.3901 | 0.5962 | 0.7665 |
| <i>Trikeria pappiformis</i>                        | 0.3143 | 0.3492 | 0.4033 |
| <i>Triosteum pinnatifidum</i>                      | 0.2469 | 0.3204 | 0.369  |
| <i>Trisetum altaicum</i>                           | 0.5796 | 0.5818 | 0.5776 |
| <i>Trisetum spicatum</i>                           | 0.5219 | 0.551  | 0.5684 |
| <i>Triticum aestivum</i>                           | 0.1853 | 0.1989 | 0.2185 |
| <i>Trollius farreri</i>                            | 0.0238 | 0.0262 | 0.0299 |
| <i>Trollius pumilus</i>                            | 0.082  | 0.0899 | 0.0941 |

|                                                      |        |        |        |
|------------------------------------------------------|--------|--------|--------|
| <i>Trollius pumilus</i> var. <i>tanguticus</i>       | 0.4951 | 0.6205 | 0.7455 |
| <i>Trollius ranunculoides</i>                        | 0.1925 | 0.3964 | 0.6267 |
| <i>Tussilago farfara</i>                             | 0.1676 | 0.2593 | 0.341  |
| <i>Typha angustifolia</i>                            | 0.2409 | 0.2656 | 0.28   |
| <i>Urtica cannabina</i>                              | 0.4243 | 0.5068 | 0.5629 |
| <i>Urtica dioica</i>                                 | 0.1967 | 0.2212 | 0.321  |
| <i>Urtica hyperborea</i>                             | 0.1422 | 0.3449 | 0.5251 |
| <i>Urtica triangularis</i>                           | 0.2382 | 0.2661 | 0.2829 |
| <i>Urtica triangularis</i> subsp. <i>pinnatifida</i> | 0.2173 | 0.3282 | 0.4606 |
| <i>Urtica triangularis</i> subsp. <i>trichocarpa</i> | 0.0856 | 0.0925 | 0.0959 |
| <i>Vaccaria hispanica</i>                            | 0.1565 | 0.3833 | 0.6121 |
| <i>Valeriana officinalis</i>                         | 0.1621 | 0.3808 | 0.6019 |
| <i>Valeriana tangutica</i>                           | 0.2165 | 0.2214 | 0.2355 |
| <i>Veronica anagallis-aquatica</i>                   | 0.5869 | 0.5932 | 0.6032 |
| <i>Veronica biloba</i>                               | 0.315  | 0.4977 | 0.6844 |
| <i>Veronica ciliata</i>                              | 0.2482 | 0.3272 | 0.3863 |
| <i>Veronica eriogyne</i>                             | 0.5352 | 0.5262 | 0.5214 |
| <i>Veronica rockii</i>                               | 0.4056 | 0.6606 | 0.8349 |
| <i>Veronica vandelliioides</i>                       | 0.0633 | 0.0799 | 0.0925 |
| <i>Viburnum farreri</i>                              | 0.315  | 0.3423 | 0.3596 |
| <i>Viburnum mongolicum</i>                           | 0.4779 | 0.4906 | 0.4924 |
| <i>Vicatia thibetica</i>                             | 0.1484 | 0.1666 | 0.1808 |
| <i>Vicia amoena</i>                                  | 0.5346 | 0.6054 | 0.6534 |
| <i>Vicia bungei</i>                                  | 0.2377 | 0.4466 | 0.5746 |
| <i>Vicia cracca</i>                                  | 0.3743 | 0.4786 | 0.5296 |
| <i>Vicia japonica</i>                                | 0.1628 | 0.3242 | 0.5213 |
| <i>Vicia megalotropis</i>                            | 0.3308 | 0.542  | 0.728  |
| <i>Vicia multicaulis</i>                             | 0.3963 | 0.4282 | 0.4484 |
| <i>Vicia sativa</i>                                  | 0.6169 | 0.6268 | 0.6378 |
| <i>Vicia sativa</i> subsp. <i>nigra</i>              | 0.2477 | 0.4135 | 0.5723 |
| <i>Vicia unijuga</i>                                 | 0.4779 | 0.4779 | 0.4779 |
| <i>Viola biflora</i>                                 | 0.41   | 0.4341 | 0.4643 |
| <i>Viola biflora</i> var. <i>rockiana</i>            | 0.3439 | 0.5307 | 0.6689 |
| <i>Viola bulbosa</i>                                 | 0.2152 | 0.3691 | 0.3609 |
| <i>Viola kunawarensis</i>                            | 0.3426 | 0.371  | 0.4132 |
| <i>Woodsia andersonii</i>                            | 0.3535 | 0.5296 | 0.6465 |
| <i>Xanthium strumarium</i>                           | 0.598  | 0.598  | 0.5983 |
| <i>Xanthopappus subacaulis</i>                       | 0.2539 | 0.4177 | 0.4699 |
| <i>Youngia simulatrix</i>                            | 0.4381 | 0.576  | 0.6677 |
